# Supplementary material for: Rhodium-catalyzed C–H activation of 3-(indolin-1-yl)-3-oxopropanenitriles with diazo compounds and tandem cyclization leading to hydrogenated azepino[3,2,1-hi]indoles
Source: Royal Society of Chemistry journal article supplement (doi:10.1039/c6cc07758g), 2016-01-01
Supplement: c6cc07758g1.pdf [file c6cc07758g1.pdf]

## Supporting Information

# Rhodium-Catalyzed C–H Activation of 3-(Indolin-1-yl)-3-oxopropanenitriles with Diazo Compounds and Tandem Cyclization Leading to Hydrogenated Azepino[3,2,1-*hi*]indoles

Tao Zhou,<sup>†</sup> Bin Li,<sup>†</sup> and Baiquan Wang<sup>\*, †, ‡, §</sup>

<sup>†</sup>State Key Laboratory of Elemento-Organic Chemistry, College of Chemistry, and

<sup>‡</sup>Collaborative Innovation Center of Chemical Science and Engineering, Nankai University,  
Tianjin 300071, China

<sup>§</sup>State Key Laboratory of Organometallic Chemistry, Shanghai Institute of Organic Chemistry,  
Chinese Academy of Sciences, Shanghai 200032, China

bqwang@nankai.edu.cn

## Contents

|                                                                   |         |
|-------------------------------------------------------------------|---------|
| Table of Contents                                                 | S1      |
| Experimental Section: General Considerations                      | S2      |
| General Procedure for the Rh(III)-Catalyzed Cascade Synthesis (A) | S2      |
| Table S1                                                          | S3      |
| General Procedure for the Rh(III)-Catalyzed Cascade Synthesis (B) | S3      |
| Preparation and Characterization of Products <b>3–6</b>           | S4–S17  |
| X-ray crystallography                                             | S18     |
| NMR Spectra                                                       | S19–S55 |
| References                                                        | S55     |

## Experimental Section:

**General Considerations.** All reactions were carried out under argon atmosphere using standard Schlenk technique.  $^1\text{H}$  NMR (400 MHz),  $^{19}\text{F}$  (376 MHz), and  $^{13}\text{C}$  NMR (100MHz) were recorded on Bruker AV400 NMR spectrometer with  $\text{CDCl}_3$  as solvent. Chemical shifts of  $^1\text{H}$ ,  $^{19}\text{F}$ , and  $^{13}\text{C}$  NMR spectra are reported in parts per million (ppm). The residual solvent signals were used as references and the chemical shifts converted to the TMS scale ( $\text{CDCl}_3$ :  $\delta_{\text{H}} = 7.26$  ppm,  $\delta_{\text{C}} = 77.00$  ppm). All coupling constants ( $J$  values) were reported in Hertz (Hz). Multiplicities are reported as follows: singlet (s), doublet (d), doublet of doublets (dd), triplet (t), quartet (q), and multiplet (m). Column chromatography was performed on silica gel 200–300 mesh. Analytical thin-layer chromatography (TLC) was performed on pre-coated, glass-backed silica gel plates. Visualization of the developed chromatogram was performed by UV absorbance (254 nm). IR spectra were recorded as KBr disks on a Nicolet 380 FT-IR spectrometer. High-resolution mass spectrometry (HRMS) were done on Varian 7.0 T FTICR-mass spectrometer.  $[\text{Cp}^*\text{RhCl}_2]_2$  was prepared from  $\text{RhCl}_3 \cdot x\text{H}_2\text{O}$  following a literature procedure.<sup>[1]</sup> The substrates **1a-1l** was prepared according to the literature we reported before.<sup>[2]</sup> Unless otherwise noted below, all other compounds have been reported in the literature or are commercially available from Alfa Aesar China (Tianjin) Chemical Co., Ltd. without any further purification.

### General Procedure for the Rh(III)-Catalyzed Cascade Synthesis (A)

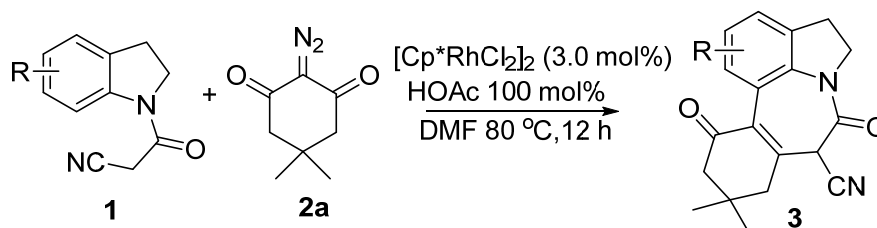

A mixture of substituted 3-(indolin-1-yl)-3-oxopropanenitrile (**1**) (0.2 mmol, 1.0 equiv), 2-diazo-5,5-dimethylcyclohexane-1,3-dione (**2**) (0.3 mmol, 1.5 equiv),  $[\text{Cp}^*\text{RhCl}_2]_2$  (6.2 mg, 0.01 mmol, 5.0 mol %), and HOAc (12 mg, 0.2 mmol, 1.0 equiv) were weighted in a Schlenk tube equipped with a stir bar. Dry dioxane (1.0 mL) was added and the mixture was stirred at  $80\text{ }^\circ\text{C}$  for 12 h under Ar atmosphere. Afterwards, it was diluted with  $\text{CH}_2\text{Cl}_2$  and transferred to a round bottom flask. Silica was added to the flask and volatiles were evaporated under reduced pressure. The purification was performed by flash column chromatography on silica gel with EtOAc/petroleum ether.

**Table 1 S1** Optimization studies<sup>a</sup>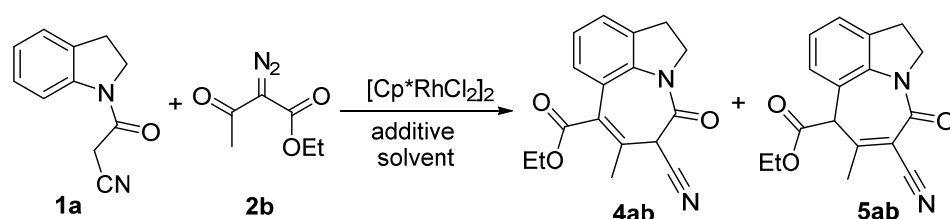

| Entry    | Temp (°C) | Solvent                            | Additive     | Yield <b>4ab</b> (%) <sup>b</sup> | Yield <b>5ab</b> (%) <sup>b</sup> |
|----------|-----------|------------------------------------|--------------|-----------------------------------|-----------------------------------|
| 1        | 80        | dioxane                            | HOAc         | 25                                | 45                                |
| 2        | 80        | dioxane                            | none         | 12                                | 21                                |
| 3        | 80        | THF                                | HOAc         | 19                                | 62                                |
| 4        | 80        | MeOH                               | HOAc         | 15                                | 58                                |
| 5        | 80        | CH <sub>3</sub> CN                 | HOAc         | 16                                | 75                                |
| 6        | 80        | DMF                                | HOAc         | 21                                | 63                                |
| 7        | 80        | DCE                                | HOAc         | 22                                | 71                                |
| 8        | 80        | CF <sub>3</sub> CH <sub>2</sub> OH | HOAc         | trace                             | 44                                |
| <b>9</b> | <b>80</b> | <b>CH<sub>3</sub>CN</b>            | <b>PivOH</b> | <b>19</b>                         | <b>80</b>                         |
| 10       | 80        | CH <sub>3</sub> CN                 | AgOAc        | trace                             | 33                                |
| 11       | 60        | CH <sub>3</sub> CN                 | PivOH        | 14                                | 68                                |
| 12       | 100       | CH <sub>3</sub> CN                 | PivOH        | 32                                | 56                                |

**General Procedure for the Rh(III)-Catalyzed Cascade Synthesis (B)**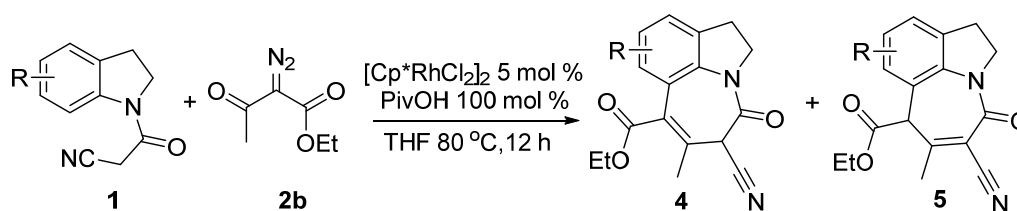

A mixture of substituted 3-(indolin-1-yl)-3-oxopropanenitrile (**1**) (0.2 mmol, 1.0 equiv), ethyl 2-diazo-3-oxobutanoate (**2**) (0.4 mmol, 1.0 equiv), [Cp\*RhCl<sub>2</sub>]<sub>2</sub> (6.2 mg, 0.01 mmol, 5.0 mol %), and PivOH (20.4 mg, 0.2 mmol, 1.0 equiv) were weighed in a Schlenk tube equipped with a stir bar. Dry DMF (0.5 mL) was added and the mixture was stirred at 100 °C for 12 h under Ar atmosphere. Afterwards, it was diluted with CH<sub>2</sub>Cl<sub>2</sub> and transferred to a round bottom flask. Silica was added to the flask and volatiles were evaporated under reduced pressure. The purification was performed by flash column chromatography on silica gel with EtOAc/petroleum ether.

### Characterization of Products 3, 4, 5, and 6

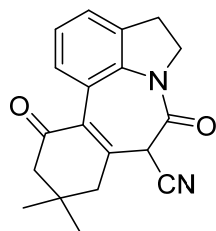

#### 7,7-Dimethyl-4,9-dioxo-1,2,4,5,6,7,8,9-octahydrobenzo[4,5]azepino[3,2,1-hi]indole-5-carbonitrile (3aa)

The title compound was isolated by column chromatography (eluent: EtOAc/petroleum ether = 1/5 to 1/2) as a yellow solid in 84% yield (51.5 mg, 0.168 mmol) following the general procedure A. Mp: 185–187 °C. **<sup>1</sup>H NMR (CDCl<sub>3</sub>, 400 MHz):** δ 7.57 (d, *J* = 8.0 Hz, 1H), 7.33 (d, *J* = 7.3 Hz, 1H), 7.19 (t, *J* = 7.7 Hz, 1H), 4.82 – 4.55 (m, 1H), 4.02 (s, 1H), 3.96 – 3.77 (m, 1H), 3.43 – 3.23 (m, 1H), 3.14 – 2.90 (m, 2H), 2.73 – 2.52 (m, 2H), 2.39 (d, *J* = 15.1 Hz, 1H), 1.22 (s, 3H), 0.96 (s, 3H). **<sup>13</sup>C NMR (CDCl<sub>3</sub>, 100 MHz):** δ 195.93, 161.18, 142.24, 140.05, 133.71, 131.54, 129.35, 125.56, 124.13, 120.12, 113.67, 51.65, 49.57, 45.10, 43.37, 33.09, 29.90, 28.39, 25.95. **HRMS (ESI):** Calcd for C<sub>19</sub>H<sub>19</sub>N<sub>2</sub>O<sub>2</sub> [M+H]<sup>+</sup> 307.1441, found: 307.1440.

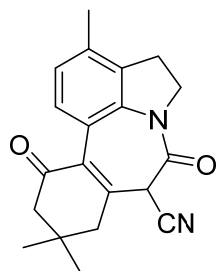

#### 7,7,12-Trimethyl-4,9-dioxo-1,2,4,5,6,7,8,9-octahydrobenzo[4,5]azepino[3,2,1-hi]indole-5-carbonitrile (3ba)

The title compound was isolated by column chromatography (eluent: EtOAc/petroleum ether = 1/5 to 1/2) as a yellow solid in 76% yield (48.7 mg, 0.152 mmol) following the general procedure A. Mp: 158–160 °C. **<sup>1</sup>H NMR (CDCl<sub>3</sub>, 400 MHz):** δ 7.46 (d, *J* = 8.1 Hz, 1H), 7.00 (d, *J* = 8.1 Hz, 1H), 4.67 (t, *J* = 10.3 Hz, 1H), 4.01 (s, 1H), 3.84 (d, *J* = 10.5 Hz, 1H), 3.24 – 3.12 (m, 1H), 3.04 – 2.88 (m, 2H), 2.66 – 2.52 (m, 2H), 2.37 (s, 1H), 2.30 (s, 3H), 1.20 (s, 3H), 0.93 (s, 3H). **<sup>13</sup>C NMR (CDCl<sub>3</sub>, 100 MHz):** δ 196.08, 161.10, 141.28, 139.73, 135.57, 131.98, 131.48, 129.18, 125.42, 117.44, 113.74, 51.55, 49.28, 44.99, 43.16, 33.03, 29.88, 27.12, 25.80, 18.55. **HRMS (ESI):** Calcd for C<sub>20</sub>H<sub>21</sub>N<sub>2</sub>O<sub>2</sub> [M+H]<sup>+</sup> 321.1598, found: 321.1602.

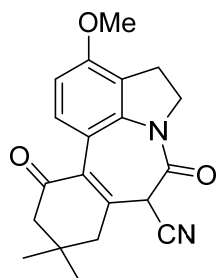

#### 12-Methoxy-7,7-dimethyl-4,9-dioxo-1,2,4,5,6,7,8,9-octahydrobenzo[4,5]azepino[3,2,1-hi]indole-5-carbonitrile (3ca)

The title compound was isolated by column chromatography (eluent: EtOAc/petroleum ether = 1/5 to 1/1) as a yellow solid in 68% yield (45.4 mg, 0.136 mmol) following the general procedure A. Mp: 168–169 °C. **<sup>1</sup>H NMR (CDCl<sub>3</sub>, 400 MHz):** δ 7.57 (d, *J* = 8.9 Hz, 1H), 6.79 (d, *J* = 8.9 Hz, 1H), 4.64 (t, *J* =

10.0 Hz, 1H), 4.07 (s, 1H), 3.89 (s, 3H), 3.87 – 3.75 (m, 1H), 3.18 – 3.07 (m, 1H), 3.06 – 2.87 (m, 2H), 2.70 – 2.49 (m, 2H), 2.35 (d,  $J = 15.1$  Hz, 1H), 1.19 (s, 3H), 0.94 (s, 3H).  **$^{13}\text{C}$  NMR (CDCl<sub>3</sub>, 100 MHz):**  $\delta$  196.32, 161.11, 156.20, 141.49, 140.35, 131.38, 131.15, 119.67, 113.76, 112.86, 107.43, 55.63, 51.60, 49.88, 45.07, 43.14, 33.03, 29.89, 25.83, 25.30. **HRMS (ESI):** Calcd for C<sub>20</sub>H<sub>21</sub>N<sub>2</sub>O<sub>3</sub> [M+H]<sup>+</sup> 337.1547, found: 337.1546.

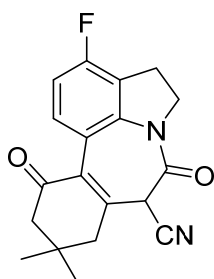

**12-Fluoro-7,7-dimethyl-4,9-dioxo-1,2,4,5,6,7,8,9-octahydrobenzo[4,5]azepino[3,2,1-hi]indole-5-carbonitrile (3da)**

The title compound was isolated by column chromatography (eluent: EtOAc/petroleum ether = 1/5 to 1/2) as a yellow solid in 91% yield (58.9 mg, 0.182mmol) following the general procedure A. Mp: 74–76 °C.  **$^1\text{H}$  NMR (CDCl<sub>3</sub>, 400 MHz):**  $\delta$  7.59 (dd,  $J = 8.9, 5.4$  Hz, 1H), 6.93 (t,  $J = 8.5$  Hz, 1H), 4.70 (d,  $J = 10.1$  Hz, 1H), 4.06 (s, 1H), 3.93 (d,  $J = 10.6$  Hz, 1H), 3.26 (s, 1H), 3.17 (d,  $J = 9.2$  Hz, 1H), 2.97 (d,  $J = 19.4$  Hz, 1H), 2.69 – 2.55 (m, 2H), 2.38 (d,  $J = 15.3$  Hz, 1H), 1.22 (s, 3H), 0.97 (s, 3H).  **$^{13}\text{C}$  NMR (CDCl<sub>3</sub>, 100 MHz):**  $\delta$  195.89, 161.03, 160.05, 157.56, 142.38, 141.67, 131.72, 131.64, 130.98, 119.22, 119.00, 116.16, 113.45, 112.05, 111.84, 51.43, 49.98, 45.07, 43.19, 33.00, 29.76, 25.83, 24.68.  **$^{19}\text{F}$  NMR (CDCl<sub>3</sub>, 376 MHz):**  $\delta$  -115.61. **HRMS (ESI):** Calcd for C<sub>19</sub>H<sub>18</sub>FN<sub>2</sub>O<sub>2</sub> [M+H]<sup>+</sup> 325.1347, found: 325.1348.

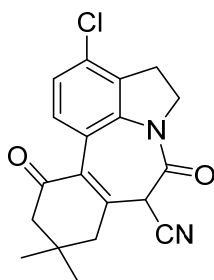

**12-Chloro-7,7-dimethyl-4,9-dioxo-1,2,4,5,6,7,8,9-octahydrobenzo[4,5]azepino[3,2,1-hi]indole-5-carbonitrile (3ea)**

The title compound was isolated by column chromatography (eluent: EtOAc/petroleum ether = 1/5 to 1/2) as a yellow solid in 84% yield (57.1 mg, 0.168 mmol) following the general procedure A. Mp: 100–102 °C.  **$^1\text{H}$  NMR (CDCl<sub>3</sub>, 400 MHz):**  $\delta$  7.52 (d,  $J = 8.6$  Hz, 1H), 7.15 (d,  $J = 8.6$  Hz, 1H), 4.68 (t,  $J = 10.2$  Hz, 1H), 4.01 (s, 1H), 3.96 – 3.84 (m, 1H), 3.34 – 3.22 (m, 1H), 3.16 – 3.07 (m, 1H), 2.95 (d,  $J = 19.5$  Hz, 1H), 2.67 – 2.53 (m, 2H), 2.41 (d,  $J = 16.4$  Hz, 1H), 1.20 (s, 3H), 0.94 (s, 3H).  **$^{13}\text{C}$  NMR (CDCl<sub>3</sub>, 100 MHz):**  $\delta$  195.75, 161.06, 142.32, 141.01, 132.01, 131.53, 131.00, 130.80, 124.28, 118.30, 113.38, 51.45, 49.26, 45.09, 43.30, 33.06, 29.82, 27.81, 25.88. **HRMS (ESI):** Calcd for C<sub>19</sub>H<sub>18</sub>ClN<sub>2</sub>O<sub>2</sub> [M+H]<sup>+</sup> 341.1051, found: 341.1053.

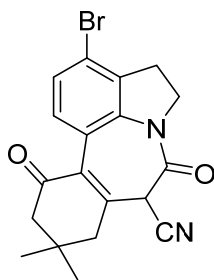

**12-Bromo-7,7-dimethyl-4,9-dioxo-1,2,4,5,6,7,8,9-octahydrobenzo[4,5]azepino[3,2,1-hi]indole-5-carbonitrile (3fa)**

The title compound was isolated by column chromatography (eluent: EtOAc/petroleum ether = 1/5 to 1/2) as a yellow solid in 74% yield (56.8 mg 0.148 mmol) following the general procedure C. Mp: 108–110 °C. **<sup>1</sup>H**

**NMR (CDCl<sub>3</sub>, 400 MHz):** δ 7.44 (d, *J* = 8.6 Hz, 1H), 7.29 (d, *J* = 8.6 Hz, 1H), 4.66 (t, *J* = 10.2 Hz, 1H), 4.00 (s, 1H), 3.94 – 3.82 (m, 1H), 3.33 – 3.18 (m, 1H), 3.12 – 3.02 (m, 1H), 2.94 (d, *J* = 19.5 Hz, 1H), 2.68 – 2.49 (m, 2H), 2.36 (d, *J* = 15.3 Hz, 1H), 1.20 (s, 3H), 0.94 (s, 3H). **<sup>13</sup>C NMR (CDCl<sub>3</sub>, 100 MHz):** δ 195.64, 161.13, 142.39, 140.70, 134.34, 131.03, 130.82, 127.03, 120.36, 118.79, 113.35, 51.42, 48.88, 45.07, 43.29, 33.03, 29.80, 25.88. **HRMS (ESI):** Calcd for C<sub>19</sub>H<sub>18</sub>BrN<sub>2</sub>O<sub>2</sub> [M+H]<sup>+</sup> 385.0546, found: 385.0542.

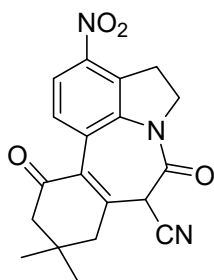

**7,7-Dimethyl-12-nitro-4,9-dioxo-1,2,4,5,6,7,8,9-octahydrobenzo[4,5]azepino[3,2,1-hi]indole-5-carbonitrile (3ga)**

The title compound was isolated by column chromatography (eluent: EtOAc/petroleum ether = 1/5 to 1/2) as a yellow solid in 78% yield (54.5 mg, 0.156 mmol) following the general procedure B. Mp: 215–217 °C. **<sup>1</sup>H**

**NMR (CDCl<sub>3</sub>, 400 MHz):** δ 7.97 (d, *J* = 8.8 Hz, 1H), 7.74 (d, *J* = 8.8 Hz, 1H), 4.76 (s, 1H), 4.10 – 3.87 (m, 2H), 3.68 (d, *J* = 8.4 Hz, 2H), 3.00 (d, *J* = 19.7 Hz, 1H), 2.73 – 2.53 (m, 2H), 2.41 (d, *J* = 15.4 Hz, 1H), 1.23 (s, 3H), 0.97 (s, 3H). **<sup>13</sup>C NMR (CDCl<sub>3</sub>, 100 MHz):** δ 195.11, 160.92, 145.27, 144.62, 141.99, 131.59, 131.10, 130.62, 124.84, 118.60, 112.92, 51.30, 49.63, 45.14, 43.52, 33.09, 29.69, 26.01. **HRMS (ESI):** Calcd for C<sub>19</sub>H<sub>18</sub>N<sub>3</sub>O<sub>4</sub> [M+H]<sup>+</sup> 352.1292, found: 352.1292.

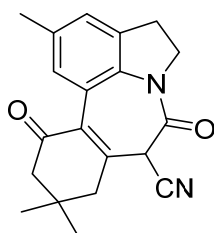

**7,7,11-Trimethyl-4,9-dioxo-1,2,4,5,6,7,8,9-octahydrobenzo[4,5]azepino[3,2,1-hi]indole-5-carbonitrile (3ha)**

The title compound was isolated by column chromatography (eluent: EtOAc/petroleum ether = 1/5 to 1/2) as a yellow solid in 83% yield (52.9

mg, 0.186 mmol) following the general procedure A. Mp: 88–90 °C. **<sup>1</sup>H NMR (CDCl<sub>3</sub>, 400 MHz):** δ 7.37 (s, 1H), 7.16 (s, 1H), 4.76 – 4.59 (m, 1H), 4.03 (s, 1H), 3.85 (d, *J* = 9.7 Hz, 1H),

3.29 (d,  $J = 9.0$  Hz, 1H), 3.08 – 2.92 (m, 2H), 2.70 – 2.54 (m, 2H), 2.40 (s, 4H), 1.22 (s, 3H), 0.97 (s, 3H).  **$^{13}\text{C}$  NMR (CDCl<sub>3</sub>, 100 MHz):**  $\delta$  195.97, 160.98, 141.95, 137.95, 133.88, 133.66, 131.35, 129.12, 126.61, 119.71, 113.77, 51.61, 49.56, 45.04, 43.28, 32.97, 29.79, 28.26, 25.82, 21.17. **HRMS (ESI):** Calcd for C<sub>20</sub>H<sub>21</sub>N<sub>2</sub>O<sub>2</sub> [M+H]<sup>+</sup> 321.1598, found: 321.1599.

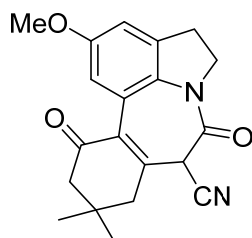

**11-Methoxy-7,7-dimethyl-4,9-dioxo-1,2,4,5,6,7,8,9-octahydrobenzo[4,5]azepino[3,2,1-hi]indole-5-carbonitrile (3ia)**

The title compound was isolated by column chromatography (eluent: EtOAc/petroleum ether = 1/5 to 1/2) as a yellow solid in 86% yield (57.7 mg, 0.172 mmol) following the general procedure A. Mp: 83–84 °C.  **$^1\text{H}$  NMR (CDCl<sub>3</sub>, 400 MHz):**  $\delta$  7.07 (d,  $J = 1.6$  Hz, 1H), 6.92 (s, 1H), 4.64 (t,  $J = 10.2$  Hz, 1H), 4.00 (s, 1H), 3.80 (s, 4H), 3.33 – 3.21 (m, 1H), 3.05 – 2.90 (m, 2H), 2.68 – 2.52 (m, 2H), 2.36 (d,  $J = 15.2$  Hz, 1H), 1.19 (s, 3H), 0.94 (s, 3H).  **$^{13}\text{C}$  NMR (CDCl<sub>3</sub>, 100 MHz):**  $\delta$  196.00, 160.69, 156.21, 142.33, 135.21, 134.08, 131.04, 120.58, 113.99, 113.77, 111.97, 55.73, 51.65, 49.69, 45.09, 43.32, 32.91, 29.73, 28.56, 25.90. **HRMS (ESI):** Calcd for C<sub>20</sub>H<sub>21</sub>N<sub>2</sub>O<sub>3</sub> [M+H]<sup>+</sup> 337.1547, found: 337.1547.

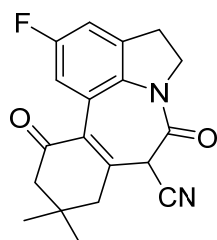

**11-Fluoro-7,7-dimethyl-4,9-dioxo-1,2,4,5,6,7,8,9-octahydrobenzo[4,5]azepino[3,2,1-hi]indole-5-carbonitrile (3ja)**

The title compound was isolated by column chromatography (eluent: EtOAc/petroleum ether = 1/5 to 1/2) as a yellow solid in 75% yield (48.9 mg, 0.150 mmol) following the general procedure A. Mp: 188–190 °C.  **$^1\text{H}$  NMR (CDCl<sub>3</sub>, 400 MHz):**  $\delta$  7.30 (dd,  $J = 10.4, 1.7$  Hz, 1H), 7.07 (d,  $J = 6.7$  Hz, 1H), 4.69 (t,  $J = 10.3$  Hz, 1H), 4.00 (s, 1H), 3.94 – 3.81 (m, 1H), 3.40 – 3.24 (m, 1H), 3.10 – 2.90 (m, 2H), 2.69 – 2.51 (m, 2H), 2.38 (d,  $J = 15.4$  Hz, 1H), 1.20 (s, 3H), 0.95 (s, 3H).  **$^{13}\text{C}$  NMR (CDCl<sub>3</sub>, 100 MHz):**  $\delta$  195.51, 160.88, 160.14, 157.72, 143.15, 136.39, 135.95, 135.86, 130.65, 121.00, 120.90, 115.34, 115.09, 113.97, 113.72, 113.47, 51.45, 49.92, 45.09, 43.38, 32.95, 29.73, 28.51, 25.93.  **$^{19}\text{F}$  NMR (CDCl<sub>3</sub>, 376 MHz):**  $\delta$  -116.95 (t,  $J = 9.2$  Hz). **HRMS (ESI):** Calcd for C<sub>19</sub>H<sub>18</sub>FN<sub>2</sub>O<sub>2</sub> [M+H]<sup>+</sup> 325.1347, found: 325.1351.

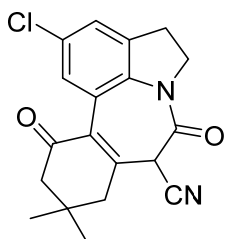

**11-Chloro-7,7-dimethyl-4,9-dioxo-1,2,4,5,6,7,8,9-octahydrobenzo[4,5]azepino[3,2,1-hi]indole-5-carbonitrile (3ka)**

The title compound was isolated by column chromatography (eluent: EtOAc/petroleum ether = 1/5 to 1/2) as a yellow solid in 80% yield (54.2 mg, 0.160 mmol) following the general procedure A. Mp: 199–200 °C. **<sup>1</sup>H NMR (CDCl<sub>3</sub>, 400 MHz):** δ 7.56 (s, 1H), 7.28 (s, 1H), 4.67 (s, 1H), 3.99 (s, 1H), 3.87 (d, *J* = 10.2 Hz, 1H), 3.39 – 3.24 (m, 1H), 3.10 – 2.90 (m, 2H), 2.68 – 2.51 (m, 2H), 2.37 (d, *J* = 15.2 Hz, 1H), 1.20 (s, 3H), 0.95 (s, 3H). **<sup>13</sup>C NMR (CDCl<sub>3</sub>, 100 MHz):** δ 195.45, 160.85, 143.12, 138.70, 135.59, 130.58, 129.61, 128.84, 125.85, 120.86, 113.38, 51.43, 49.79, 45.10, 43.39, 33.00, 29.72, 28.23, 25.95. **HRMS (ESI):** Calcd for C<sub>19</sub>H<sub>18</sub>ClN<sub>2</sub>O<sub>2</sub> [M+H]<sup>+</sup> 341.1051, found: 341.1052.

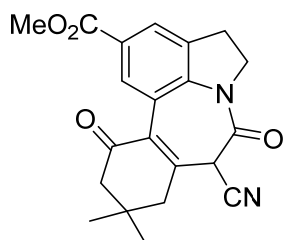

**Methyl 5-cyano-7,7-dimethyl-4,9-dioxo-1,2,4,5,6,7,8,9-octahydrobenzo[4,5]azepino[3,2,1-hi]indole-11-carboxylate (3la)**

The title compound was isolated by column chromatography (eluent: EtOAc/petroleum ether = 1/5 to 1/2) as a yellow solid in 93% yield (67.7 mg, 0.186 mmol) following the general procedure A. Mp: 132–133 °C. **<sup>1</sup>H NMR (CDCl<sub>3</sub>, 400 MHz):** δ 8.26 (s, 1H), 7.97 (s, 1H), 4.69 (t, *J* = 9.9 Hz, 1H), 4.02–3.91 (m, 5H), 3.41 – 3.27 (m, 1H), 3.16 – 3.04 (m, 1H), 2.98 (d, *J* = 19.4 Hz, 1H), 2.72 – 2.54 (m, 2H), 2.40 (d, *J* = 15.1 Hz, 1H), 2.16 (s, 1H), 1.22 (s, 3H), 0.97 (s, 3H). **<sup>13</sup>C NMR (CDCl<sub>3</sub>, 100 MHz):** δ 195.55, 166.22, 160.94, 143.28, 142.80, 134.19, 131.88, 126.21, 126.12, 119.45, 113.29, 52.35, 51.44, 49.93, 45.20, 43.38, 33.14, 30.90, 29.78, 27.92, 26.04. **HRMS (ESI):** Calcd for C<sub>21</sub>H<sub>21</sub>N<sub>2</sub>O<sub>4</sub> [M+H]<sup>+</sup> 365.1496, found: 365.1501.

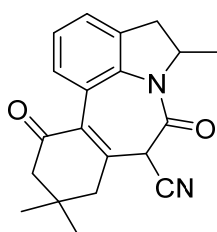

**2,7,7-Trimethyl-4,9-dioxo-1,2,4,5,6,7,8,9-octahydrobenzo[4,5]azepino[3,2,1-hi]indole-5-carbonitrile (3ma)**

The title compound was isolated by column chromatography (eluent: EtOAc/petroleum ether = 1/5 to 1/2) as a yellow solid in 74% yield (47.2 mg, 0.148 mmol) following the general procedure A. Mp: 145–147 °C. **<sup>1</sup>H NMR (CDCl<sub>3</sub>, 400 MHz):** δ 7.61 (d, *J* = 8.0 Hz, 1H), 7.31 (d, *J* = 7.2 Hz, 1H), 7.22 – 7.14 (m, 1H), 5.03 – 4.93 (m, 1H), 3.96 (s, 1H), 3.49 (dd, *J* = 16.0, 8.6 Hz, 1H), 2.97 (d, *J* = 19.4 Hz, 1H), 2.67 (s, 1H), 2.63 (s, 1H), 2.57 (d, *J* = 15.4 Hz, 1H), 2.38 (dd, *J* = 15.4, 1.5 Hz, 1H), 1.21



(s, 6H), 0.92 (s, 3H). **<sup>13</sup>C NMR (CDCl<sub>3</sub>, 100 MHz):** δ 195.91, 160.56, 142.18, 138.51, 132.53, 131.41, 129.40, 125.92, 124.07, 120.29, 113.68, 57.66, 51.62, 45.16, 43.32, 35.88, 33.01, 29.86, 25.50, 20.71. **HRMS (ESI):** Calcd for C<sub>20</sub>H<sub>21</sub>N<sub>2</sub>O<sub>2</sub> [M+H]<sup>+</sup> 321.1598, found: 321.1600.

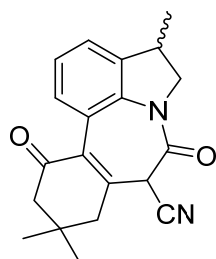

**1,7,7-Trimethyl-4,9-dioxo-1,2,4,5,6,7,8,9-octahydrobenzo[4,5]azepino[3,2,1-hi]indole-5-carbonitrile (3na)**

The title compounds were isolated by column chromatography (eluent: EtOAc/petroleum ether = 1/5 to 1/2) as a yellow solid in 84% yield (54.1 mg, 0.168 mmol) following the general procedure A. Mp: 145–147 °C. **<sup>1</sup>H**

**NMR (CDCl<sub>3</sub>, 400 MHz):** δ 7.56 (d, *J* = 7.9 Hz, 1H), 7.29 (d, *J* = 7.6 Hz, 1H), 7.23 – 7.16 (m, 1H), 4.79–4.74 (m, 0.63H), 4.25–4.23 (m, 0.37H), 4.11 – 3.90 (m, 1.26H), 3.70 – 3.53 (m, 0.74H), 3.45 – 3.28 (m, 1H), 2.96 (d, *J* = 19.4 Hz, 1H), 2.69 – 2.52 (m, 2H), 2.43 – 2.33 (m, 1H), 1.38 (d, *J* = 6.6 Hz, 2H), 1.30 (d, *J* = 6.7 Hz, 1H), 1.20 (s, 3H), 0.95 (s, 3H). **<sup>13</sup>C NMR (CDCl<sub>3</sub>, 100 MHz):** δ 195.98, 160.75, 142.28, 142.14, 139.86, 138.64, 131.41, 129.41, 129.21, 124.81, 124.15, 123.99, 119.92, 119.87, 113.68, 57.25, 56.57, 51.54, 50.38, 44.97, 44.88, 43.30, 35.35, 35.17, 33.00, 29.84, 28.24, 25.84, 21.24, 17.09. **HRMS (ESI):** Calcd for C<sub>20</sub>H<sub>21</sub>N<sub>2</sub>O<sub>2</sub>Na [M+Na]<sup>+</sup> 343.1417, found: 343.1420.

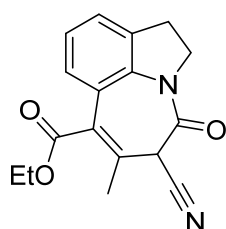

**Ethyl 3-cyano-2-methyl-4-oxo-3,4,6,7-tetrahydroazepino[3,2,1-hi]indole-1-carboxylate (4ab)**

The title compound was isolated by column chromatography (eluent: EtOAc/petroleum ether = 1/5 to 1/2) as a yellow solid in 19% yield (11.2 mg, 0.038 mmol) following the general procedure B. Mp: 159–161 °C. **<sup>1</sup>H NMR (CDCl<sub>3</sub>, 400 MHz):** δ 7.31 (d, *J* = 7.1 Hz, 1H), 7.21 (d, *J* = 7.9 Hz, 1H), 7.15 – 7.10 (m, 1H), 4.58 – 4.50 (m, 1H), 4.32 (q, *J* = 7.1 Hz, 2H), 4.05 – 3.97 (m, 1H), 3.89 (s, 1H), 3.34 – 3.22 (m, 1H), 3.16 – 3.07 (m, 1H), 2.30 (s, 3H), 1.33 (t, *J* = 7.1 Hz, 3H). **<sup>13</sup>C NMR (CDCl<sub>3</sub>, 100 MHz):** δ 167.21, 160.59, 139.39, 134.36, 131.03, 129.06, 126.57, 125.49, 124.50, 121.81, 113.90, 61.81, 49.59, 44.54, 28.27, 20.23, 14.11. **HRMS (ESI):** Calcd for C<sub>17</sub>H<sub>17</sub>N<sub>2</sub>O<sub>3</sub> [M+H]<sup>+</sup> 297.1234, found: 297.1234.

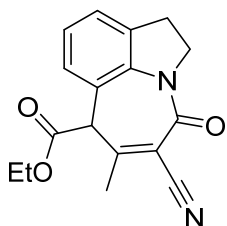

**Ethyl 3-cyano-2-methyl-4-oxo-1,4,6,7-tetrahydroazepino[3,2,1-hi]indole-1-carboxylate (5ab)**

The title compound was isolated by column chromatography (eluent: EtOAc/petroleum ether = 1/5 to 1/2) as a yellow solid in 80% yield (47.2 mg, 0.160 mmol) following the general procedure B. Mp: 155–156 °C. **<sup>1</sup>H NMR (CDCl<sub>3</sub>, 400 MHz):** δ 7.27 – 7.23 (m, 1H), 7.10 (t, *J* = 7.5 Hz, 1H), 6.98 (d, *J* = 7.6 Hz, 1H), 4.68 (ddd, *J* = 12.0, 9.8, 2.1 Hz, 1H), 4.28 (s, 1H), 4.13 – 4.06 (m, 2H), 3.91 (dd, *J* = 11.9, 10.1 Hz, 1H), 3.28 – 3.20 (m, 1H), 3.07 – 2.98 (m, 1H), 2.54 (s, 3H), 1.18 (t, *J* = 7.1 Hz, 3H). **<sup>13</sup>C NMR (CDCl<sub>3</sub>, 100 MHz):** δ 167.35, 160.08, 159.08, 139.01, 133.94, 127.73, 125.67, 125.51, 120.78, 115.52, 111.70, 62.44, 55.25, 49.10, 27.36, 27.13, 13.86. **HRMS (ESI):** Calcd for C<sub>17</sub>H<sub>17</sub>N<sub>2</sub>O<sub>3</sub> [M+H]<sup>+</sup> 297.1234, found: 297.1238.

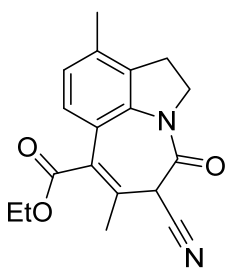

**Ethyl 3-cyano-2,8-dimethyl-4-oxo-3,4,6,7-tetrahydroazepino[3,2,1-hi]indole-1-carboxylate (4bb)**

The title compound was isolated by column chromatography (eluent: EtOAc/petroleum ether = 1/5 to 1/2) as a yellow solid in 24% yield (14.8mg, 0.048 mmol) following the general procedure B. Mp: 122–124 °C. **<sup>1</sup>H NMR (CDCl<sub>3</sub>, 400 MHz):** δ 7.12 (d, *J* = 8.1 Hz, 1H), 6.96 (d, *J* = 8.2 Hz, 1H), 4.59 – 4.51 (m, 1H), 4.32 (q, *J* = 7.1 Hz, 2H), 4.05 – 3.96 (m, 1H), 3.88 (s, 1H), 3.20 – 3.11 (m, 1H), 3.07 – 2.99 (m, 1H), 2.31 (s, 3H), 2.28 (s, 3H), 1.32 (t, *J* = 7.1 Hz, 3H). **<sup>13</sup>C NMR (CDCl<sub>3</sub>, 100 MHz):** δ 167.33, 160.60, 139.10, 135.58, 132.58, 131.03, 128.12, 126.60, 125.93, 119.36, 114.00, 61.74, 49.36, 44.54, 27.10, 20.11, 18.63, 14.12. **HRMS (ESI):** Calcd for C<sub>18</sub>H<sub>19</sub>N<sub>2</sub>O<sub>3</sub> [M+H]<sup>+</sup> 311.1390, found: 311.1397.

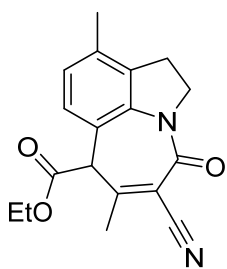

**Ethyl 3-cyano-2,8-dimethyl-4-oxo-1,4,6,7-tetrahydroazepino[3,2,1-hi]indole-1-carboxylate (5bb)**

The title compound was isolated by column chromatography (eluent: EtOAc/petroleum ether = 1/5 to 1/2) as a yellow solid in 76% yield (47.1 mg, 0.152 mmol) following the general procedure B. Mp: 120–122 °C. **<sup>1</sup>H NMR (CDCl<sub>3</sub>, 400 MHz):** δ 6.93 (d, *J* = 7.8 Hz, 1H), 6.89 (d, *J* = 7.8 Hz, 1H), 4.72–4.66 (m,

1H), 4.24 (s, 1H), 4.13–4.07 (m, 2H), 3.96–3.89 (m, 9.9 Hz, 1H), 3.15–3.06 (m, 1H), 2.99–2.92 (m, 1H), 2.53 (s, 3H), 2.26 (s, 3H), 1.18 (t,  $J = 7.1$  Hz, 3H).  **$^{13}\text{C}$  NMR (CDCl<sub>3</sub>, 100 MHz):**  $\delta$  167.58, 160.21, 159.13, 138.61, 135.50, 132.53, 127.70, 126.50, 118.07, 115.59, 111.58, 62.39, 55.05, 48.89, 27.09, 26.26, 18.37, 13.87. **HRMS (ESI):** Calcd for C<sub>18</sub>H<sub>19</sub>N<sub>2</sub>O<sub>3</sub> [M+H]<sup>+</sup> 311.1390, found: 311.1394.

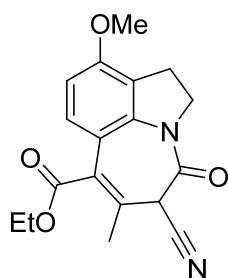

**Ethyl 3-cyano-8-methoxy-2-methyl-4-oxo-3,4,6,7-tetrahydroazepino [3,2,1-hi]indole-1-carboxylate (4cb)**

The title compound was isolated by column chromatography (eluent: EtOAc/petroleum ether = 1/5 to 1/2) as a yellow solid in 20% yield (13.2 mg, 0.04 mmol) following the general procedure B. Mp: 117–118 °C.  **$^1\text{H}$  NMR (CDCl<sub>3</sub>, 400 MHz):**  $\delta$  7.20 (d,  $J = 8.8$  Hz, 1H), 6.73 (d,  $J = 8.8$  Hz, 1H), 4.56 – 4.48 (m, 1H), 4.32 (q,  $J = 7.1$  Hz, 2H), 4.01 (d,  $J = 10.5$  Hz, 1H), 3.93 (s, 1H), 3.89 (s, 3H), 3.16 – 3.04 (m, 2H), 2.26 (s, 3H), 1.35 – 1.30 (m, 3H).  **$^{13}\text{C}$  NMR (CDCl<sub>3</sub>, 100 MHz):**  $\delta$  167.49, 160.63, 156.21, 140.85, 130.83, 128.51, 126.92, 120.26, 114.99, 114.02, 107.85, 61.71, 55.66, 49.95, 44.57, 25.25, 20.05, 14.13. **HRMS (ESI):** Calcd for C<sub>18</sub>H<sub>19</sub>N<sub>2</sub>O<sub>4</sub> [M+H]<sup>+</sup> 327.1339, found: 327.1347.

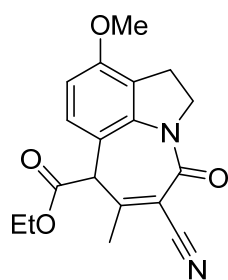

**Ethyl 3-cyano-8-methoxy-2-methyl-4-oxo-1,4,6,7-tetrahydroazepino [3,2,1-hi]indole-1-carboxylate (5cb)**

The title compound was isolated by column chromatography (eluent: EtOAc/petroleum ether = 1/5 to 1/2) as a yellow solid in 74% yield (48.1 mg, 0.148 mmol) following the general procedure B. Mp: 153–155 °C.  **$^1\text{H}$  NMR (CDCl<sub>3</sub>, 400 MHz):**  $\delta$  6.95 (d,  $J = 8.4$  Hz, 1H), 6.63 (d,  $J = 8.4$  Hz, 1H), 4.69–4.63 (m,  $J = 12.1, 9.3, 2.9$  Hz, 1H), 4.22 (s, 1H), 4.10 (q,  $J = 7.0$  Hz, 2H), 3.98 – 3.89 (m, 1H), 3.84 (s, 3H), 3.11 – 2.94 (m, 2H), 2.53 (s, 3H), 1.18 (t,  $J = 7.1$  Hz, 3H).  **$^{13}\text{C}$  NMR (CDCl<sub>3</sub>, 100 MHz):**  $\delta$  167.77, 160.27, 159.10, 156.46, 140.15, 129.08, 120.85, 115.62, 113.40, 111.68, 107.50, 62.38, 55.56, 54.82, 49.47, 27.12, 24.45, 13.90. **HRMS (ESI):** Calcd for C<sub>18</sub>H<sub>19</sub>N<sub>2</sub>O<sub>4</sub> [M+H]<sup>+</sup> 327.1339, found: 327.1342.

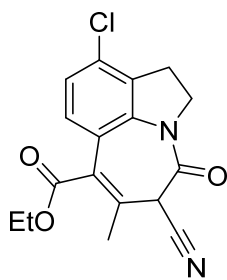

**Ethyl 8-chloro-3-cyano-2-methyl-4-oxo-3,4,6,7-tetrahydroazepino[3,2,1-hi]indole-1-carboxylate (4eb)**

The title compound was isolated by column chromatography (eluent: EtOAc/petroleum ether = 1/5 to 1/2) as a yellow solid in 24% yield (15.9 mg, 0.142 mmol) following the general procedure B. Mp: 120–122 °C. **<sup>1</sup>H NMR (CDCl<sub>3</sub>, 400 MHz):** δ 7.18 (d, *J* = 8.6 Hz, 1H), 7.11 (d, *J* = 8.6 Hz, 1H), 4.61 – 4.51 (m, 1H), 4.32 (q, *J* = 7.1 Hz, 2H), 4.11 – 4.01 (m, 1H), 3.89 (s, 1H), 3.31 – 3.13 (m, 2H), 2.30 (s, 3H), 1.33 (t, *J* = 7.1 Hz, 3H). **<sup>13</sup>C NMR (CDCl<sub>3</sub>, 100 MHz):** δ 166.85, 160.52, 140.37, 132.56, 131.49, 130.42, 129.72, 128.18, 124.75, 120.15, 113.57, 61.96, 49.29, 44.63, 27.75, 20.35, 14.10. **HRMS (ESI):** Calcd for C<sub>17</sub>H<sub>16</sub>ClN<sub>2</sub>O<sub>3</sub> [M+H]<sup>+</sup> 331.0844, found: 331.0846.

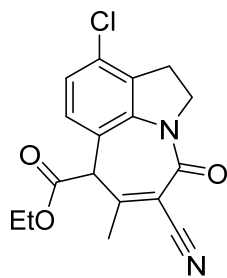

**Ethyl 8-chloro-3-cyano-2-methyl-4-oxo-1,4,6,7-tetrahydroazepino[3,2,1-hi]indole-1-carboxylate (5eb)**

The title compound was isolated by column chromatography (eluent: EtOAc/petroleum ether = 1/5 to 1/2) as a yellow solid in 76% yield (50.2 mg, 0.152 mmol) following the general procedure B. Mp: 94–96 °C. **<sup>1</sup>H NMR (CDCl<sub>3</sub>, 400 MHz):** δ 7.06 (d, *J* = 8.2 Hz, 1H), 6.95 (d, *J* = 8.1 Hz, 1H), 4.71 – 4.60 (m, 1H), 4.28 (s, 1H), 4.09 (q, *J* = 7.0 Hz, 2H), 3.99 – 3.90 (m, 1H), 3.23 – 3.13 (m, 1H), 3.13 – 3.03 (m, 1H), 2.53 (s, 3H), 1.17 (t, *J* = 7.1 Hz, 3H). **<sup>13</sup>C NMR (CDCl<sub>3</sub>, 100 MHz):** δ 167.02, 160.28, 158.95, 140.05, 132.19, 131.38, 129.19, 125.20, 118.91, 115.23, 111.57, 62.55, 54.58, 48.73, 27.11, 26.74, 13.79. **HRMS (ESI):** Calcd for C<sub>17</sub>H<sub>16</sub>ClN<sub>2</sub>O<sub>3</sub> [M+H]<sup>+</sup> 331.0844, found: 331.0847.

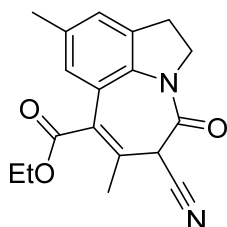

**Ethyl 3-cyano-2,9-dimethyl-4-oxo-3,4,6,7-tetrahydroazepino[3,2,1-hi]indole-1-carboxylate (4hb)**

The title compound was isolated by column chromatography (eluent: EtOAc/petroleum ether = 1/5 to 1/2) as a yellow solid in 17% yield (10.8 mg, 0.034 mmol) following the general procedure B. Mp: 131–134°C. **<sup>1</sup>H NMR (CDCl<sub>3</sub>, 400 MHz):** δ 7.13 (s, 1H), 6.98 (s, 1H), 4.56 – 4.48 (m, 1H), 4.33 (q, *J* = 7.1 Hz, 2H), 4.04 – 3.95 (m, 1H), 3.88 (s, 1H), 3.28 – 3.18 (m, 1H), 3.09–3.02 (m, 1H), 2.34 (s, 3H), 2.28 (s, 3H), 1.34

(t,  $J = 7.1$  Hz, 3H).  **$^{13}\text{C}$  NMR (CDCl<sub>3</sub>, 100 MHz):**  $\delta$  167.33, 160.34, 137.29, 134.45, 134.41, 131.07, 128.44, 126.69, 126.37, 121.44, 113.99, 61.75, 49.67, 44.50, 28.22, 21.11, 20.23, 14.12. **HRMS (ESI):** Calcd for C<sub>18</sub>H<sub>19</sub>N<sub>2</sub>O<sub>3</sub> [M+H]<sup>+</sup> 311.1390, found: 311.1393.

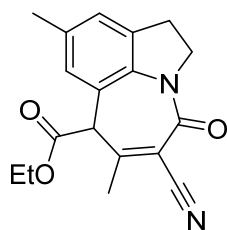

**Ethyl 3-cyano-2,9-dimethyl-4-oxo-1,4,6,7-tetrahydroazepino[3,2,1-hi]indole-1-carboxylate (5hb)**

The title compound was isolated by column chromatography (eluent: EtOAc/petroleum ether = 1/5 to 1/2) as a yellow solid in 64% yield (39.8 mg, 0.128 mmol) following the general procedure B. Mp: 90–92 °C.  **$^1\text{H}$  NMR (CDCl<sub>3</sub>, 400 MHz):**  $\delta$  7.06 (s, 1H), 6.78 (s, 1H), 4.69 – 4.59 (m, 1H), 4.22 (s, 1H), 4.09 (q,  $J = 7.1$  Hz, 2H), 3.89 (d,  $J = 11.4$  Hz, 1H), 3.24 – 3.15 (m, 1H), 2.96 (dd,  $J = 15.9, 9.3$  Hz, 1H), 2.52 (s, 3H), 2.31 (s, 3H), 1.17 (t,  $J = 7.1$  Hz, 3H).  **$^{13}\text{C}$  NMR (CDCl<sub>3</sub>, 100 MHz):**  $\delta$  164.31, 151.26, 141.72, 141.30, 136.54, 135.89, 133.47, 133.33, 130.33, 130.29, 129.45, 128.40, 127.86, 127.47, 127.31, 124.22, 123.66, 122.70, 120.07, 59.01, 58.05, 35.33, 20.86. **HRMS (ESI):** Calcd for C<sub>18</sub>H<sub>19</sub>N<sub>2</sub>O<sub>3</sub> [M+H]<sup>+</sup> 311.1390, found: 311.1397.

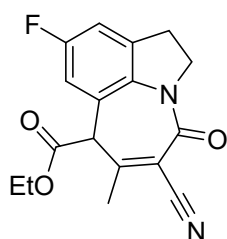

**Ethyl 3-cyano-9-fluoro-2-methyl-4-oxo-1,4,6,7-tetrahydroazepino[3,2,1-hi]indole-1-carboxylate (5jb)**

The title compound was isolated by column chromatography (eluent: EtOAc/petroleum ether = 1/5 to 1/2) as a yellow solid in 90% yield (56.8mg, 0.180 mmol) following the general procedure B. Mp: 159–161 °C.  **$^1\text{H}$  NMR (CDCl<sub>3</sub>, 400 MHz):**  $\delta$  6.98 (d,  $J = 7.4$  Hz, 1H), 6.73 (dd,  $J = 8.7, 2.1$  Hz, 1H), 4.75–4.64 (m, 1H), 4.22 (s, 1H), 4.17–4.07 (m, 2H), 4.00–3.89 (m, 1H), 3.32–3.19 (m, 1H), 3.02 (dd,  $J = 16.3, 9.5$  Hz, 1H), 2.54 (s, 3H), 1.24–1.15 (m, 3H).  **$^{13}\text{C}$  NMR (CDCl<sub>3</sub>, 100 MHz):**  $\delta$  166.87, 161.43, 159.58, 158.99, 158.68, 136.16, 136.07, 135.38, 121.79, 121.71, 115.34, 114.37, 114.12, 113.23, 113.00, 111.71, 62.66, 54.69, 49.54, 27.71, 27.15, 13.86.  **$^{19}\text{F}$  NMR (CDCl<sub>3</sub>, 376 MHz):**  $\delta$  -117.02 (d,  $J = 8.4$  Hz). **HRMS (ESI):** Calcd for C<sub>17</sub>H<sub>16</sub>FN<sub>2</sub>O<sub>3</sub> [M+H]<sup>+</sup> 315.1139, found: 315.1144.

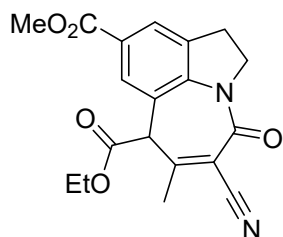

**1-Ethyl-9-methyl**

**3-cyano-2-methyl-4-oxo-1,4,6,7-**

**tetrahydroazepino[3,2,1-hi]indole-1,9-dicarboxylate (5lb)**

The title compound was isolated by column chromatography (eluent: EtOAc/petroleum ether = 1/5 to 1/2) as a yellow solid in 84% yield

(51.9 mg, 0.168 mmol) following the general procedure B. Mp: 104–106 °C. **<sup>1</sup>H NMR (CDCl<sub>3</sub>, 400 MHz):** δ 7.91 (s, 1H), 7.73 (s, 1H), 4.74 – 4.63 (m, 1H), 4.35 (s, 1H), 4.11 (q, *J* = 7.1 Hz, 2H), 3.99 (d, *J* = 11.9 Hz, 1H), 3.90 (s, 3H), 3.31 – 3.21 (m, 1H), 3.13 – 3.03 (m, 1H), 2.56 (s, 3H), 1.18 (t, *J* = 7.1 Hz, 3H). **<sup>13</sup>C NMR (CDCl<sub>3</sub>, 100 MHz):** δ 167.00, 165.90, 160.19, 159.16, 142.83, 134.31, 130.21, 127.19, 126.88, 120.25, 115.19, 111.80, 62.69, 55.13, 52.27, 49.56, 27.16, 26.90, 13.87. **HRMS (ESI):** Calcd for C<sub>19</sub>H<sub>19</sub>N<sub>2</sub>O<sub>5</sub> [M+H]<sup>+</sup> 355.1288, found: 355.1291.

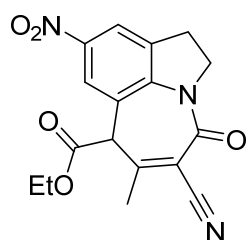

**Ethyl 3-cyano-2-methyl-9-nitro-4-oxo-1,4,6,7-tetrahydroazepino [3,2,1-hi]indole-1-carboxylate (5pb)**

The title compound was isolated by column chromatography (eluent:

EtOAc/petroleum ether = 1/5 to 1/2) as a yellow solid in 77% yield (52.3mg, 0.154 mmol) following the general procedure B. Mp:

184–186 °C. **<sup>1</sup>H NMR (CDCl<sub>3</sub>, 400 MHz):** δ 8.13 (s, 1H), 7.98 (d, *J* =

1.9 Hz, 1H), 4.79 – 4.70 (m, 1H), 4.40 (s, 1H), 4.15 (q, *J* = 7.0 Hz, 2H), 4.11-4.03 (m, 1H), 3.38-3.29 (m, 1H), 3.21-3.13 (m, 1H), 2.60 (s, 3H), 1.22 (t, *J* = 7.1 Hz, 3H). **<sup>13</sup>C NMR (CDCl<sub>3</sub>, 100 MHz):** δ 166.57, 160.14, 159.13, 144.90, 144.48, 135.66, 124.78, 121.37, 120.59, 114.92, 112.01, 63.22, 54.93, 50.09, 27.37, 26.97, 13.99. **HRMS (ESI):** Calcd for C<sub>17</sub>H<sub>15</sub>N<sub>3</sub>O<sub>5</sub>Na [M+H]<sup>+</sup> 364.0904, found: 364.0910.

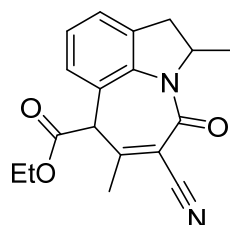

**Ethyl 3-cyano-2,6-dimethyl-4-oxo-3,4,6,7-tetrahydroazepino[3,2,1-hi]indole-1-carboxylate (4mb)**

The title compound was isolated by column chromatography (eluent:

EtOAc/petroleum ether = 1/5 to 1/2) as a yellow solid in 10% yield (6.2

mg, 0.020 mmol) following the general procedure B. Mp: 74–76 °C. **<sup>1</sup>H NMR (CDCl<sub>3</sub>, 400 MHz):** δ 7.33 – 7.28 (m, 1H), 7.23 (d, *J* = 7.9 Hz, 1H), 7.17 – 7.10 (m, 1H), 5.02 – 4.92 (m, 1H), 4.33 (q, *J* = 7.1 Hz, 2H), 3.76 (s, 1H), 3.49 (dd, *J* = 16.0, 8.8 Hz, 1H), 2.67 (d, *J* = 16.1

Hz, 1H), 2.33 (s, 3H), 1.34 (t,  $J = 7.1$  Hz, 3H), 1.27 (d,  $J = 6.6$  Hz, 3H).  **$^{13}\text{C}$  NMR (CDCl<sub>3</sub>, 100 MHz):**  $\delta$  167.23, 160.66, 138.10, 133.19, 130.86, 129.23, 126.75, 125.85, 124.44, 122.18, 114.20, 61.78, 57.94, 44.77, 35.96, 20.77, 19.84, 14.12. **HRMS (ESI):** Calcd for C<sub>18</sub>H<sub>18</sub>N<sub>2</sub>O<sub>3</sub>Na [M+Na]<sup>+</sup> 333.1215, found: 333.1214.

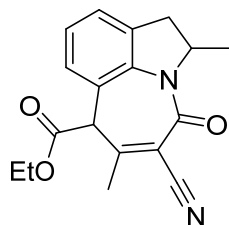

**Ethyl 3-cyano-2,6-dimethyl-4-oxo-1,4,6,7-tetrahydroazepino[3,2,1-hi]indole-1-carboxylate (5mb)**

The title compound was isolated by column chromatography (eluent: EtOAc/petroleum ether = 1/5 to 1/2) as a yellow solid in 80% yield (49.6 mg, 0.160 mmol) following the general procedure B. Mp: 123–125 °C.  **$^1\text{H}$  NMR (CDCl<sub>3</sub>, 400 MHz):**  $\delta$  7.27 (d,  $J = 6.7$  Hz, 1H), 7.12 (t,  $J = 7.5$  Hz, 1H), 7.00 (d,  $J = 7.6$  Hz, 1H), 5.10 – 5.00 (m, 1H), 4.29 (s, 1H), 4.16 – 4.05 (m, 2H), 3.41 (dd,  $J = 16.0, 8.6$  Hz, 1H), 2.61 (d,  $J = 16.1$  Hz, 1H), 2.55 (s, 3H), 1.28 (d,  $J = 6.5$  Hz, 3H), 1.18 (t,  $J = 7.1$  Hz, 3H).  **$^{13}\text{C}$  NMR (CDCl<sub>3</sub>, 100 MHz):**  $\delta$  167.34, 160.33, 158.49, 137.83, 132.74, 127.70, 126.05, 125.54, 121.41, 111.73, 62.40, 57.31, 55.20, 35.10, 27.11, 20.02, 13.90. **HRMS (ESI):** Calcd for C<sub>18</sub>H<sub>18</sub>N<sub>2</sub>O<sub>3</sub>Na [M+Na]<sup>+</sup> 333.1215, found: 333.1213.

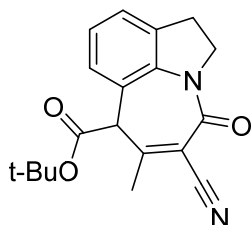

**tert-Butyl 3-cyano-2-methyl-4-oxo-1,4,6,7-tetrahydroazepino[3,2,1-hi]indole-1-carboxylate (5ac)**

The title compound was isolated by column chromatography (eluent: EtOAc/petroleum ether = 1/5 to 1/2) as a yellow solid in 70% yield (49.4 mg, 0.182 mmol) following the general procedure B. Mp: 137–138 °C.  **$^1\text{H}$  NMR (CDCl<sub>3</sub>, 400 MHz):**  $\delta$  7.25 (d,  $J = 7.1$  Hz, 1H), 7.10 (t,  $J = 7.5$  Hz, 1H), 6.97 (d,  $J = 7.6$  Hz, 1H), 4.74 – 4.63 (m, 1H), 4.20 (s, 1H), 3.96 – 3.85 (m, 1H), 3.31 – 3.16 (m, 1H), 3.02 (dd,  $J = 16.0, 9.5$  Hz, 1H), 2.53 (s, 3H), 1.38 – 1.32 (m, 9H).  **$^{13}\text{C}$  NMR (CDCl<sub>3</sub>, 100 MHz):**  $\delta$  166.43, 160.96, 160.88, 159.18, 139.05, 133.83, 127.73, 125.52, 125.46, 121.47, 115.62, 111.22, 111.19, 83.52, 56.50, 49.13, 27.59. **HRMS (ESI):** Calcd for C<sub>19</sub>H<sub>21</sub>N<sub>2</sub>O<sub>3</sub> [M+H]<sup>+</sup> 325.1547, found: 325.1554.

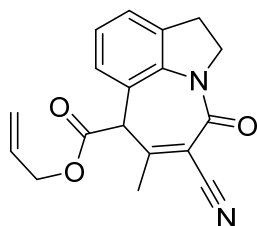

**Allyl 3-cyano-2-methyl-4-oxo-1,4,6,7-tetrahydroazepino[3,2,1-hi]indole-1-carboxylate (5ad)**

The title compound was isolated by column chromatography (eluent: EtOAc/petroleum ether = 1/5 to 1/2) as a yellow solid in 57% yield (35.2 mg, 0.114 mmol) following the general procedure B. Mp: 102–104 °C. **<sup>1</sup>H NMR (CDCl<sub>3</sub>, 400 MHz):** δ 7.27 (d, *J* = 6.8 Hz, 1H), 7.11 (t, *J* = 7.5 Hz, 1H), 7.00 (d, *J* = 7.6 Hz, 1H), 5.87 – 5.71 (m, 1H), 5.26 – 5.11 (m, 2H), 4.72 – 4.64 (m, 1H), 4.59 – 4.47 (m, 2H), 4.33 (s, 1H), 3.97 – 3.86 (m, 1H), 3.30 – 3.18 (m, 1H), 3.08 – 2.97 (m, 1H), 2.56 (s, 3H). **<sup>13</sup>C NMR (CDCl<sub>3</sub>, 100 MHz):** δ 167.04, 159.86, 159.00, 139.02, 133.96, 130.85, 127.74, 125.73, 125.54, 120.60, 119.11, 115.46, 111.88, 66.69, 55.10, 49.10, 27.33, 27.14. **HRMS (ESI):** Calcd for C<sub>19</sub>H<sub>17</sub>N<sub>2</sub>O<sub>3</sub> [M+H]<sup>+</sup> 309.1234, found:309.1235.

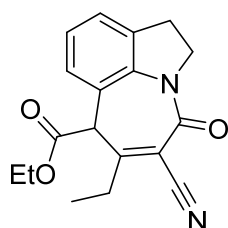

**Ethyl 3-cyano-2-ethyl-4-oxo-1,4,6,7-tetrahydroazepino[3,2,1-hi]indole-1-carboxylate (5af)**

The title compound was isolated by column chromatography (eluent: EtOAc/petroleum ether = 1/5 to 1/2) as a yellow solid in 59% yield (36.4mg, 0.118 mmol) following the general procedure D. Mp: 98–100 °C. **<sup>1</sup>H NMR (CDCl<sub>3</sub>, 400 MHz):** δ 7.25 (d, *J* = 7.7 Hz, 1H), 7.10 (t, *J* = 7.5 Hz, 1H), 7.00 (d, *J* = 7.6 Hz, 1H), 4.70–4.64 (m, 1H), 4.35 (s, 1H), 4.13 – 4.05 (m, 2H), 3.95 – 3.87 (m, 1H), 3.28–3.19 (m, 1H), 3.06 – 2.97 (m, 1H), 2.83 – 2.76 (m, 2H), 1.26 (t, *J* = 7.6 Hz, 3H), 1.16 (t, *J* = 7.1 Hz, 3H). **<sup>13</sup>C NMR (CDCl<sub>3</sub>, 100 MHz):** δ 167.53, 162.24, 159.68, 156.93, 151.39, 145.68, 145.56, 125.52, 125.43, 116.09, 115.87, 114.42, 113.66, 113.43, 112.89, 108.61, 65.94, 48.00, 37.22, 30.30, 24.07, 18.88, 13.51. **<sup>19</sup>F NMR (CDCl<sub>3</sub>, 376 MHz):** δ –108.95. **HRMS (ESI):** Calcd for C<sub>18</sub>H<sub>19</sub>N<sub>2</sub>O<sub>3</sub> [M+H]<sup>+</sup> 311.1390, found: 311.1396.

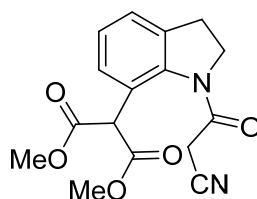

**Dimethyl 2-(1-(2-cyanoacetyl)indolin-7-yl)malonate (6ah)**

The title compound was isolated by column chromatography (eluent: EtOAc/petroleum ether = 1/5 to 1/2) as a white solid in 95% yield (60.0mg, 0.190 mmol) following the general procedure B. Mp: 202–204 °C. **<sup>1</sup>H NMR (CDCl<sub>3</sub>, 400 MHz):** δ 7.38 – 7.33 (m, 1H), 7.25 – 7.20 (m, 2H), 4.83



(s, 1H), 4.08 (t,  $J = 7.5$  Hz, 2H), 3.77 (s, 6H), 3.50 (s, 2H), 3.13 (t,  $J = 7.5$  Hz, 2H).  **$^{13}\text{C}$  NMR (CDCl<sub>3</sub>, 100 MHz):**  $\delta$  168.94, 160.83, 140.18, 134.83, 128.95, 126.78, 124.78, 123.66, 113.51, 54.90, 52.86, 51.09, 29.74, 26.70. **HRMS (ESI):** Calcd for C<sub>16</sub>H<sub>17</sub>N<sub>2</sub>O<sub>5</sub> [M+H]<sup>+</sup> 317.1132, found:317.1136.

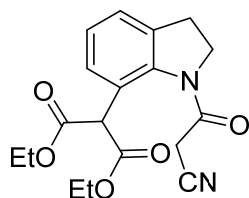

**Diethyl 2-(1-(2-cyanoacetyl)indolin-7-yl)malonate (6ai)**

The title compound was isolated by column chromatography (eluent: EtOAc/petroleum ether = 1/5 to 1/2) as a white solid in 85% yield (54.2mg, 0.170 mmol) following the general procedure B. Mp: 137–139 °C.  **$^1\text{H}$  NMR (CDCl<sub>3</sub>, 400 MHz):**  $\delta$  7.35 – 7.30 (m, 1H), 7.22 – 7.16 (m, 2H), 4.70 (s, 1H), 4.26–4.17 (m, 4H), 3.97 (t,  $J = 7.5$  Hz, 2H), 3.29 (s, 2H), 3.07 (t,  $J = 7.4$  Hz, 2H), 1.27 (t,  $J = 7.1$  Hz, 6H).  **$^{13}\text{C}$  NMR (CDCl<sub>3</sub>, 100 MHz):**  $\delta$  168.75, 161.43, 140.41, 135.23, 128.70, 126.49, 124.79, 123.66, 113.98, 61.74, 55.36, 50.83, 29.60, 26.42, 14.07. **HRMS (ESI):** Calcd for C<sub>18</sub>H<sub>21</sub>N<sub>2</sub>O<sub>5</sub> [M+H]<sup>+</sup> 345.1445, found: 345.1449.

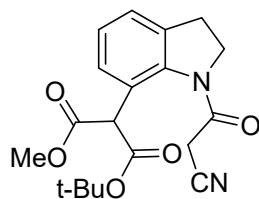

**1-(*tert*-Butyl) 3-methyl 2-(1-(2-cyanoacetyl)indolin-7-yl)malonate (6aj)**

The title compound was isolated by column chromatography (eluent: EtOAc/petroleum ether = 1/5 to 1/2) as a white solid in 47% yield (33.7 mg, 0.094 mmol ) following the general procedure B. Mp: 123–124 °C.  **$^1\text{H}$  NMR (CDCl<sub>3</sub>, 400 MHz):**  $\delta$  7.36 (dd,  $J = 5.8, 3.1$  Hz, 1H), 7.21 (d,  $J = 6.0$  Hz, 2H), 4.70 (s, 1H), 4.05 (t,  $J = 7.4$  Hz, 2H), 3.76 (s, 3H), 3.58 – 3.43 (m, 2H), 3.17 – 3.04 (m, 2H), 1.47 (s, 9H).  **$^{13}\text{C}$  NMR (CDCl<sub>3</sub>, 100 MHz):**  $\delta$  169.53, 167.54, 161.16, 140.37, 135.02, 128.76, 126.51, 124.65, 124.10, 113.89, 82.32, 56.19, 52.64, 50.91, 29.72, 27.88, 26.63. **HRMS (ESI):** Calcd for C<sub>19</sub>H<sub>22</sub>N<sub>2</sub>NaO<sub>5</sub> [M+H]<sup>+</sup> 381.1421, found: 381.1418.

### X-ray crystallography:

CCDC-1498693 (**3la**) and 1498694 (**5ab**), contain the supplementary crystallographic data. These data can be obtained free of charge from The Cambridge Crystallographic Data Centre via [www.ccdc.cam.ac.uk/data\\_request/cif](http://www.ccdc.cam.ac.uk/data_request/cif).

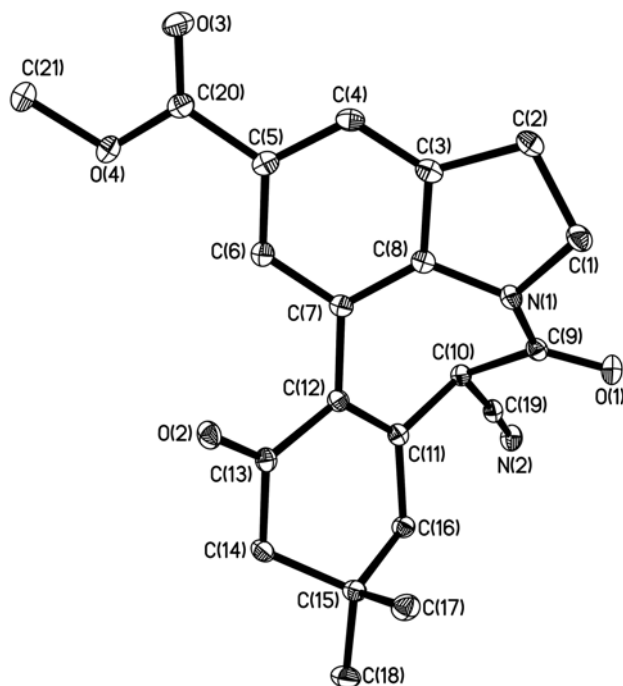

**Figure S1.** The molecular structure of **3la**. Thermal ellipsoids are shown at the 30% level. Hydrogen atoms have been omitted for clarity.

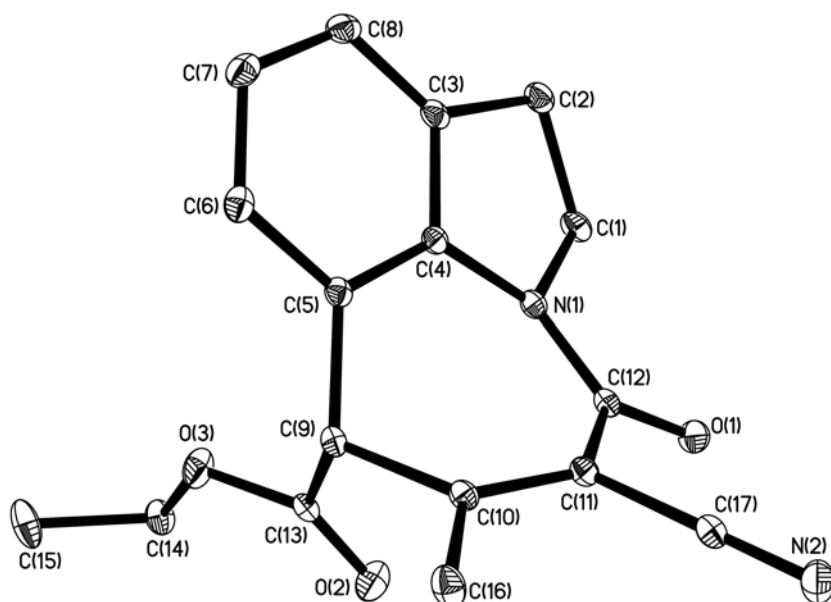

**Figure S2.** The molecular structure of **5ab**. Thermal ellipsoids are shown at the 30% level. Hydrogen atoms have been omitted for clarity.

# Spectral Copies of $^1\text{H}$ , $^{13}\text{C}$ , and $^{19}\text{F}$ NMR of Compounds Obtained in This Study

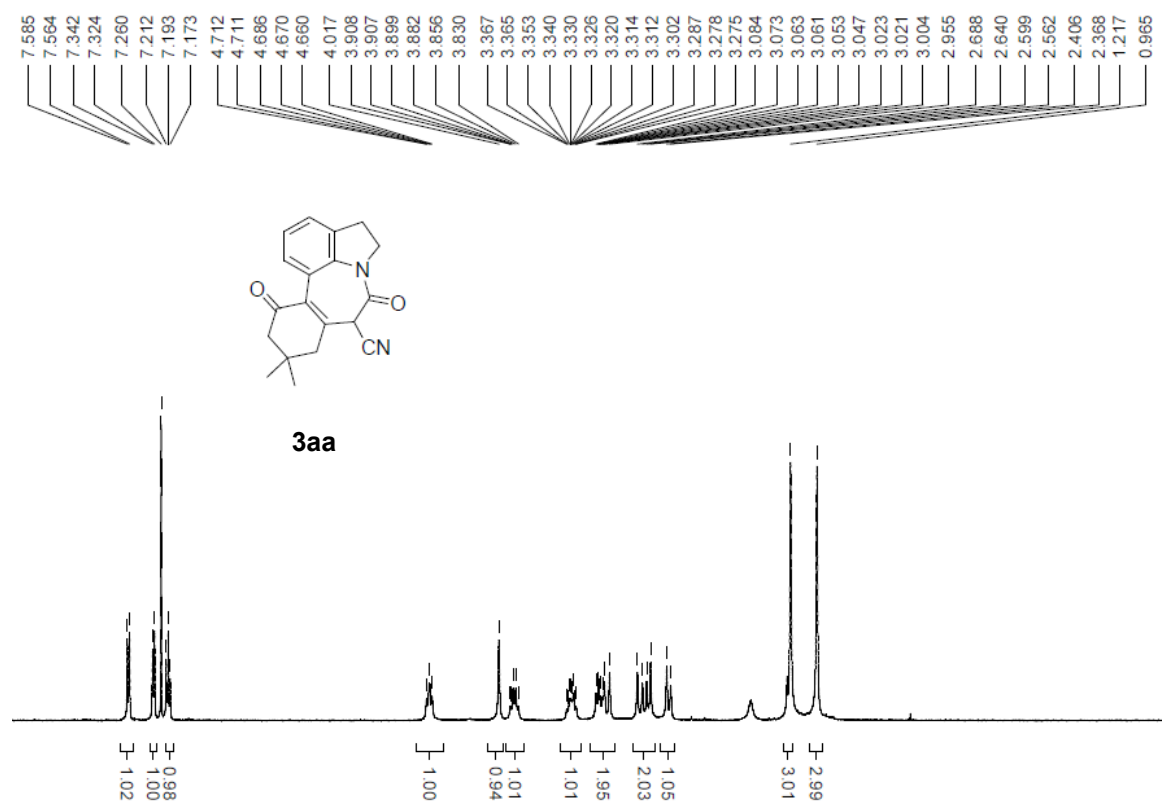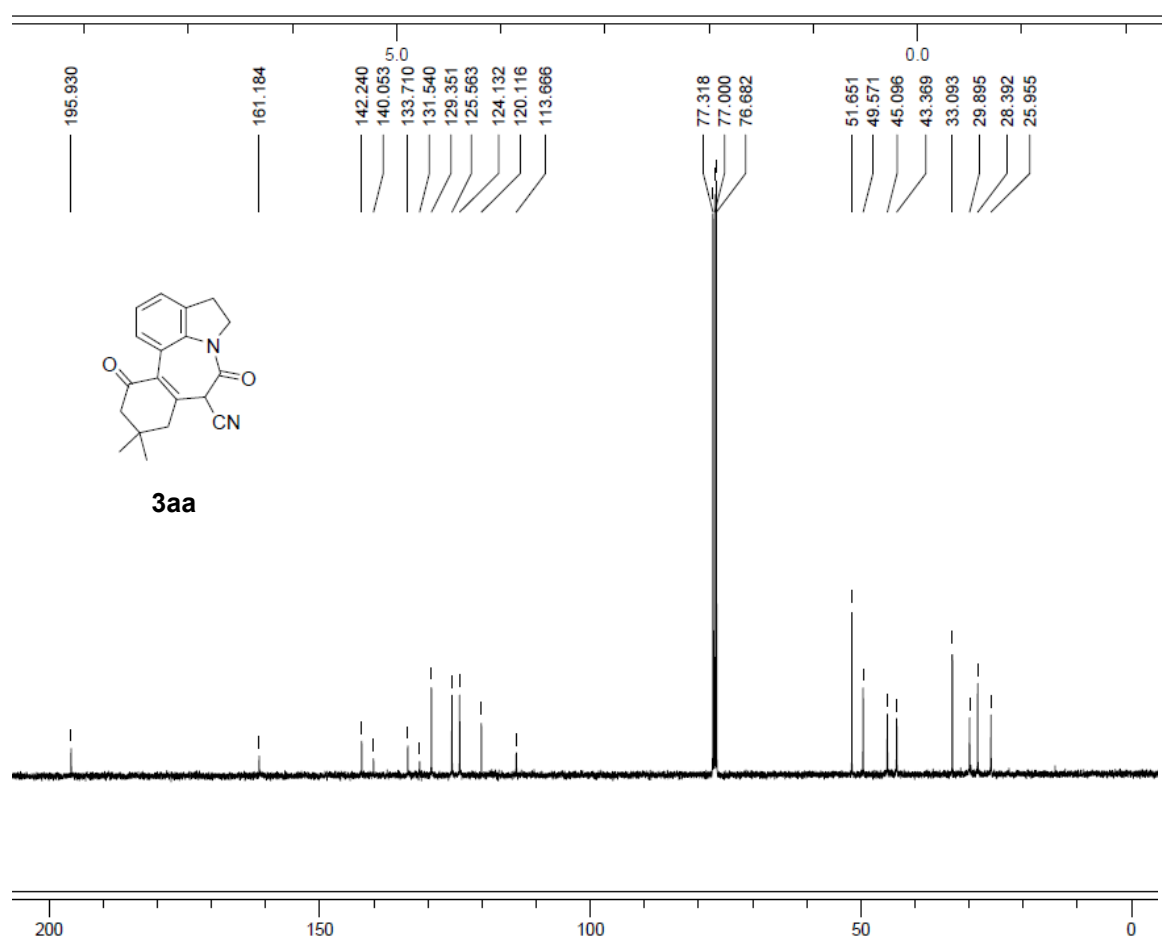

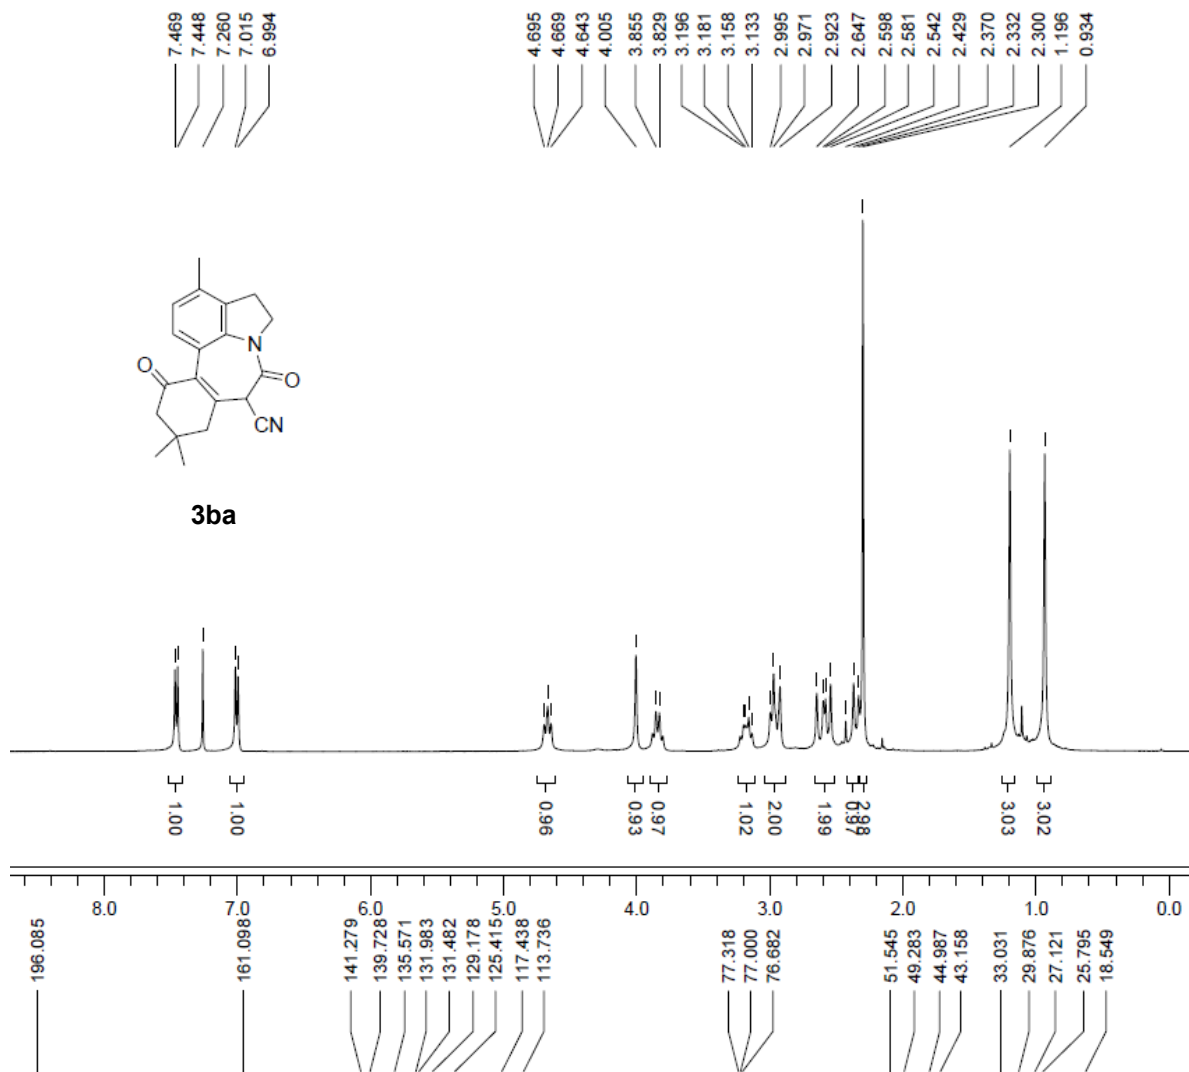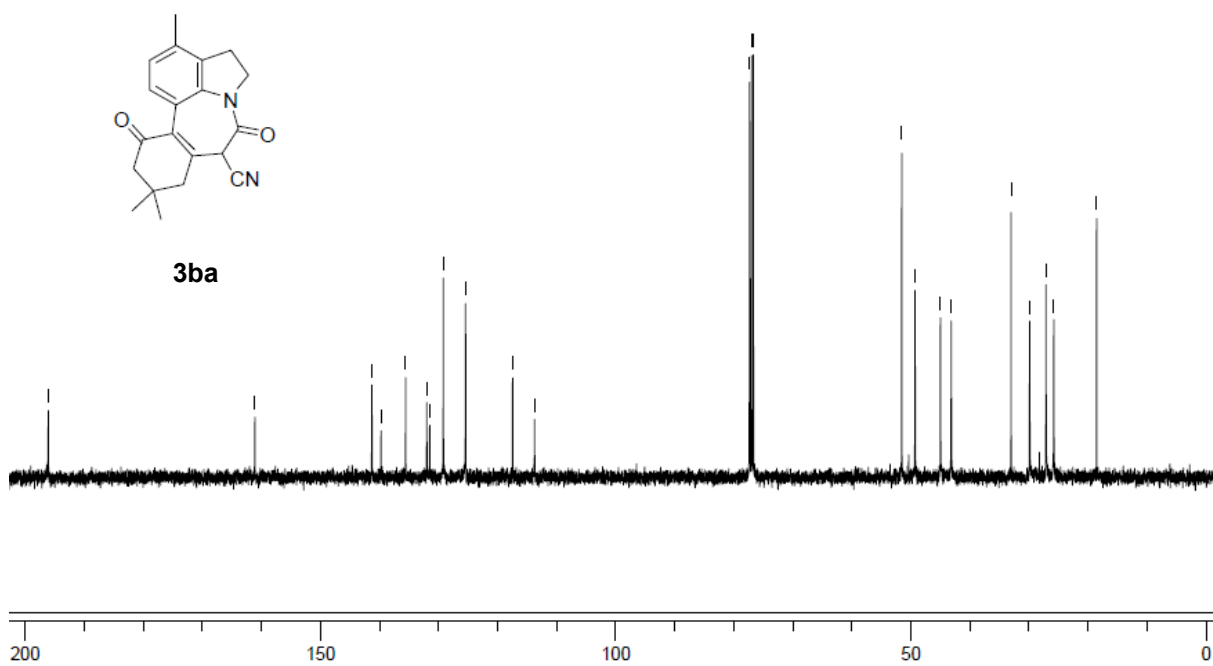

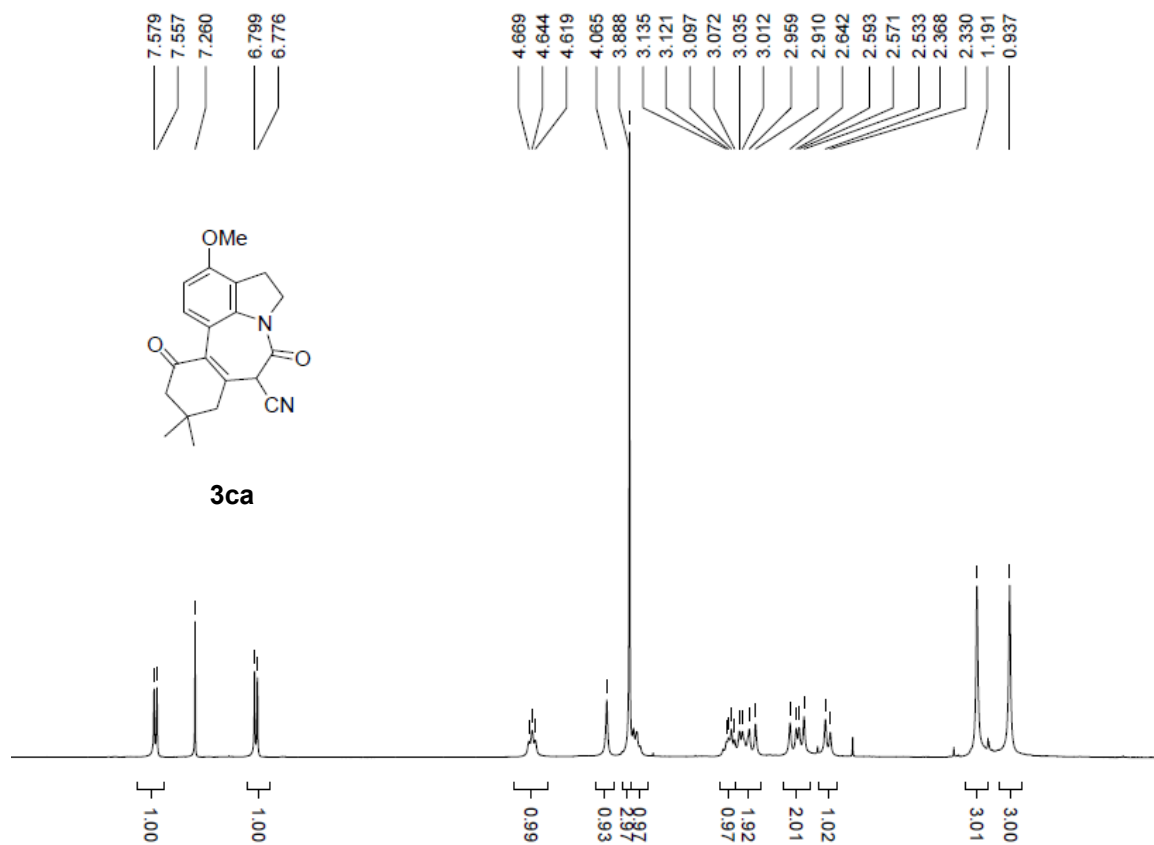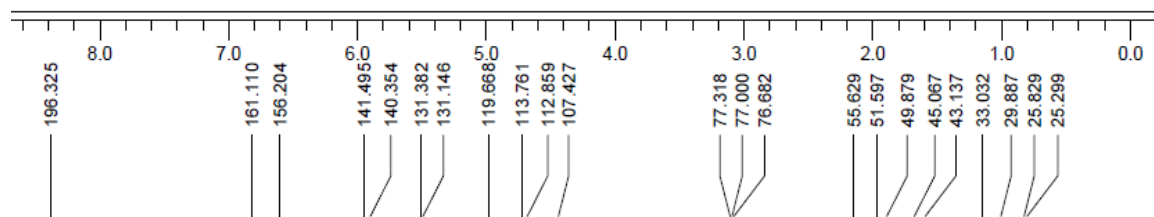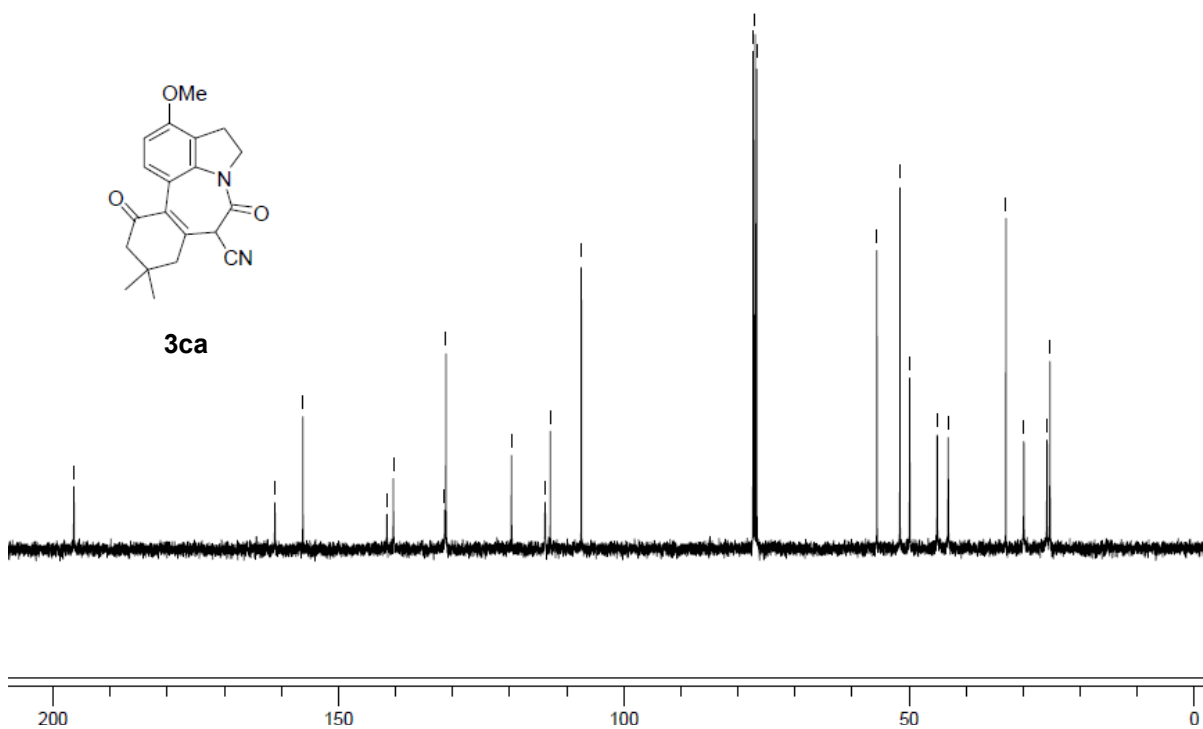

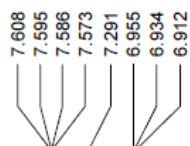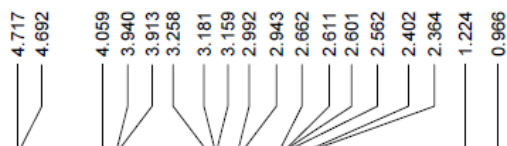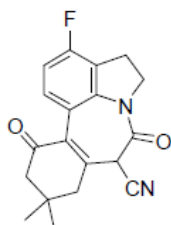

**3da**

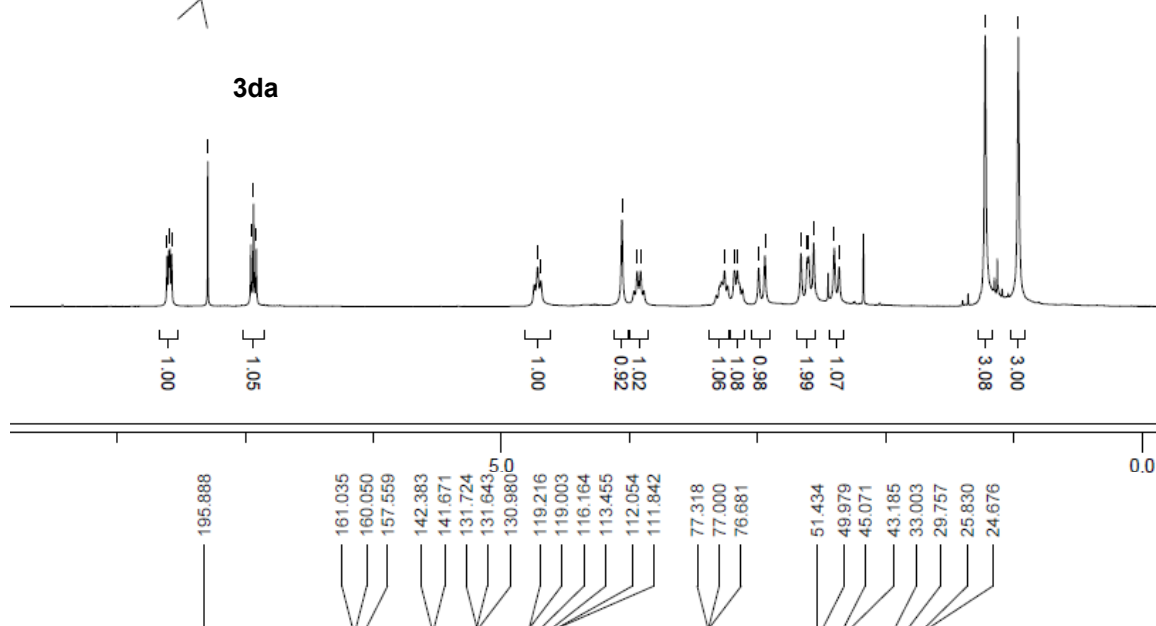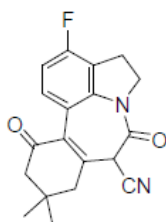

**3da**

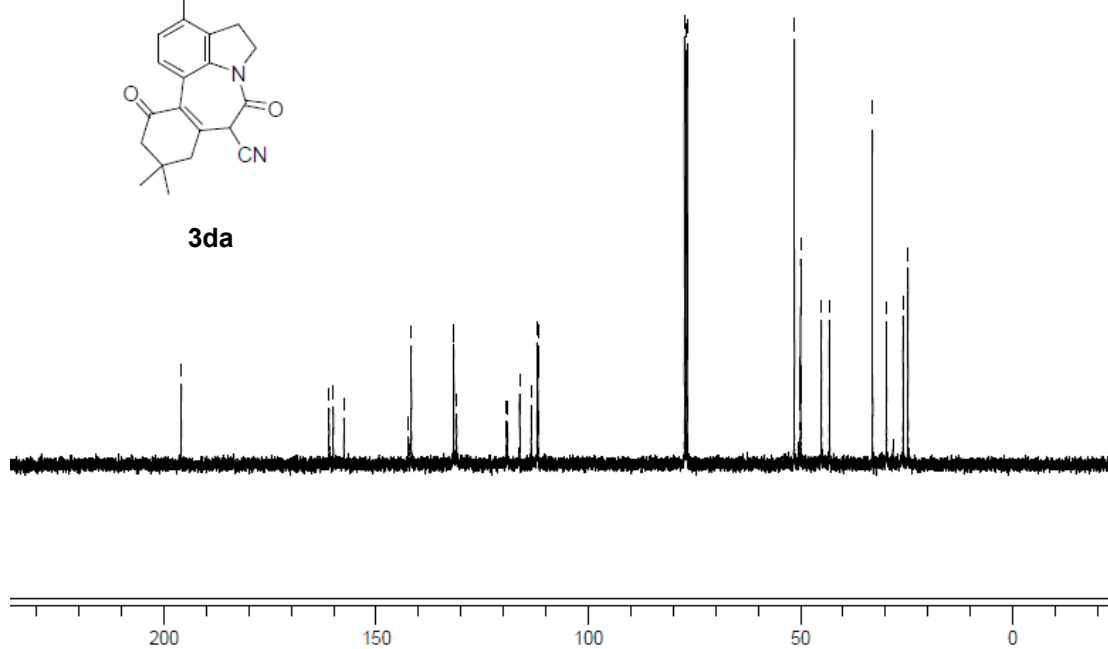

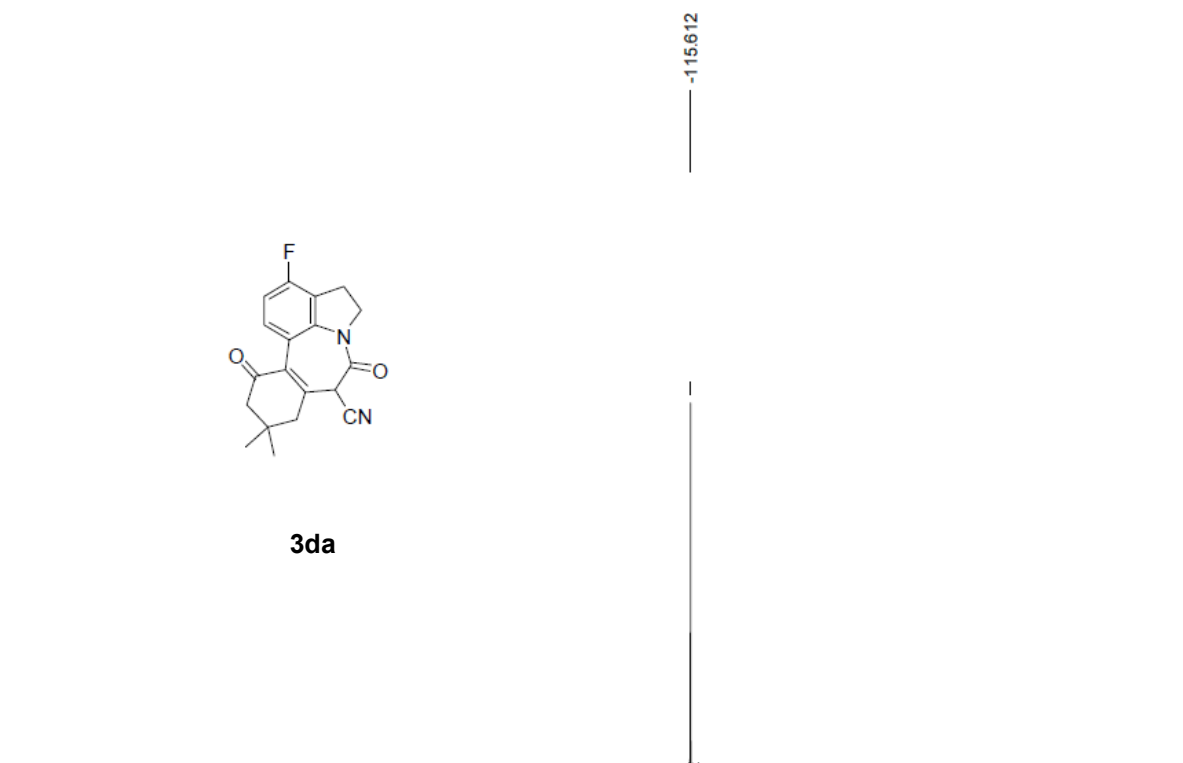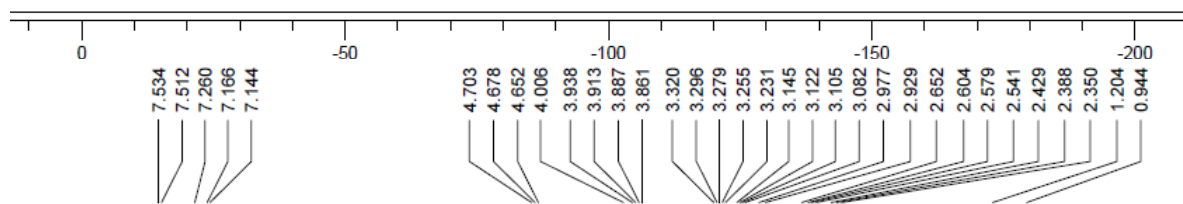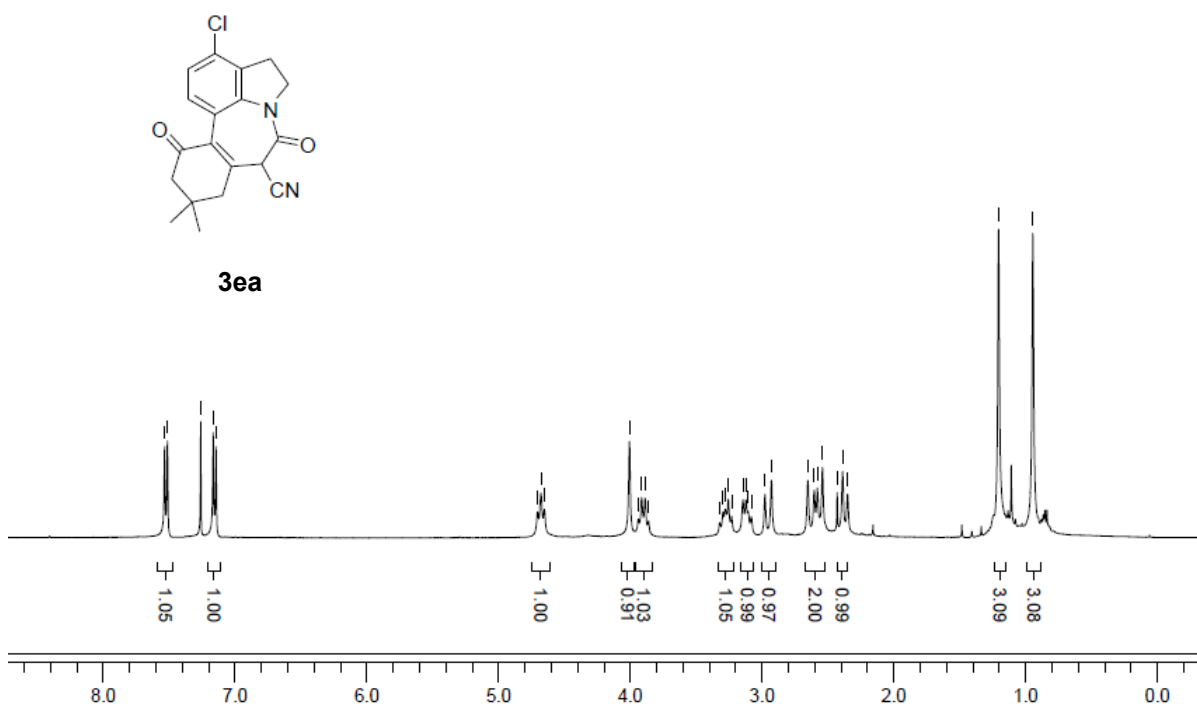

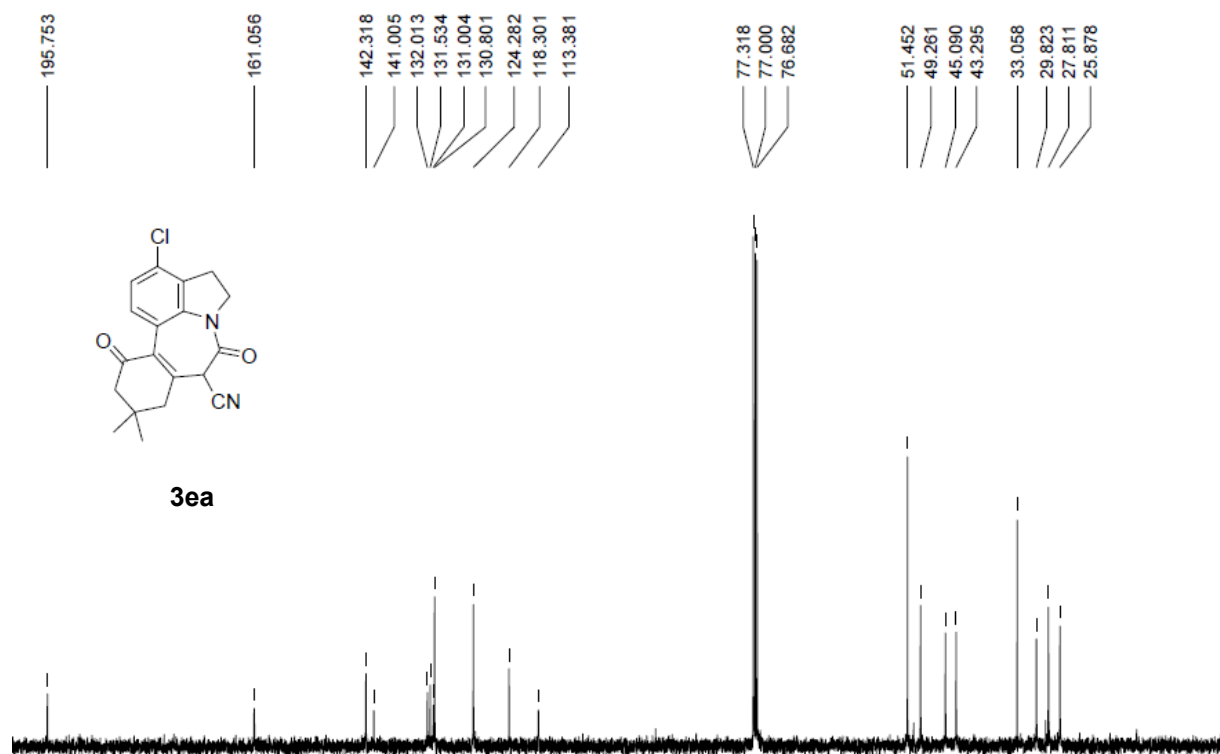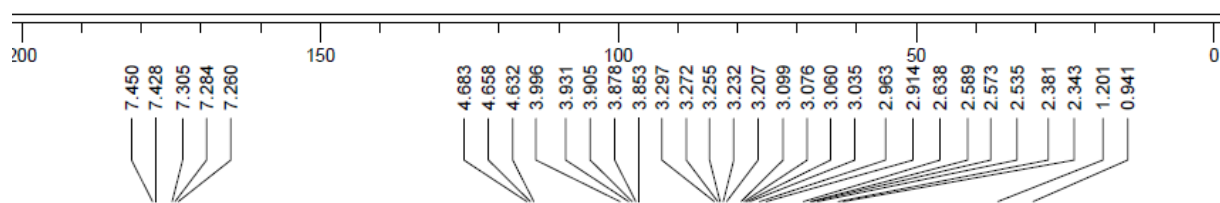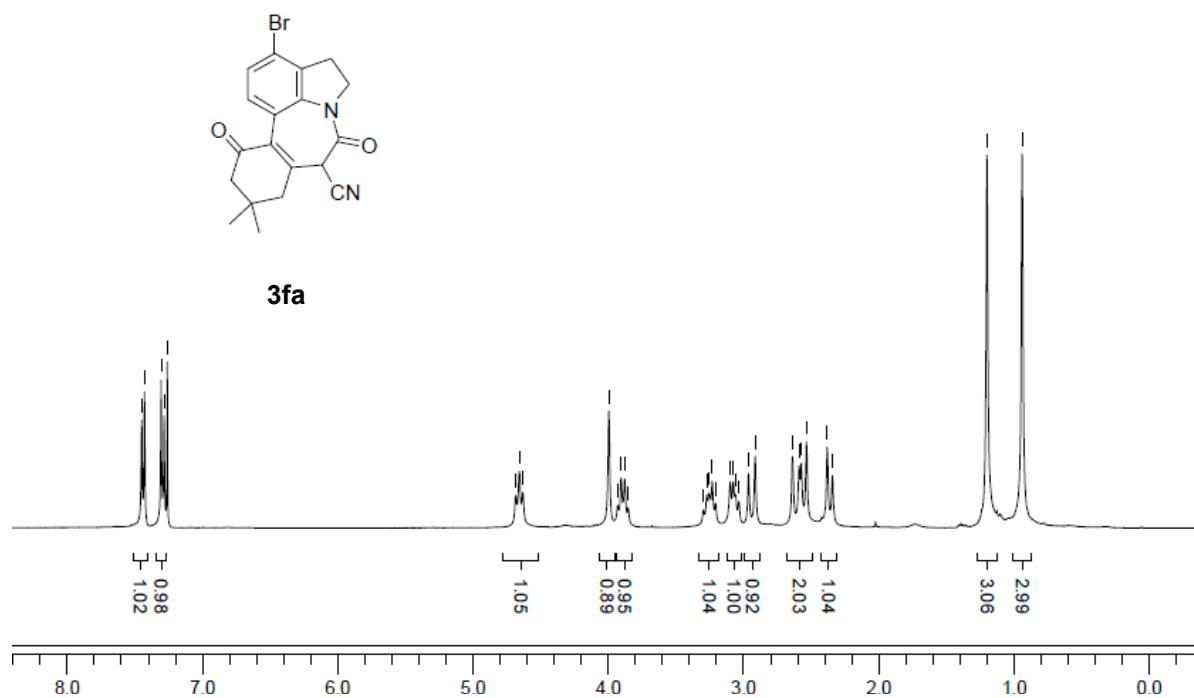



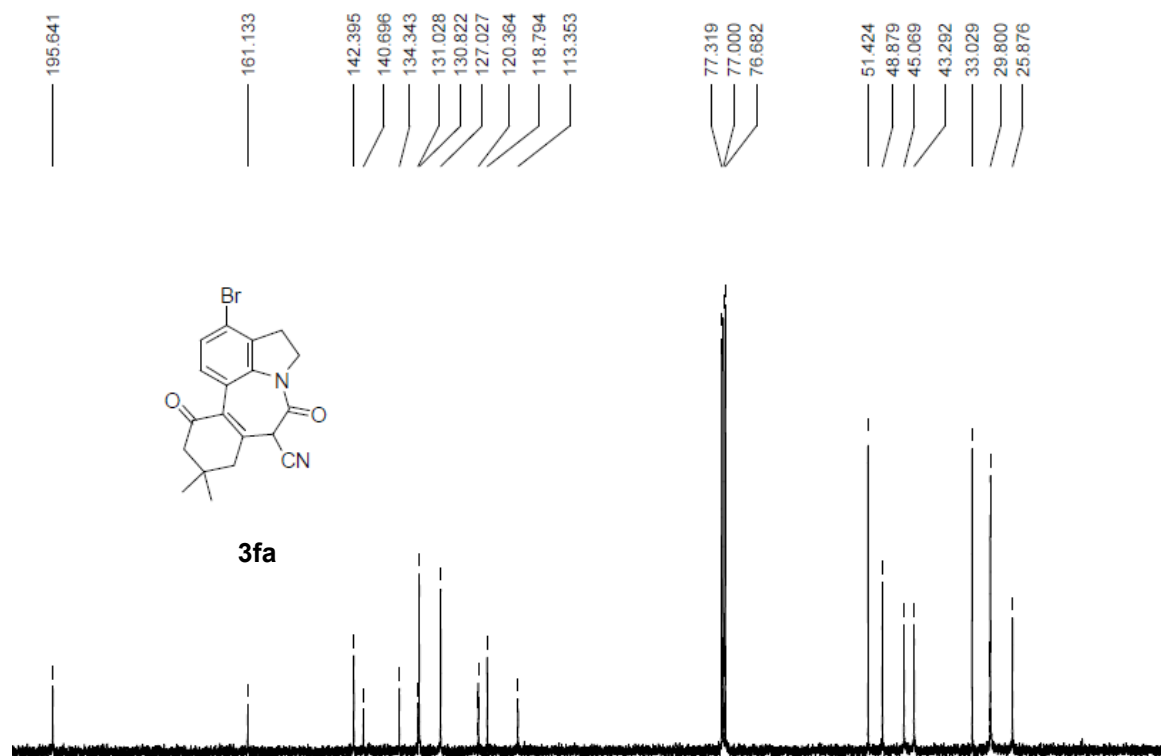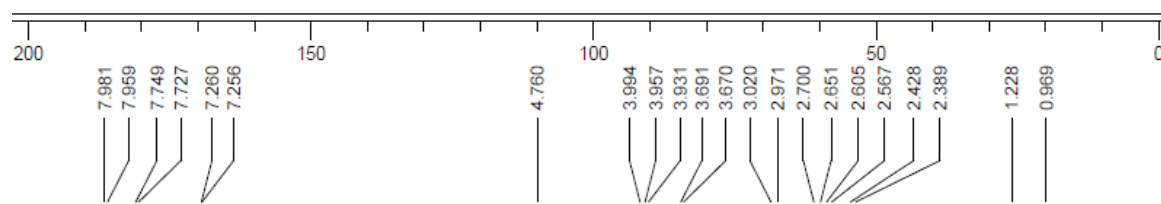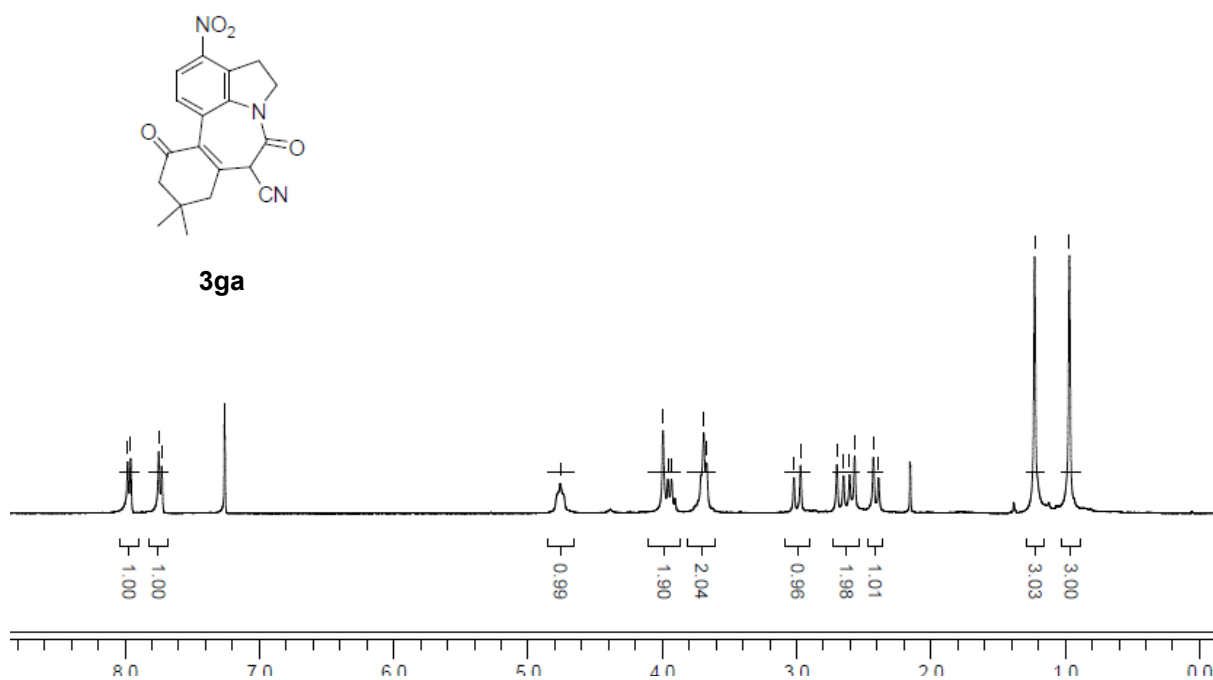

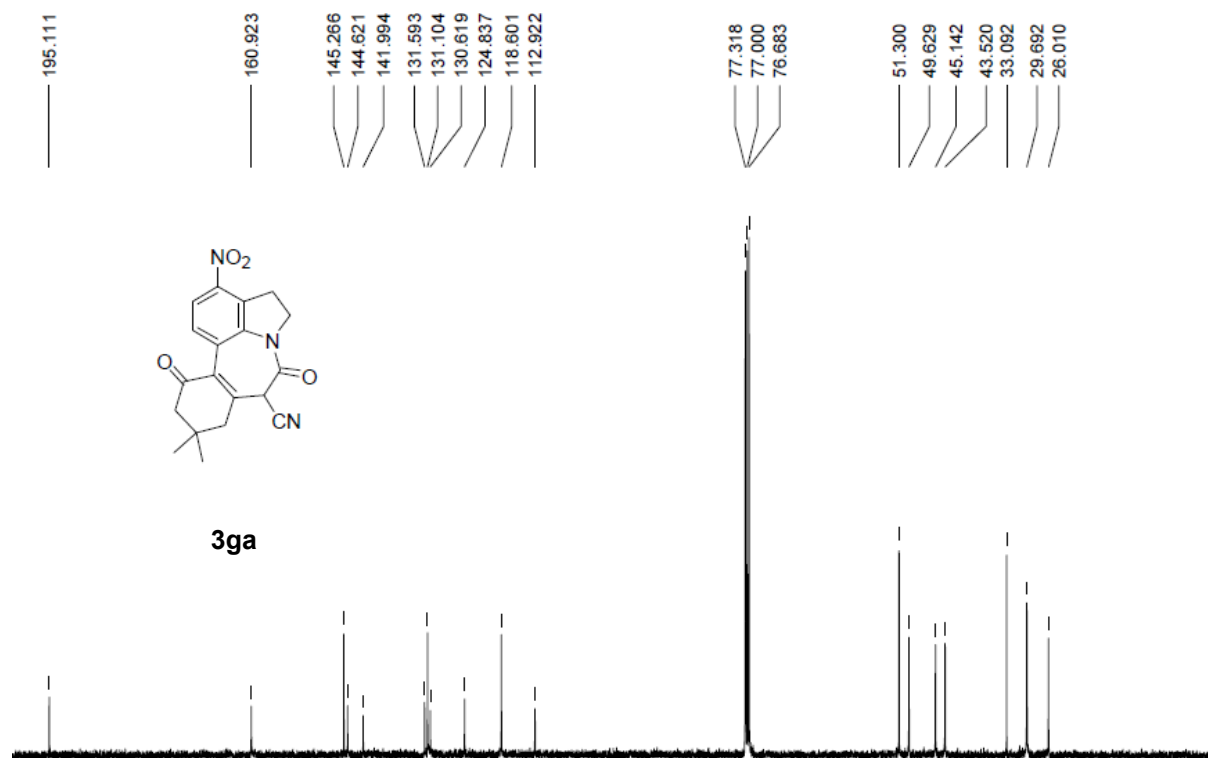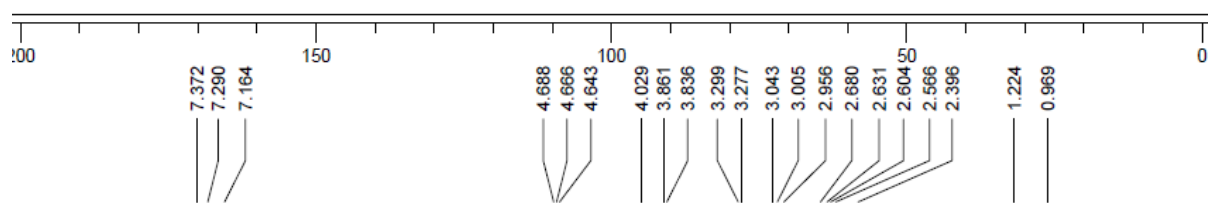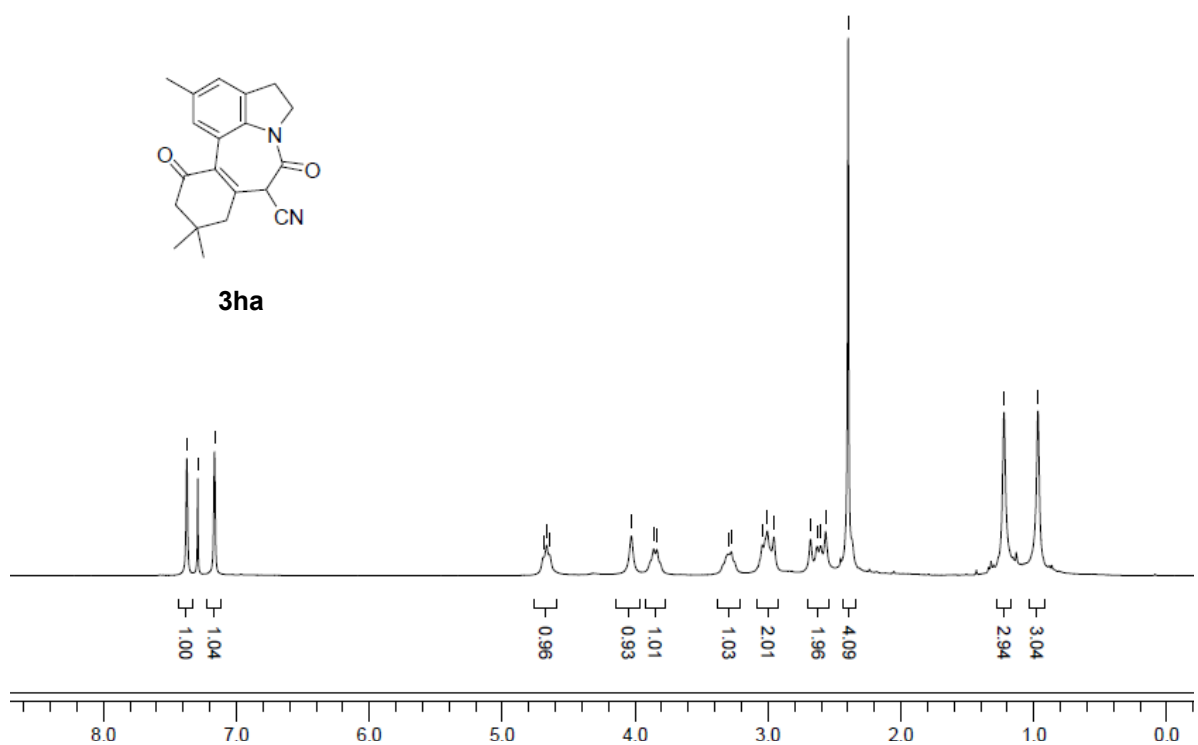

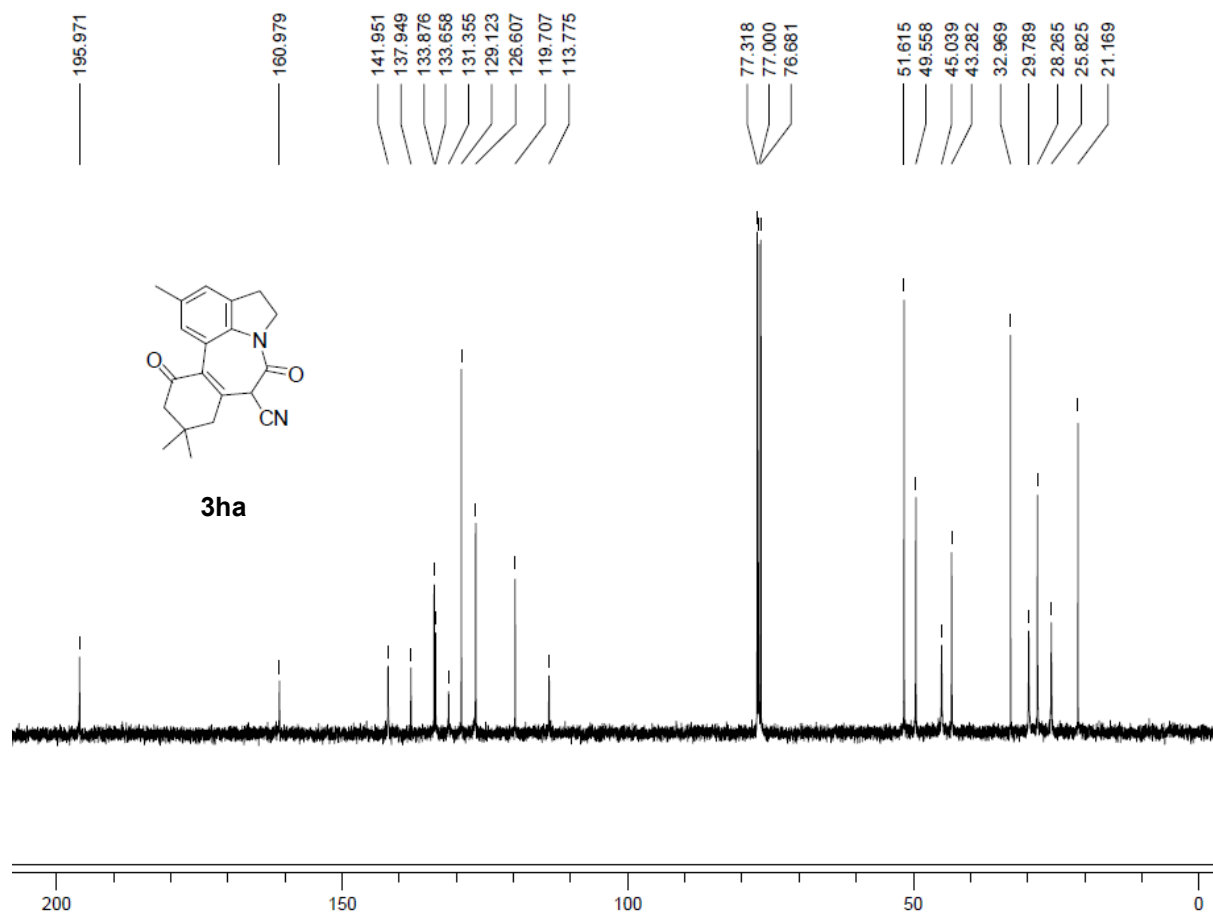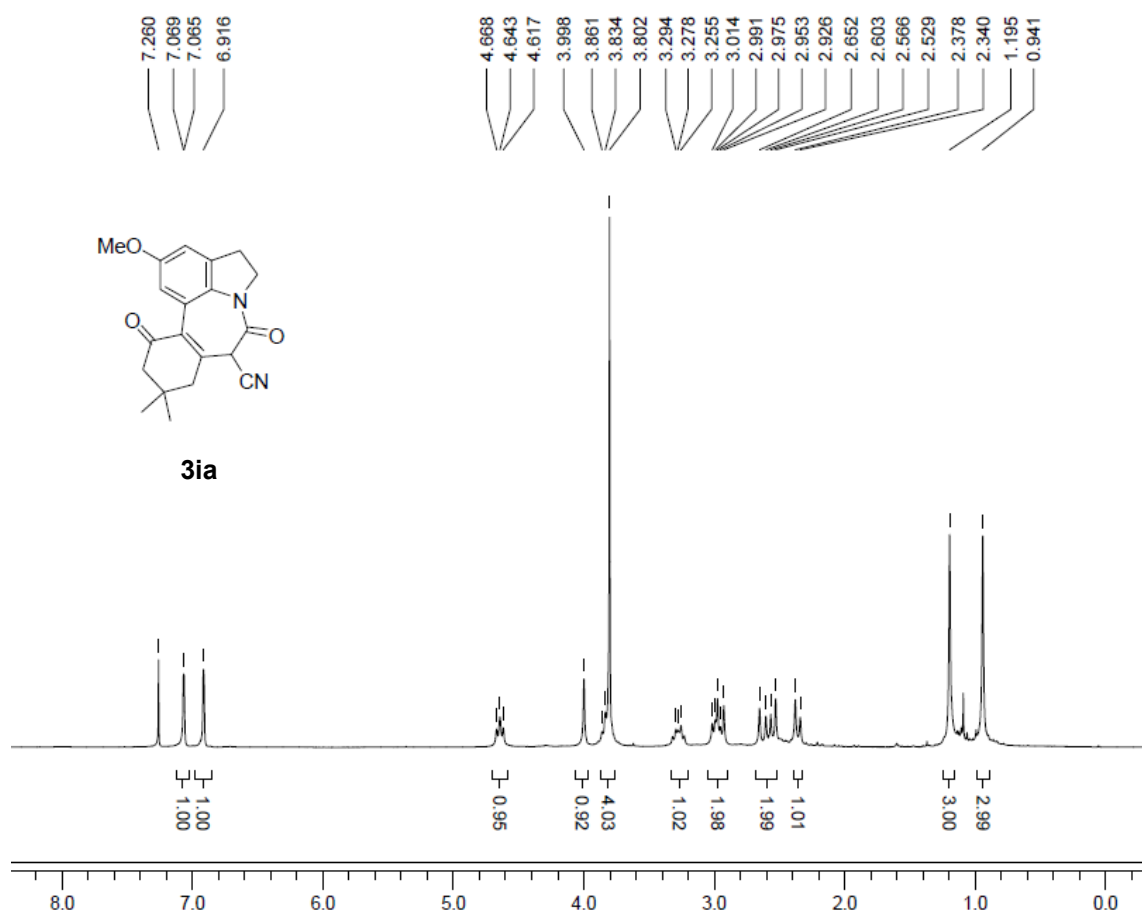

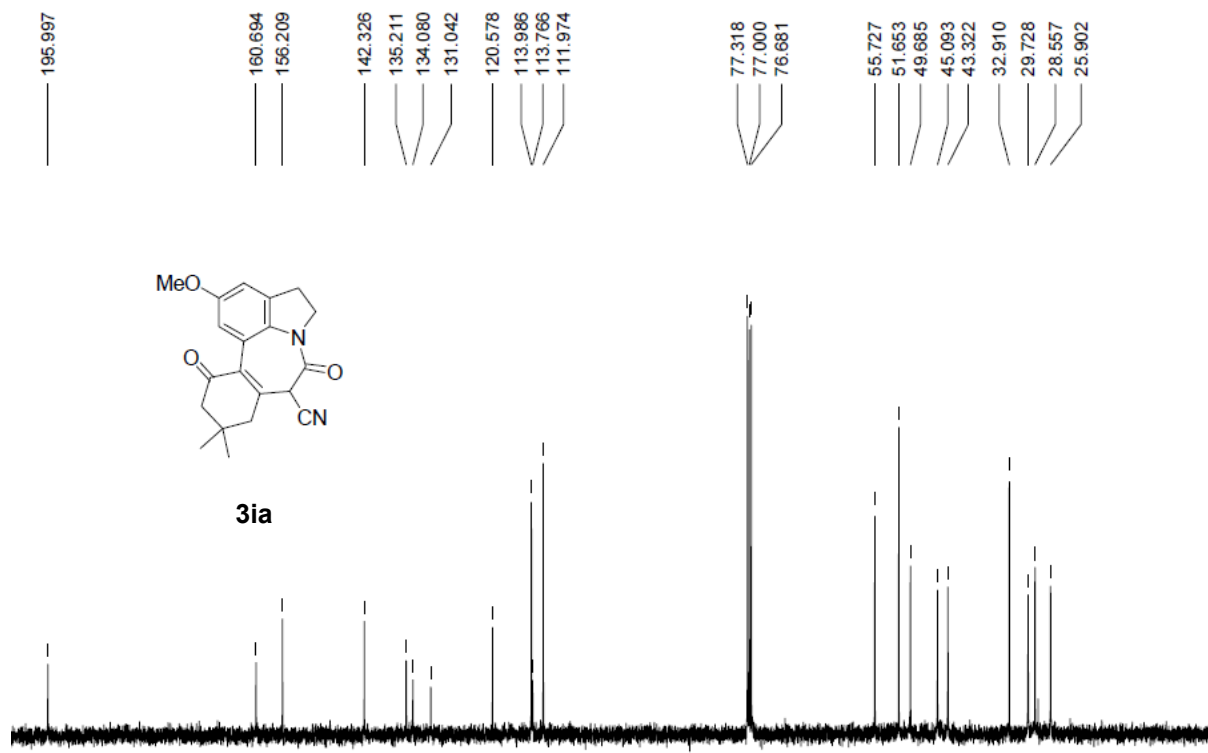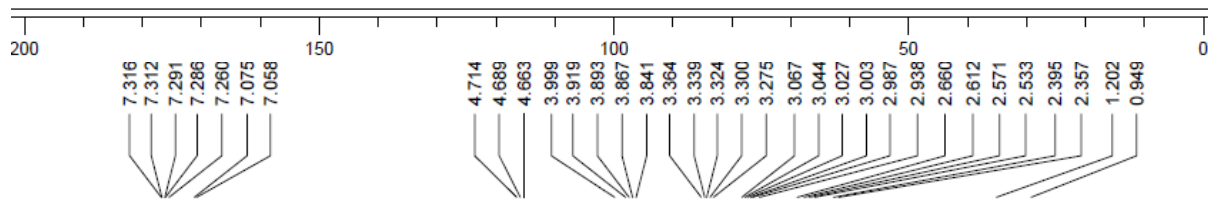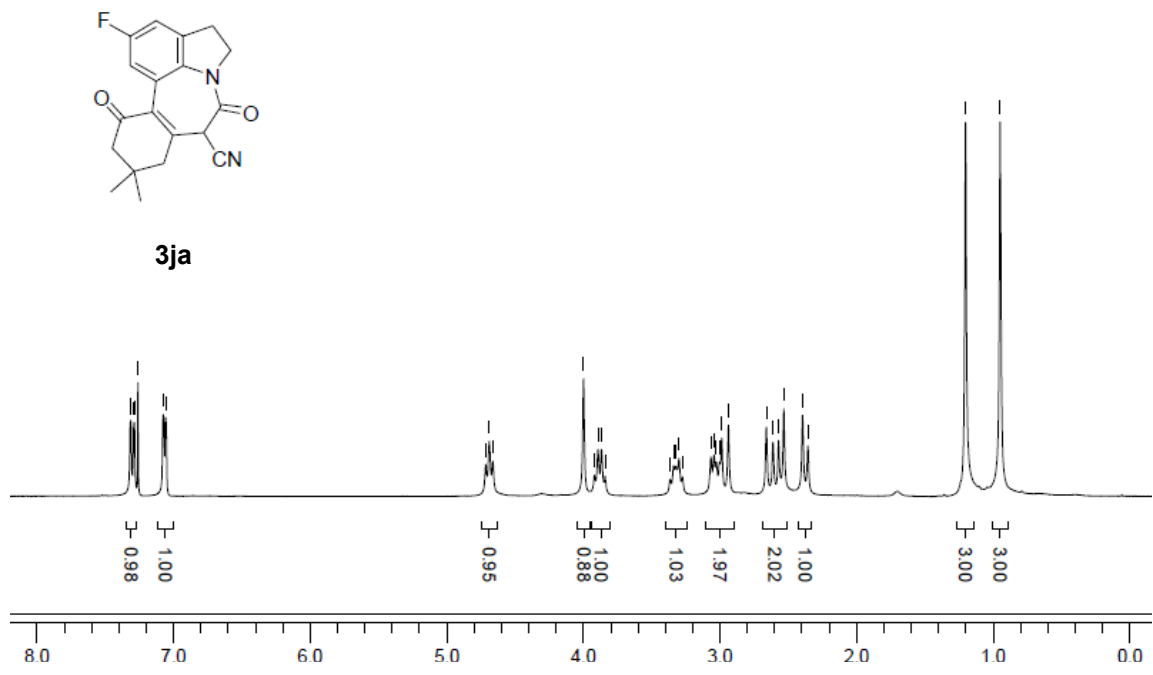

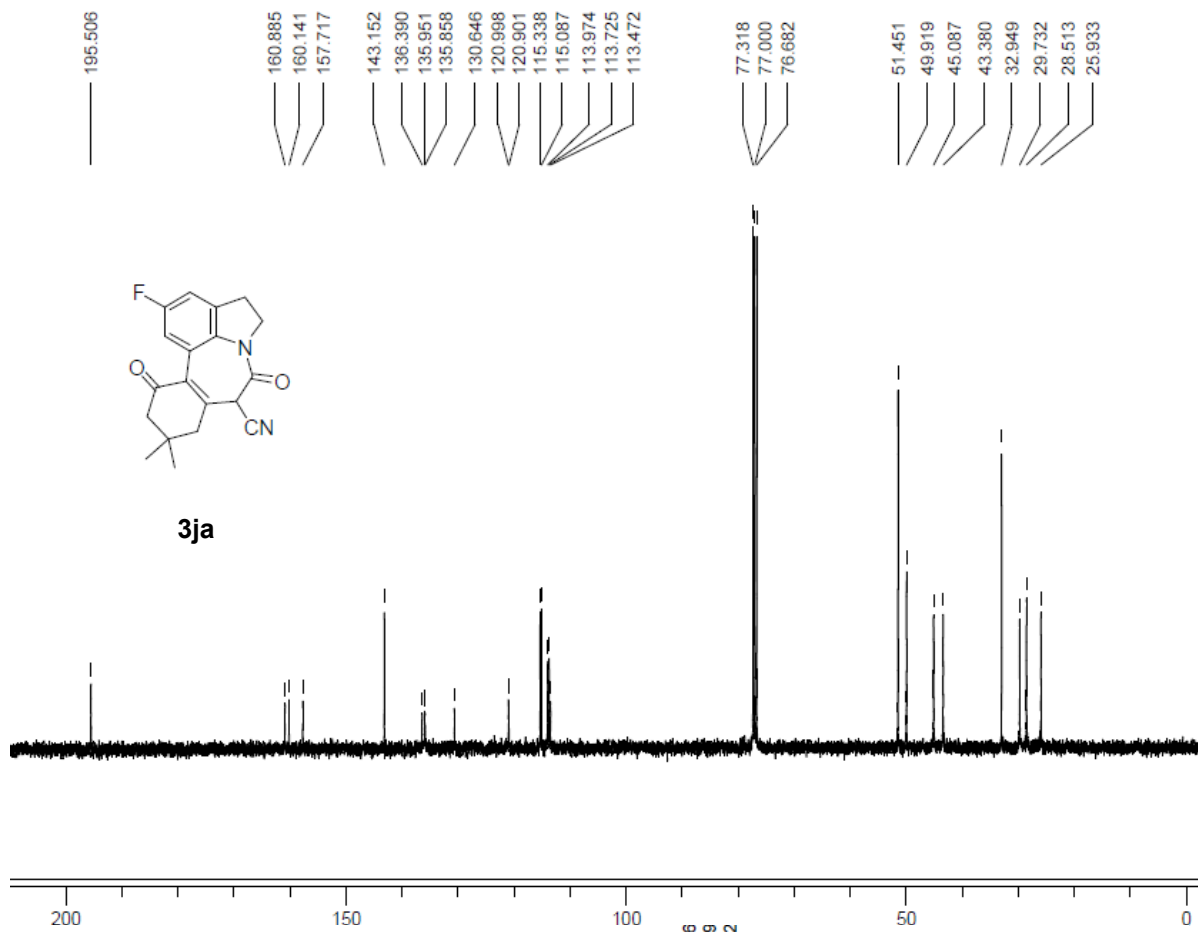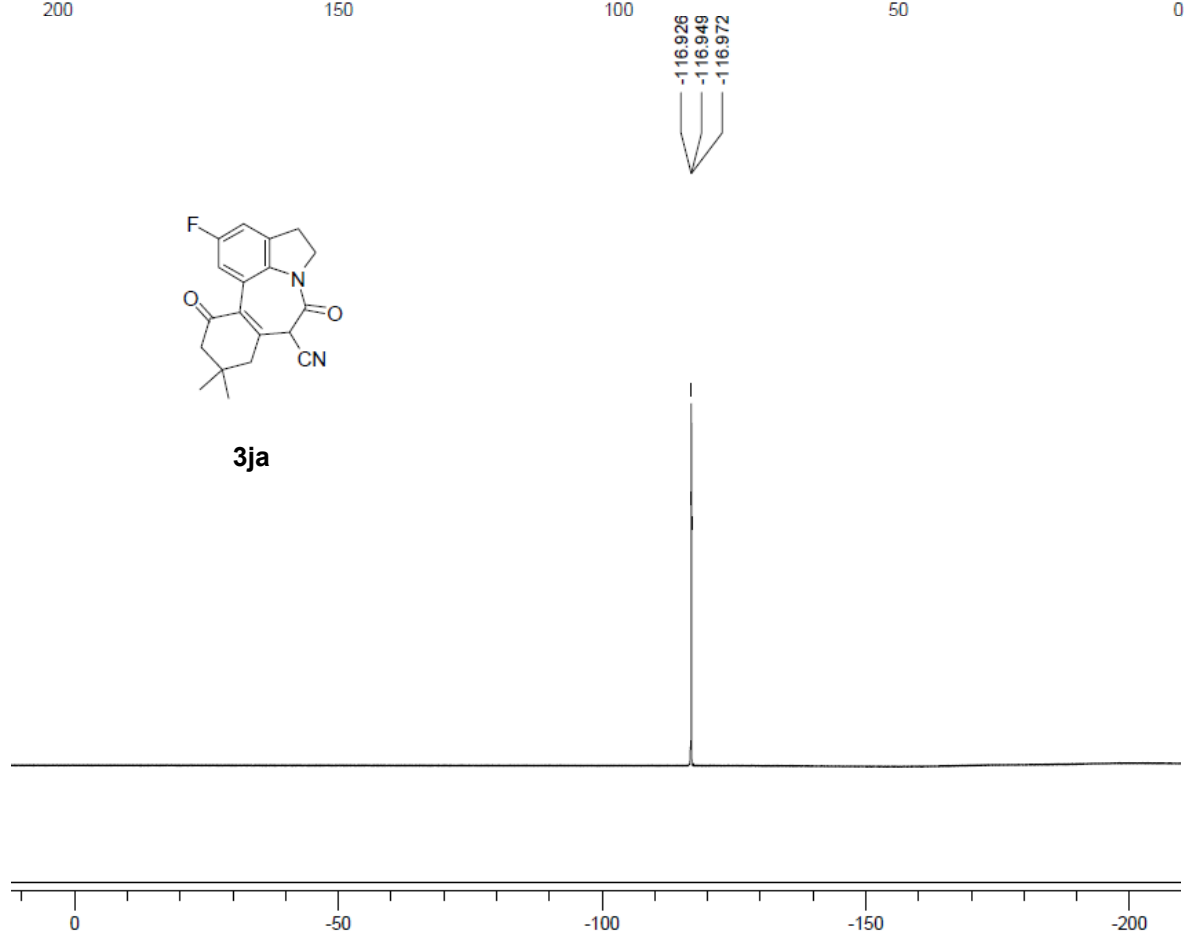

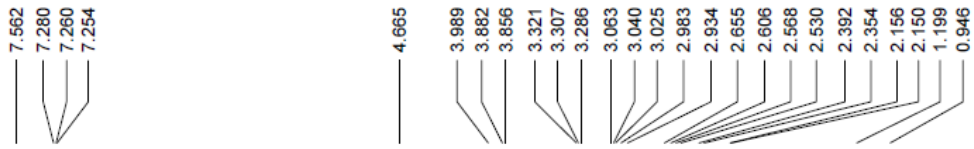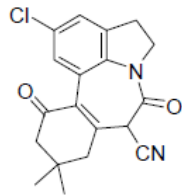

**3ka**

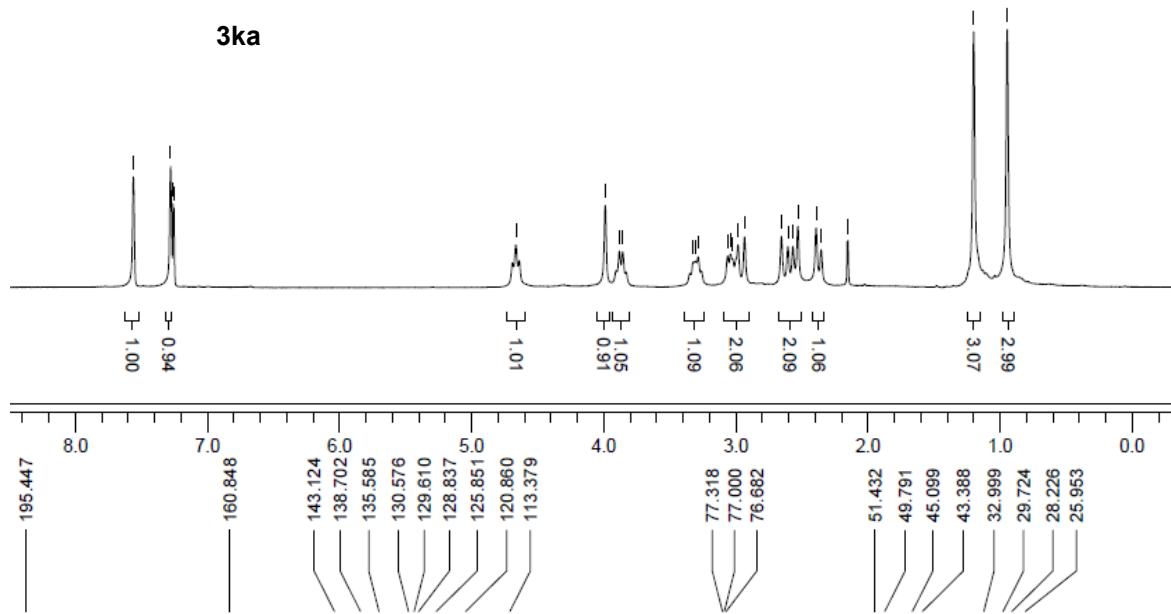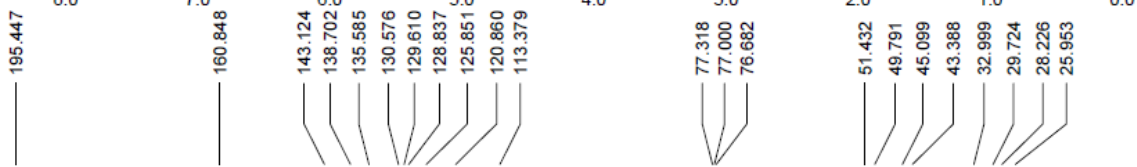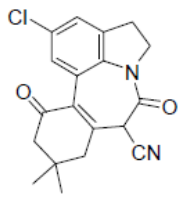

**3ka**

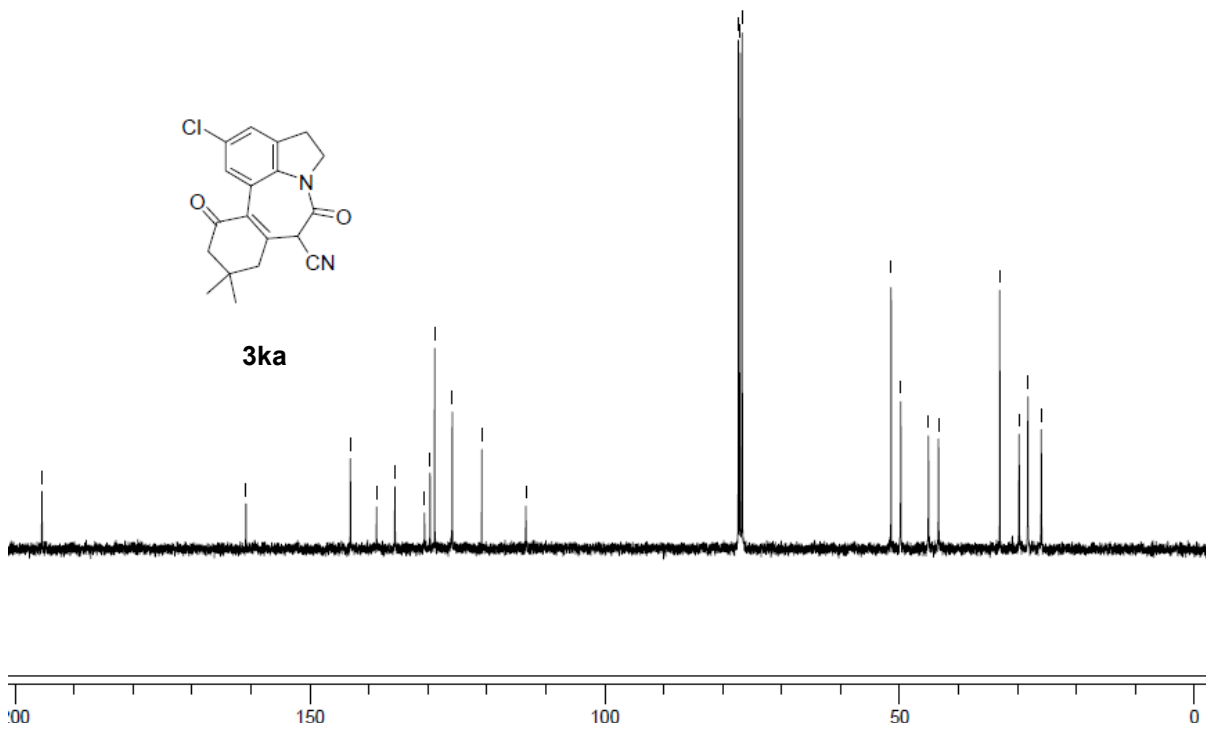

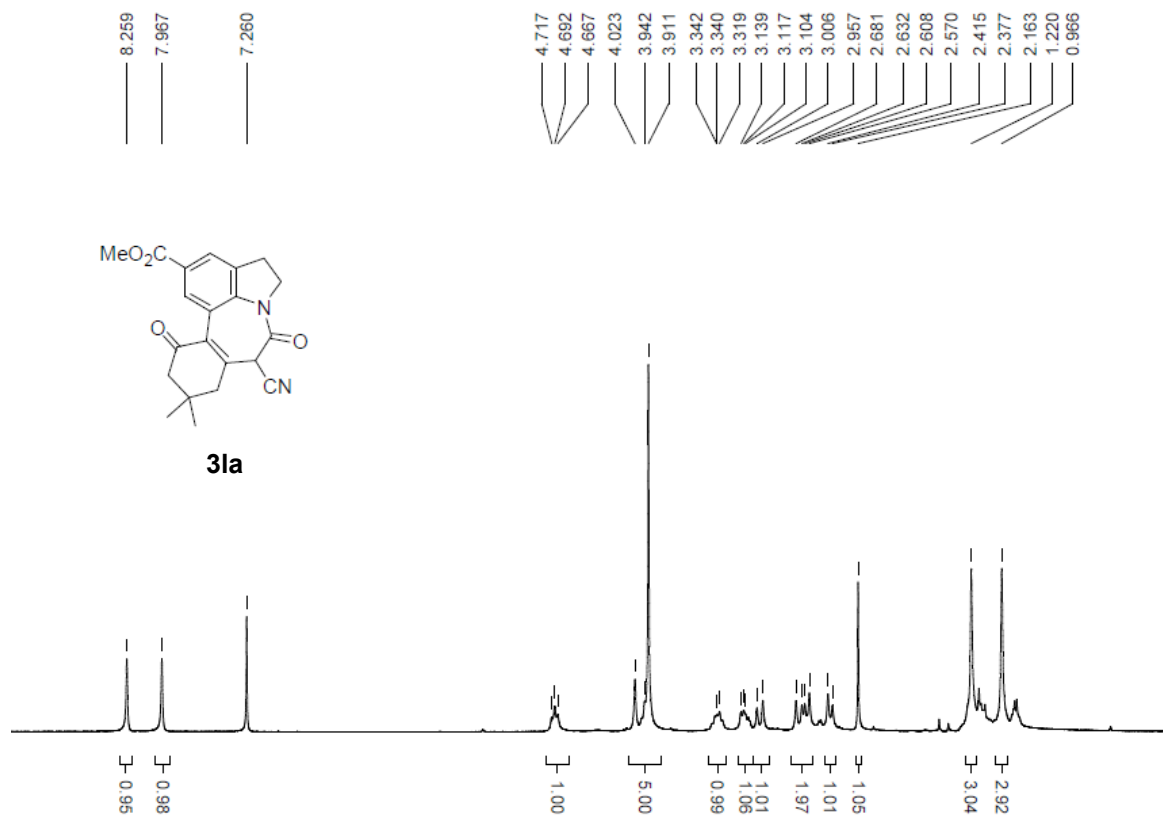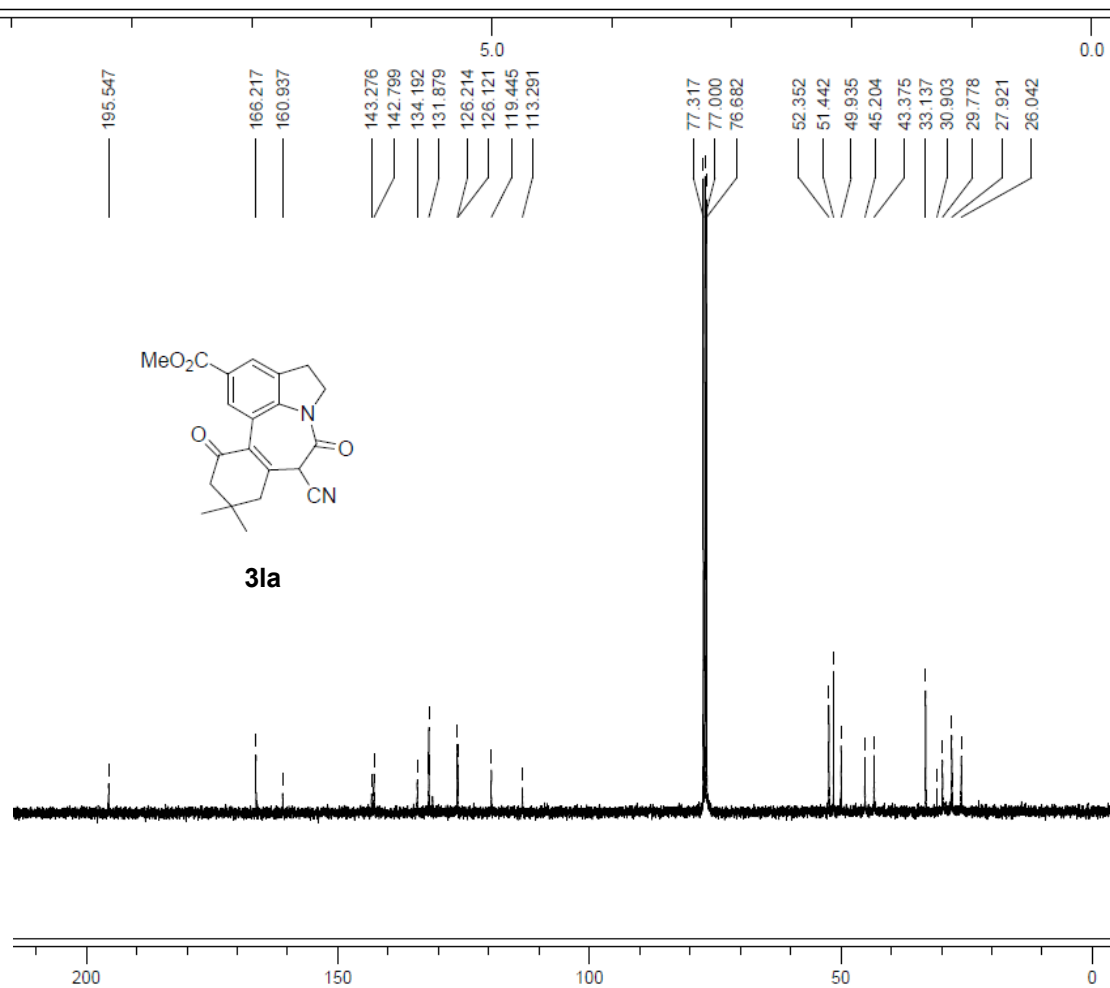

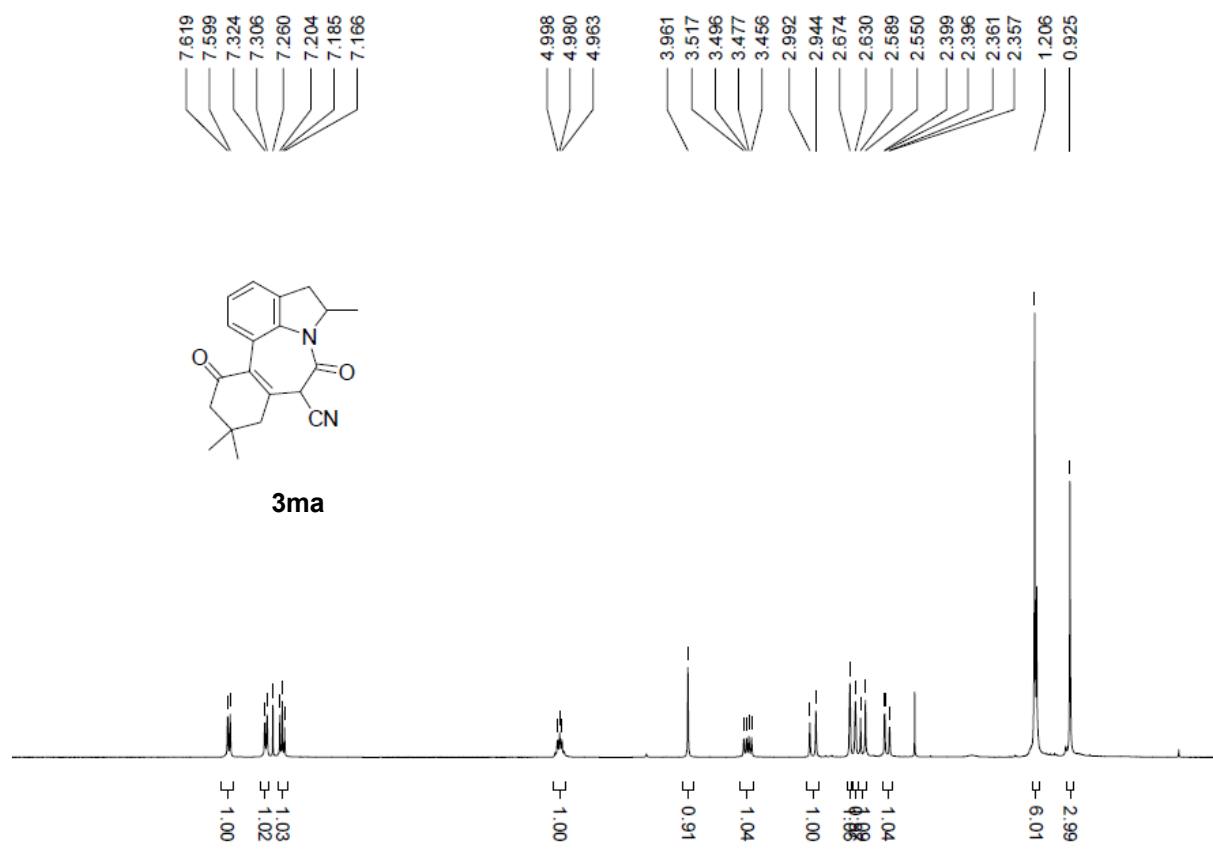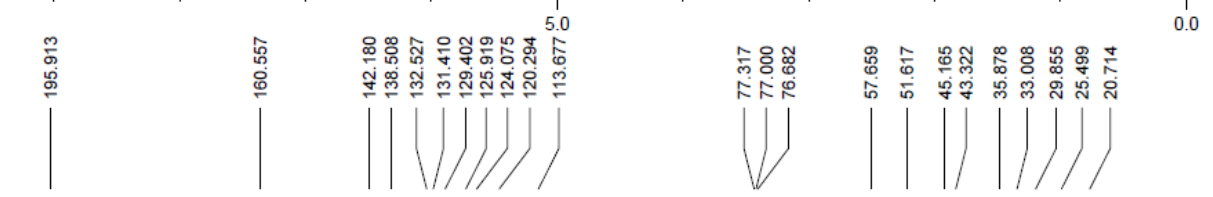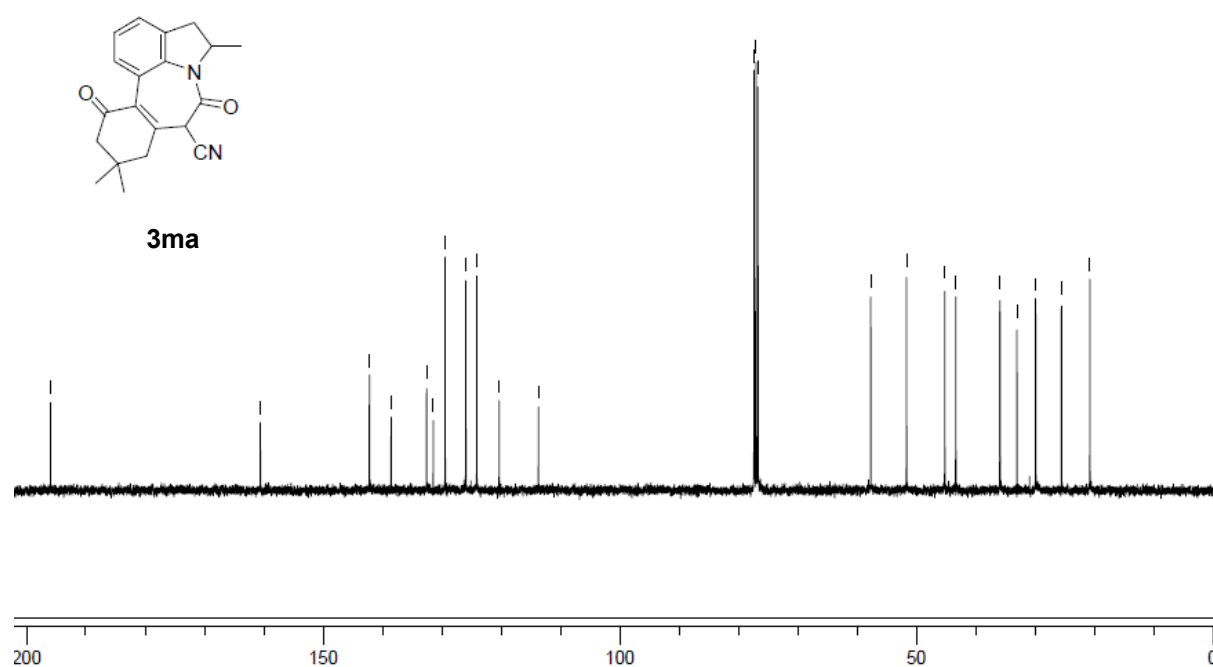



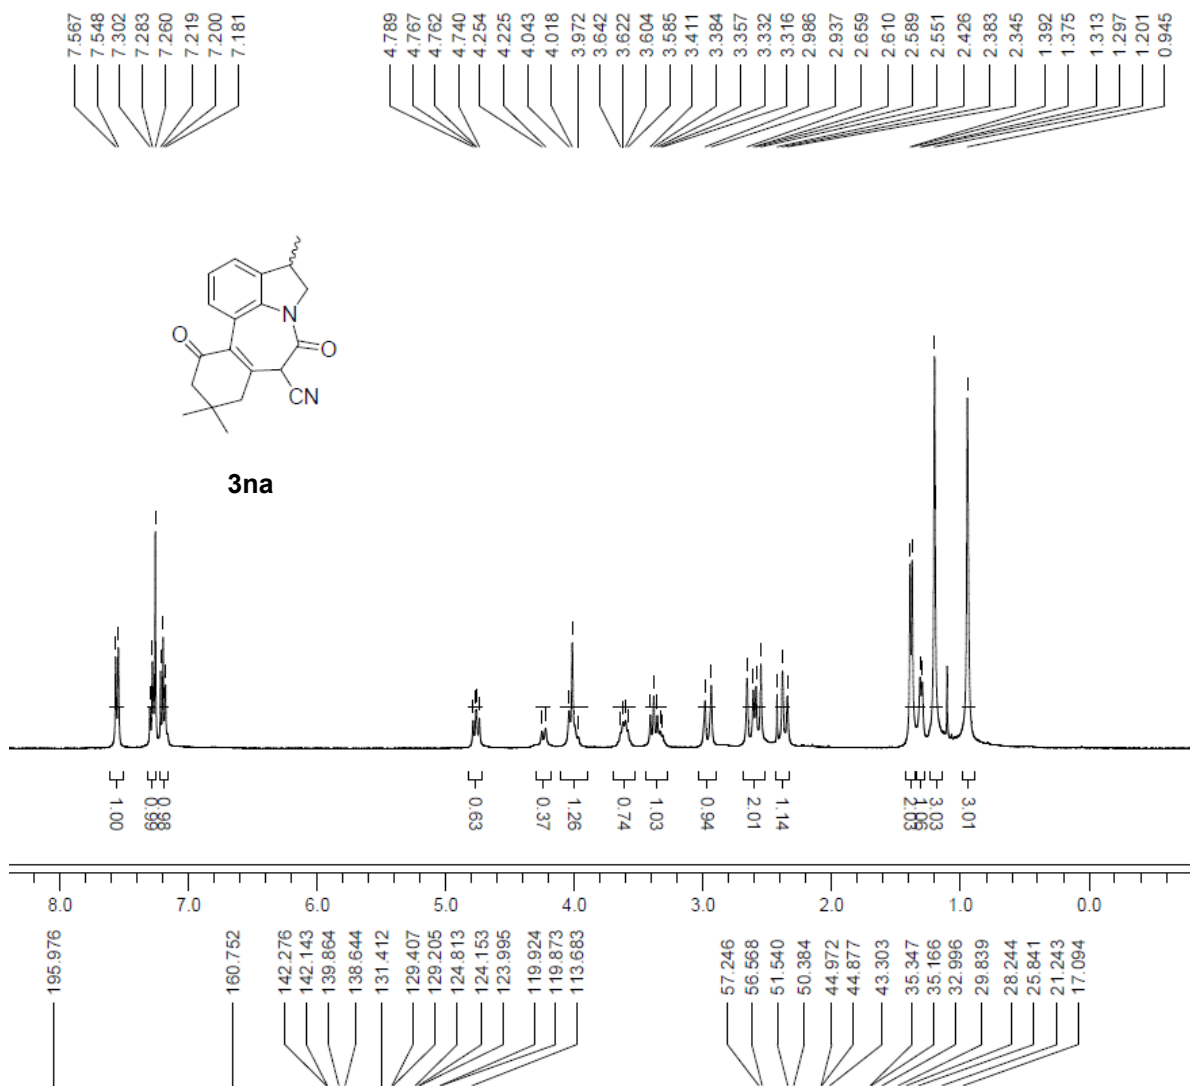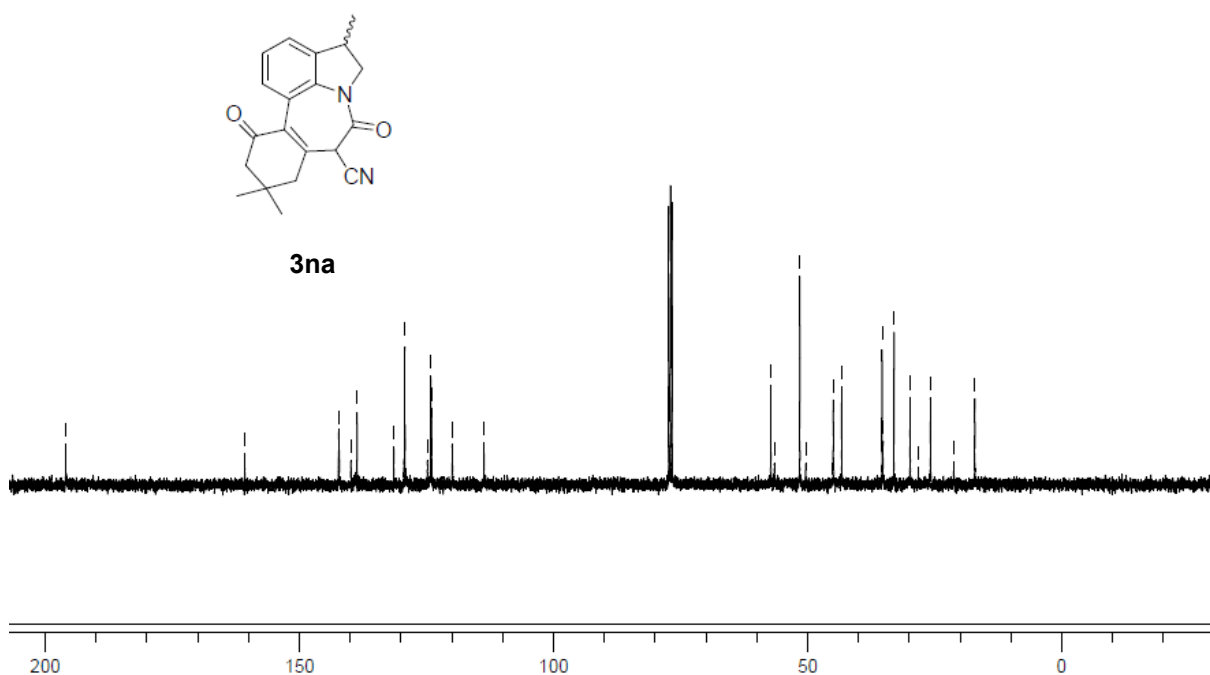

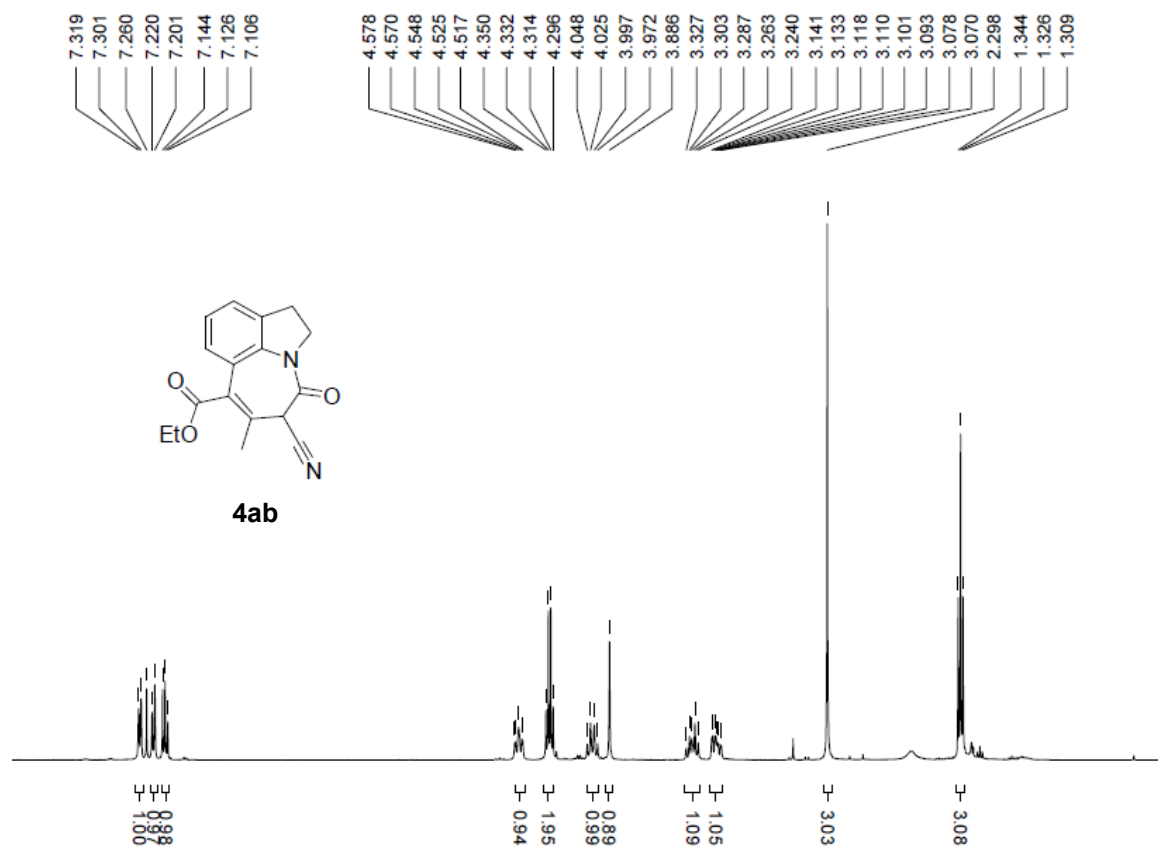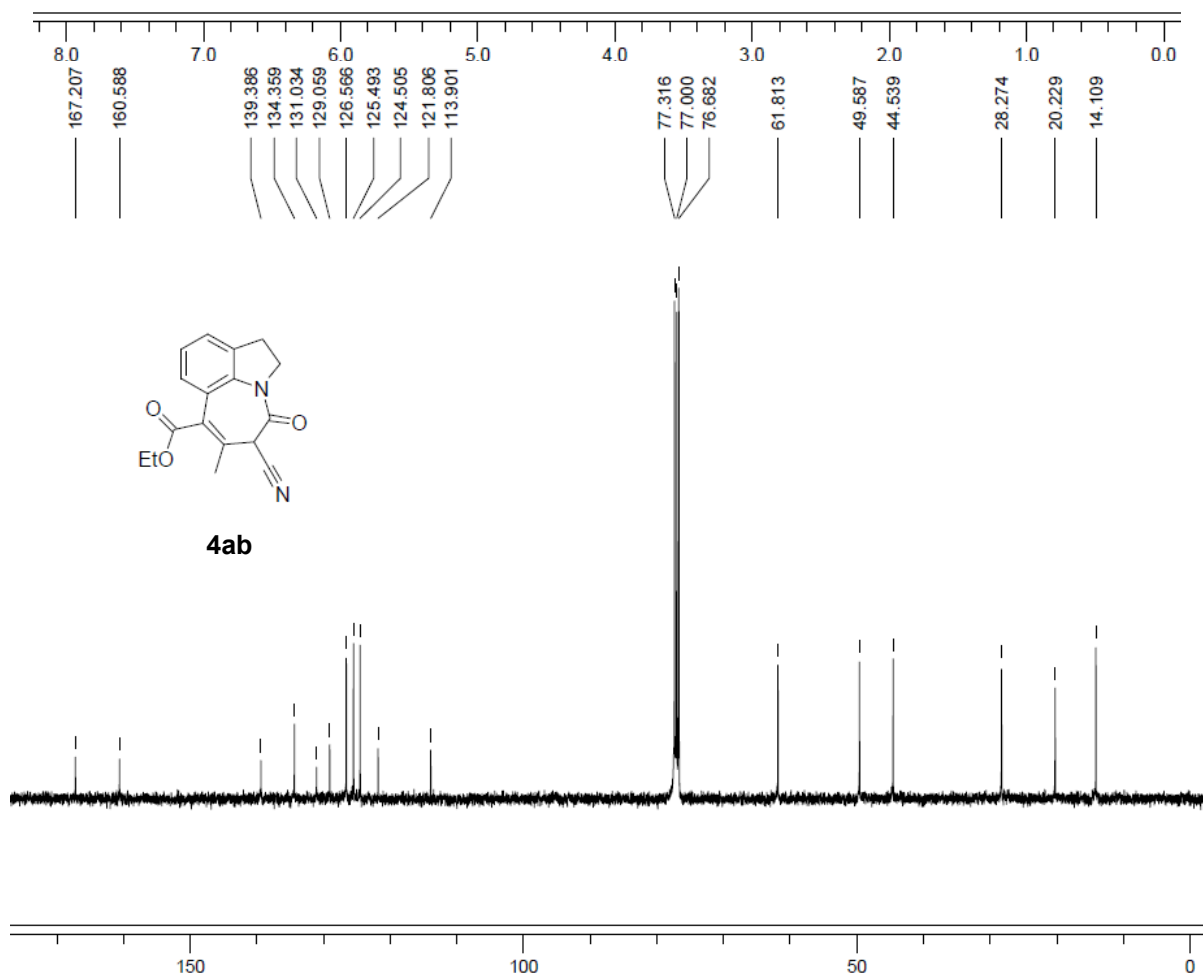

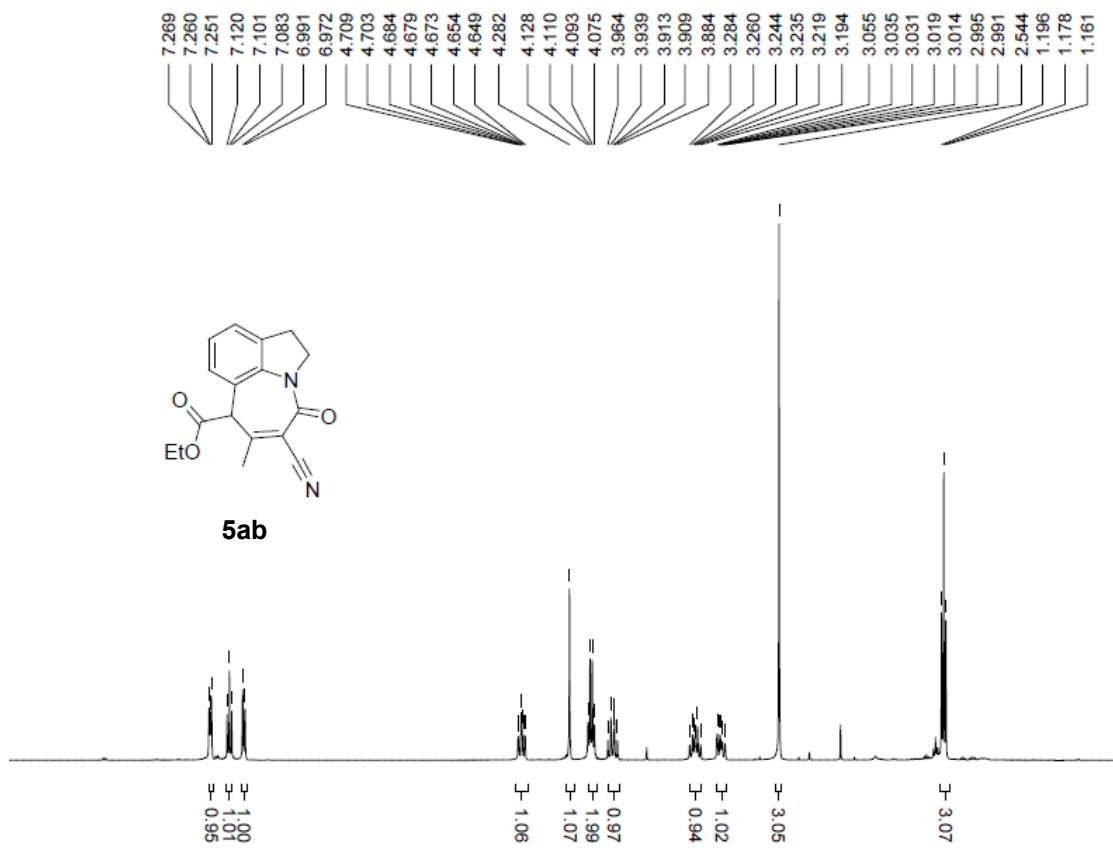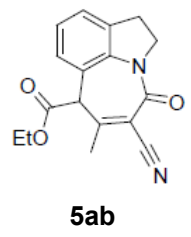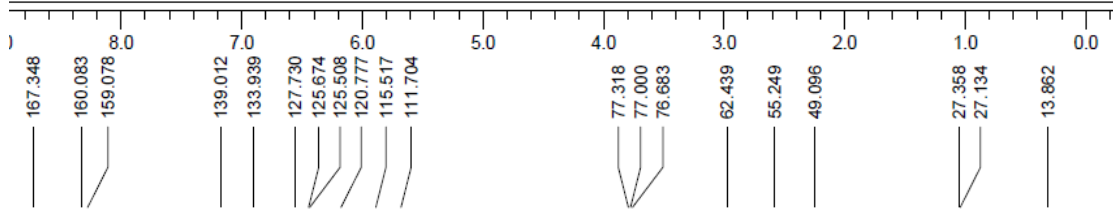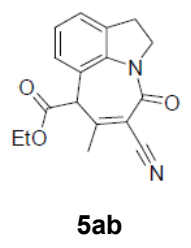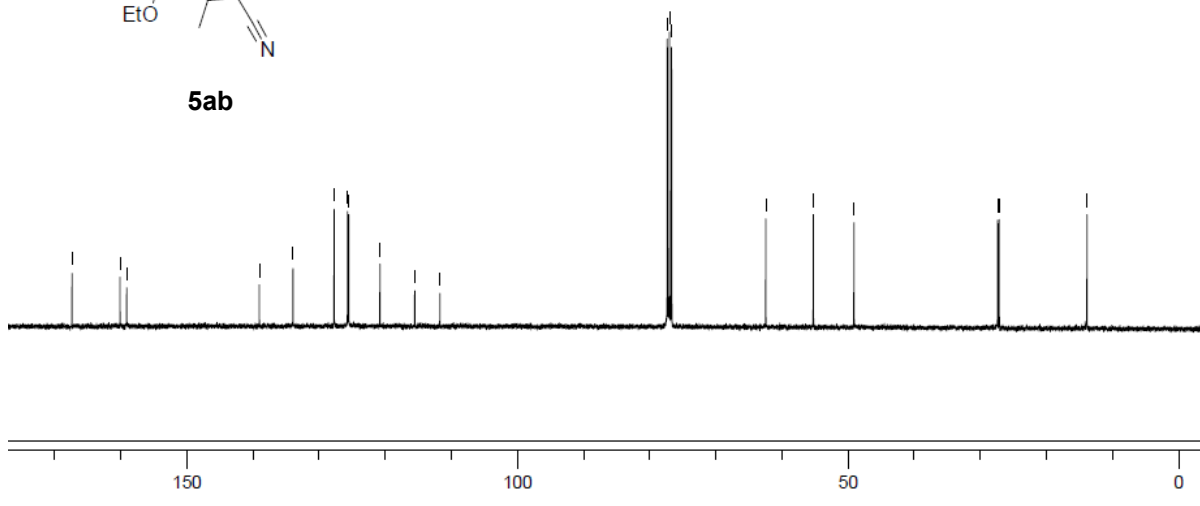

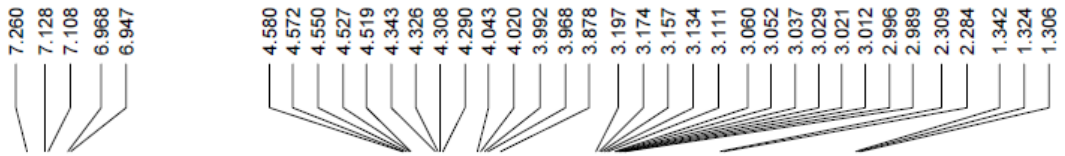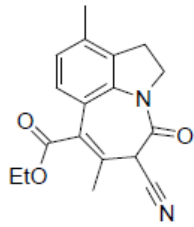

**4bb**

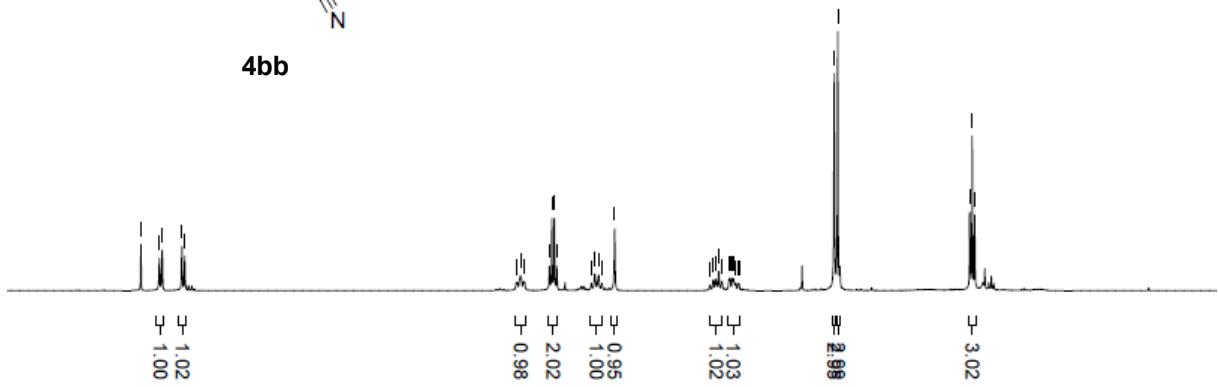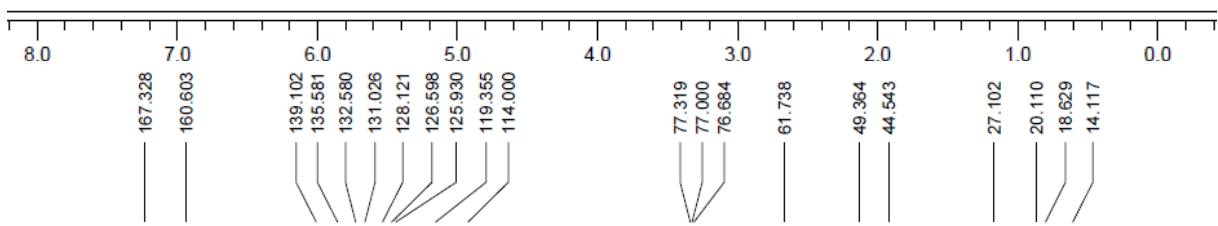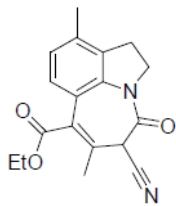

**4bb**

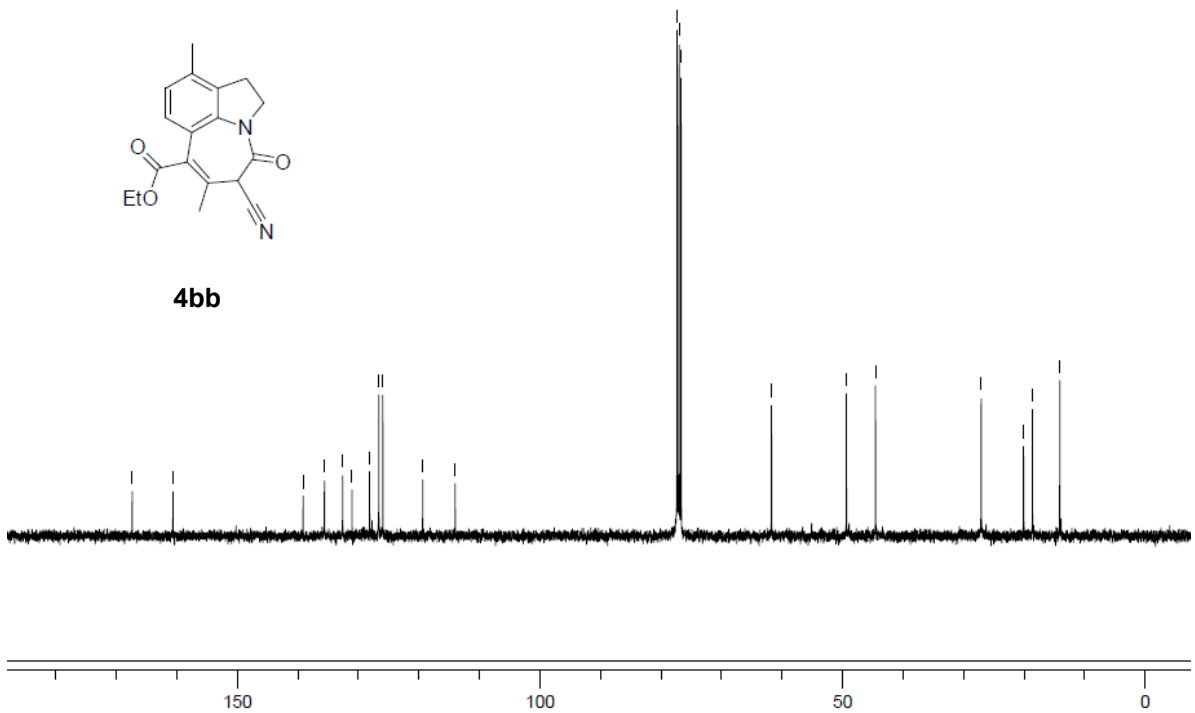

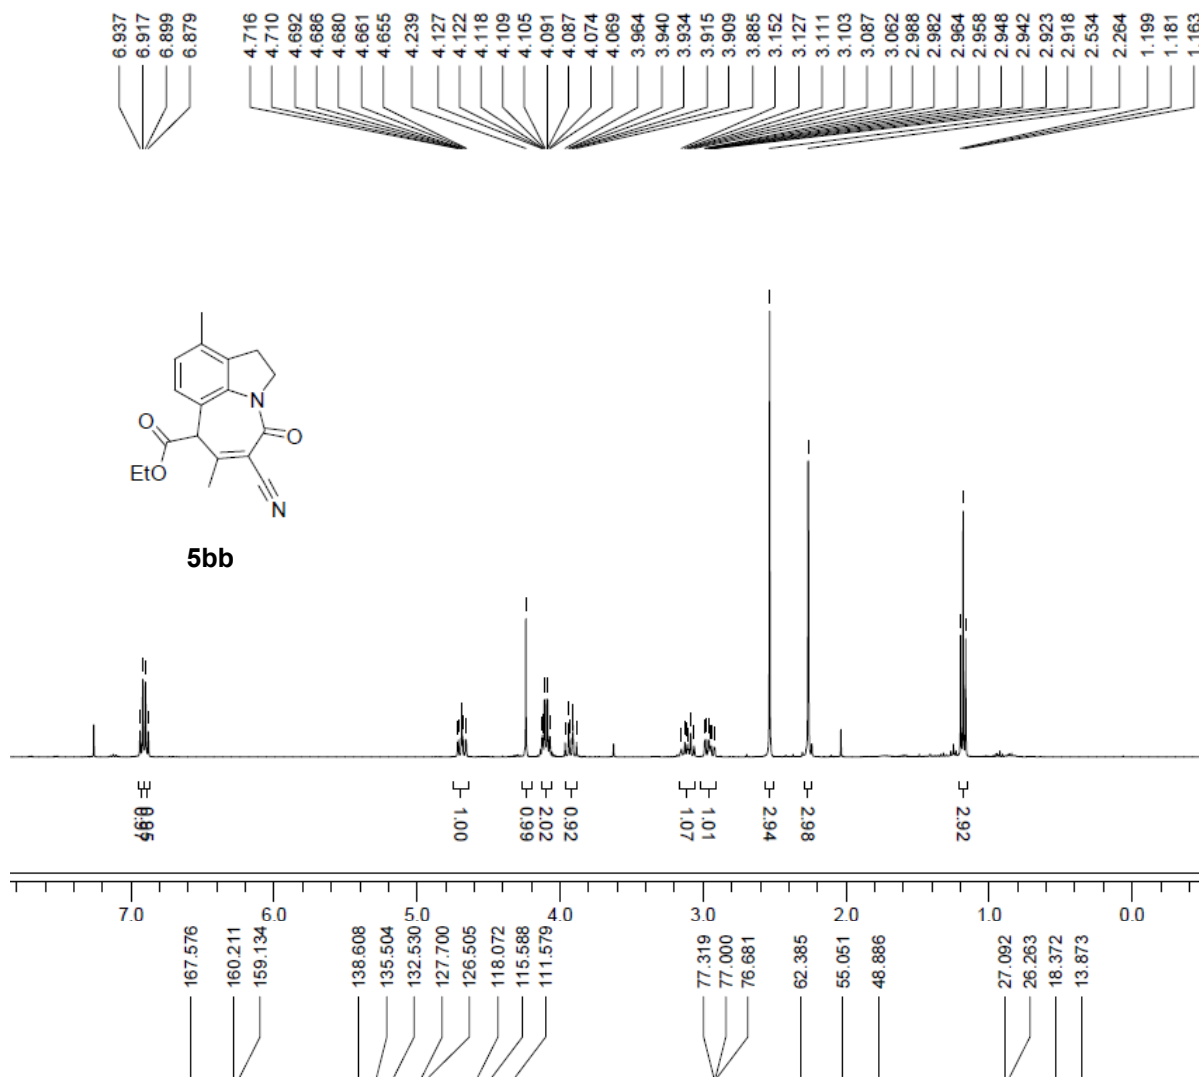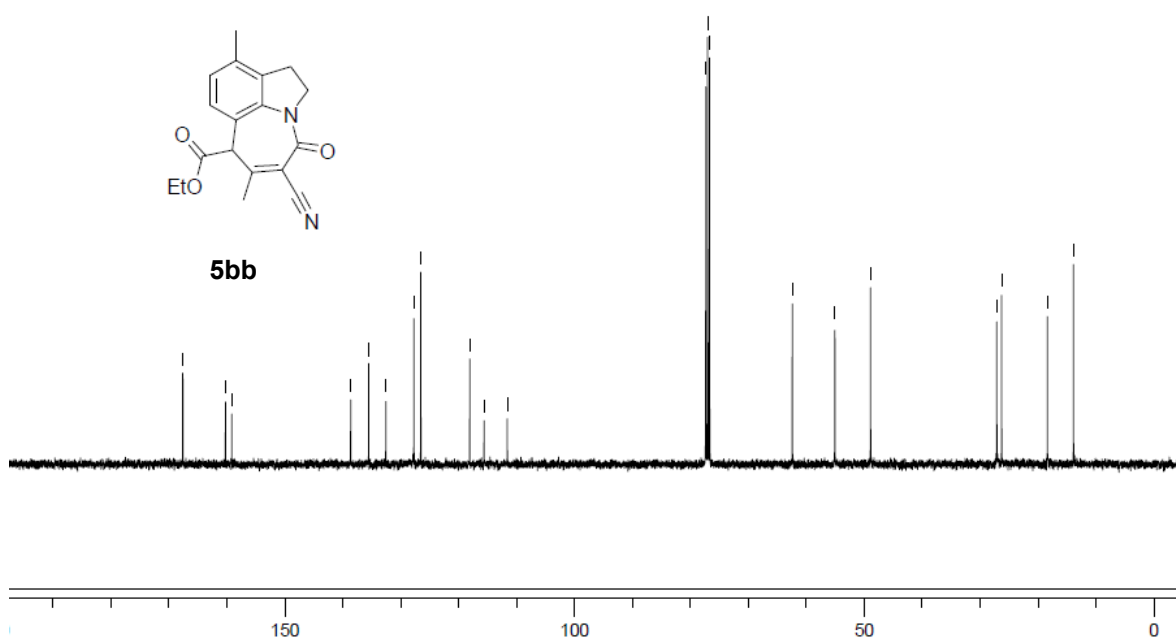

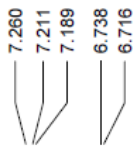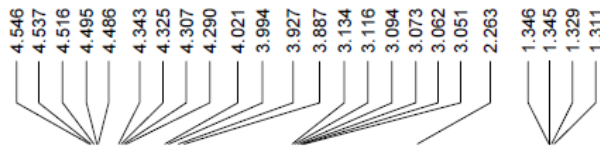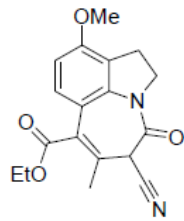

**4cb**

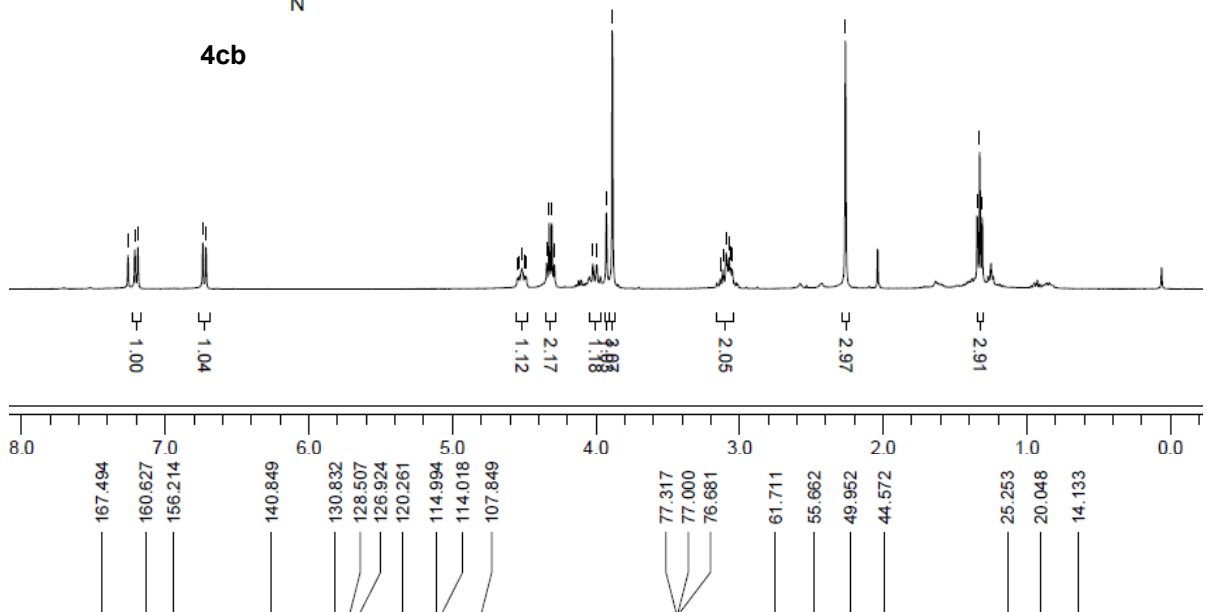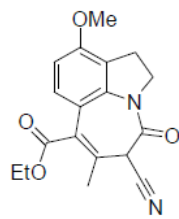

**4cb**

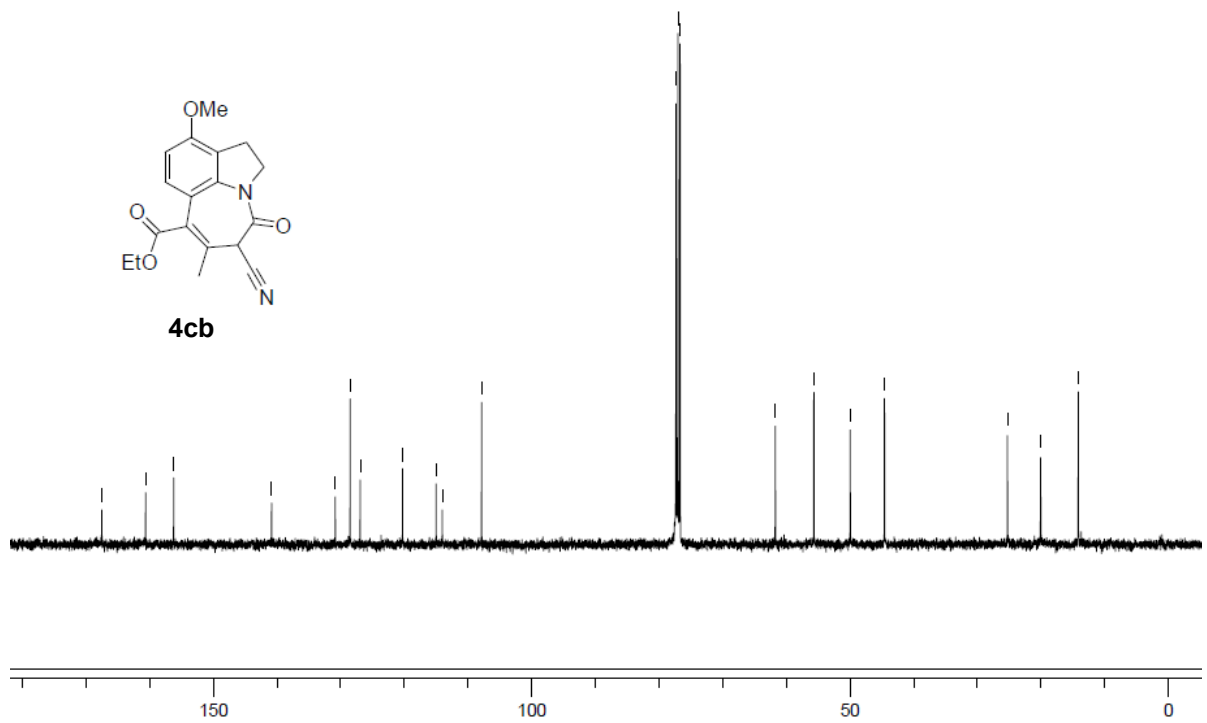

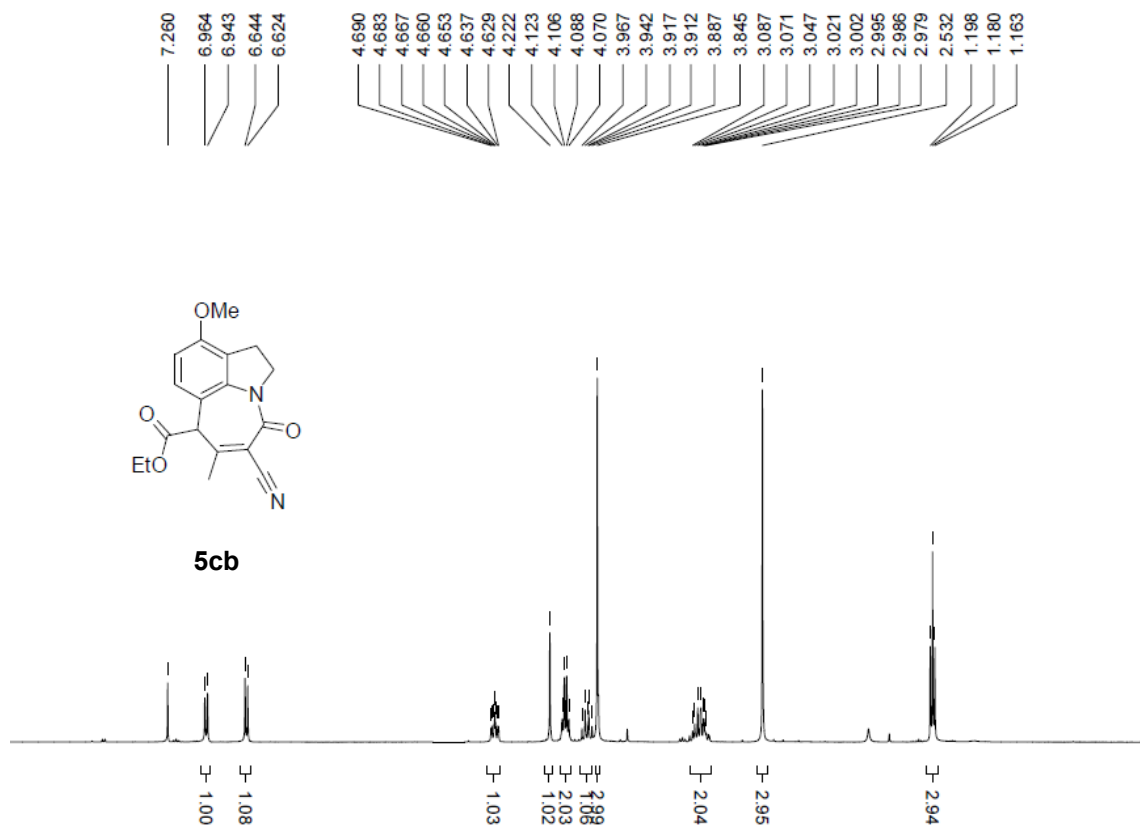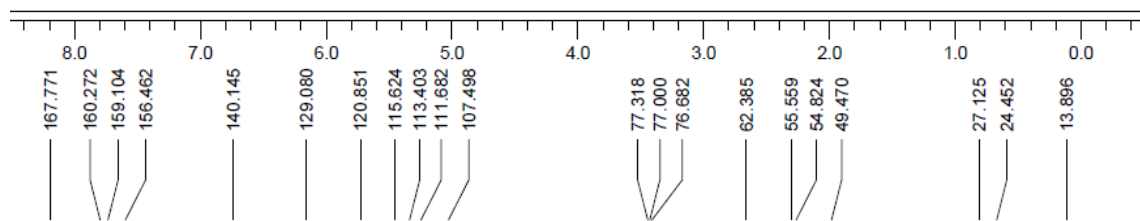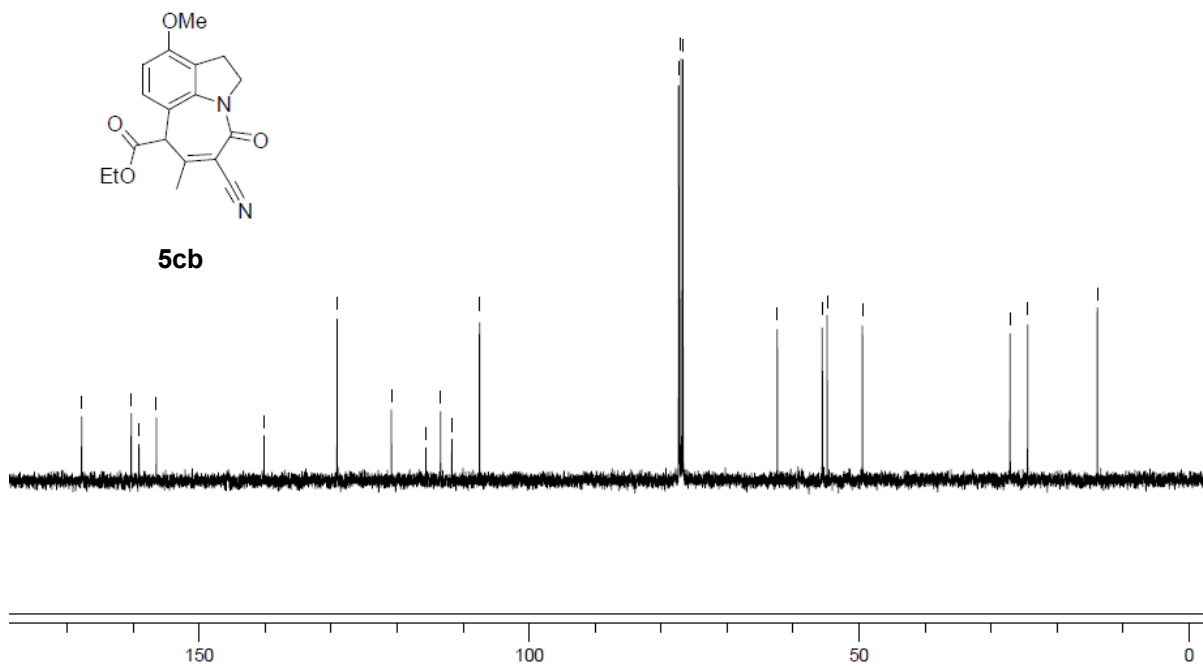

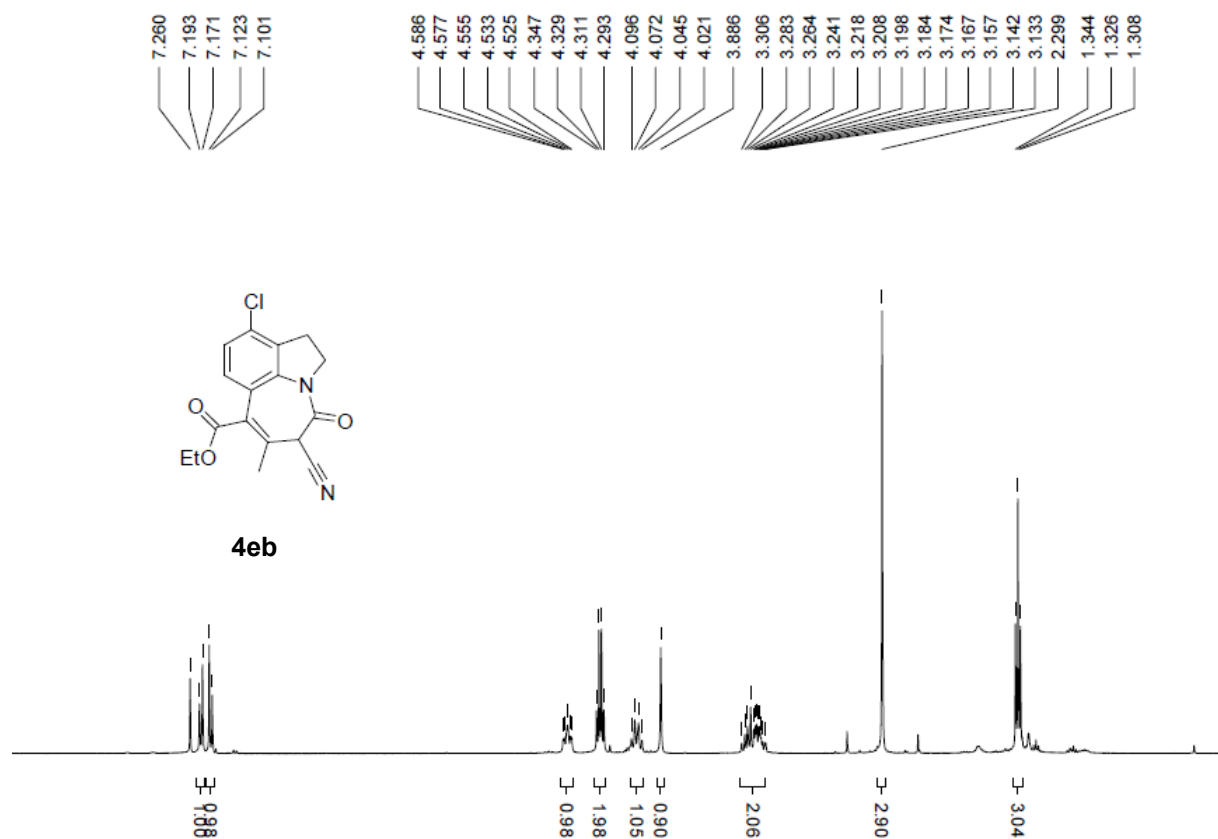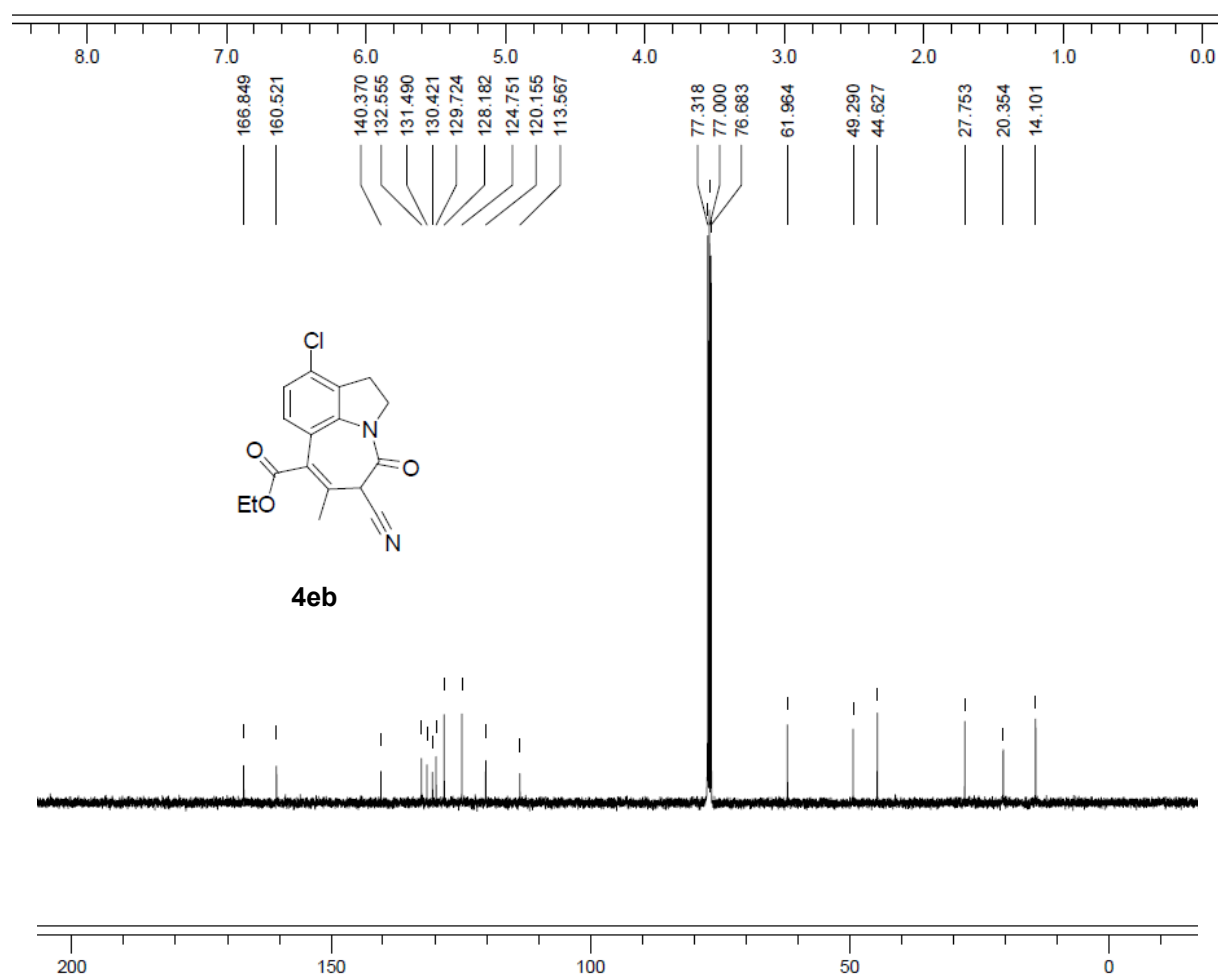



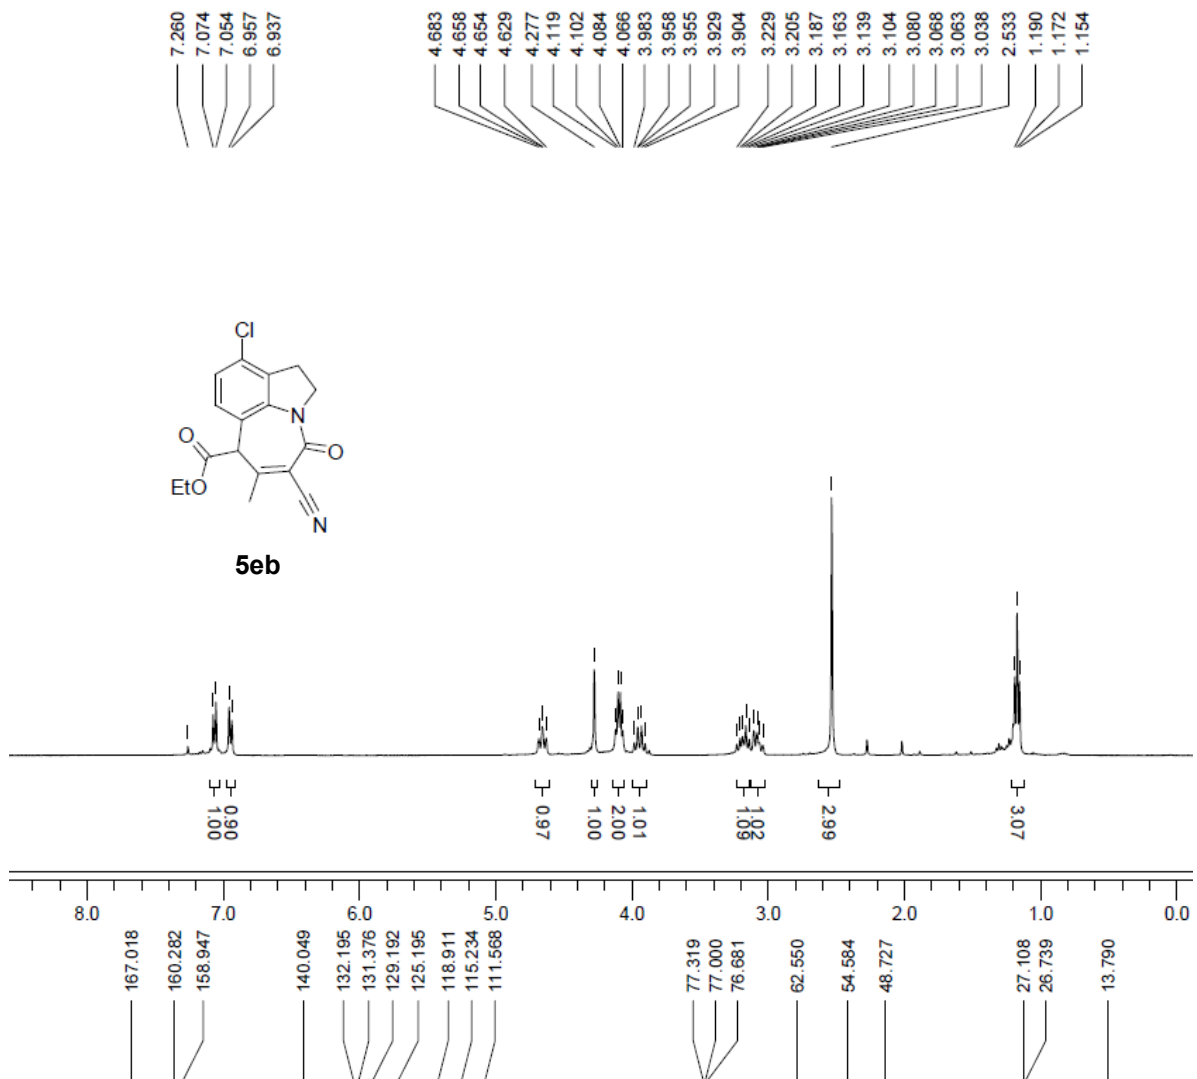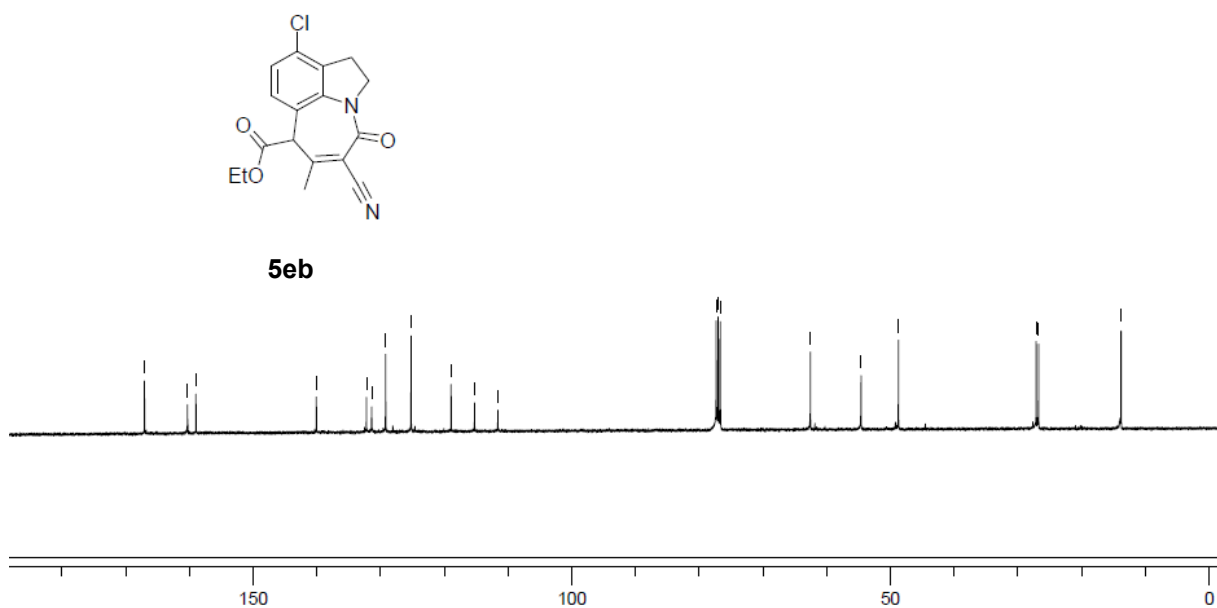

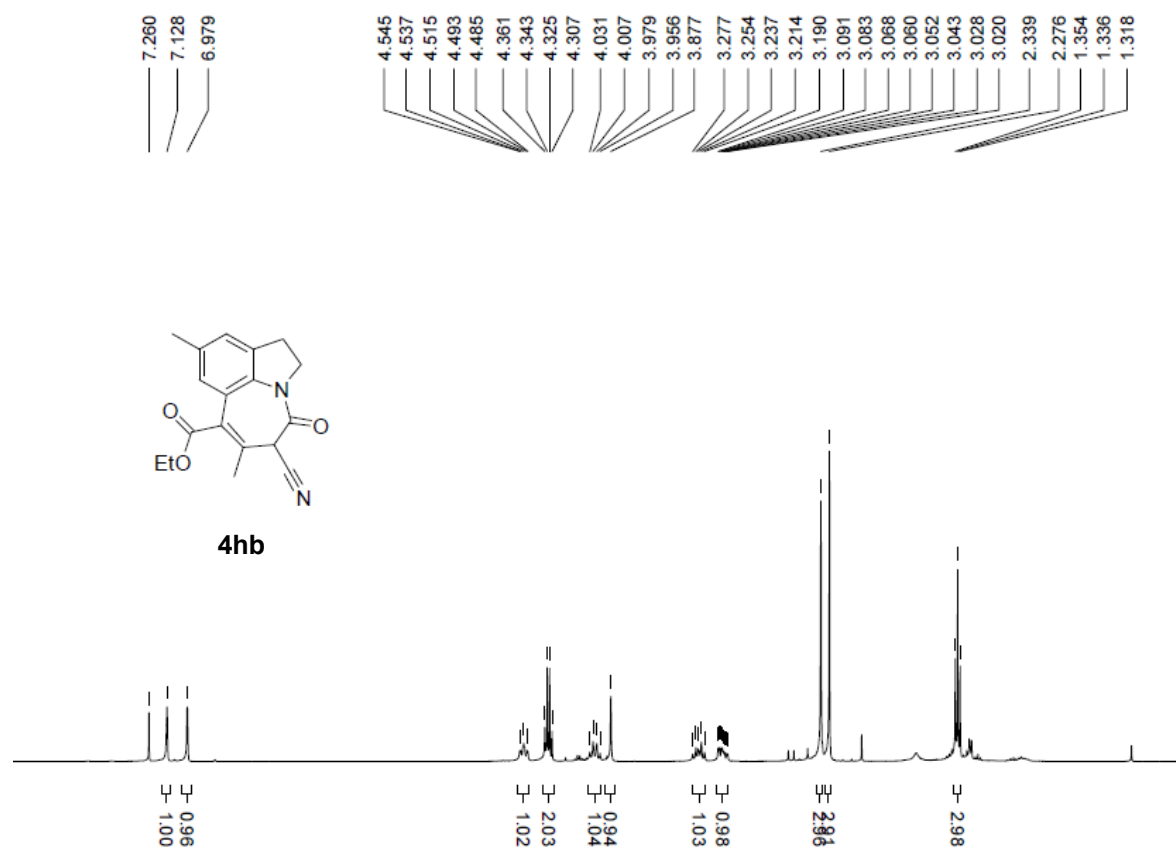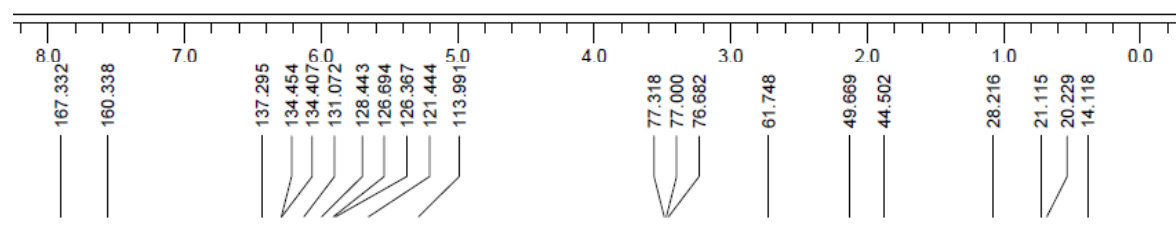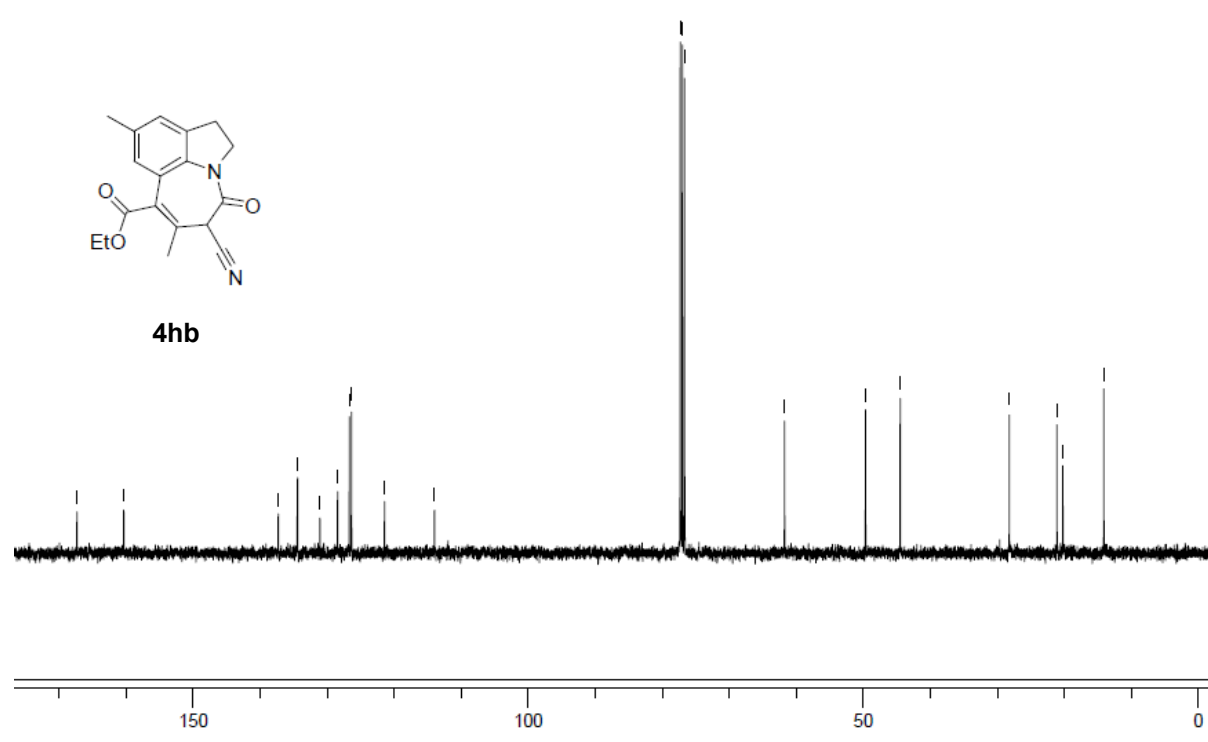

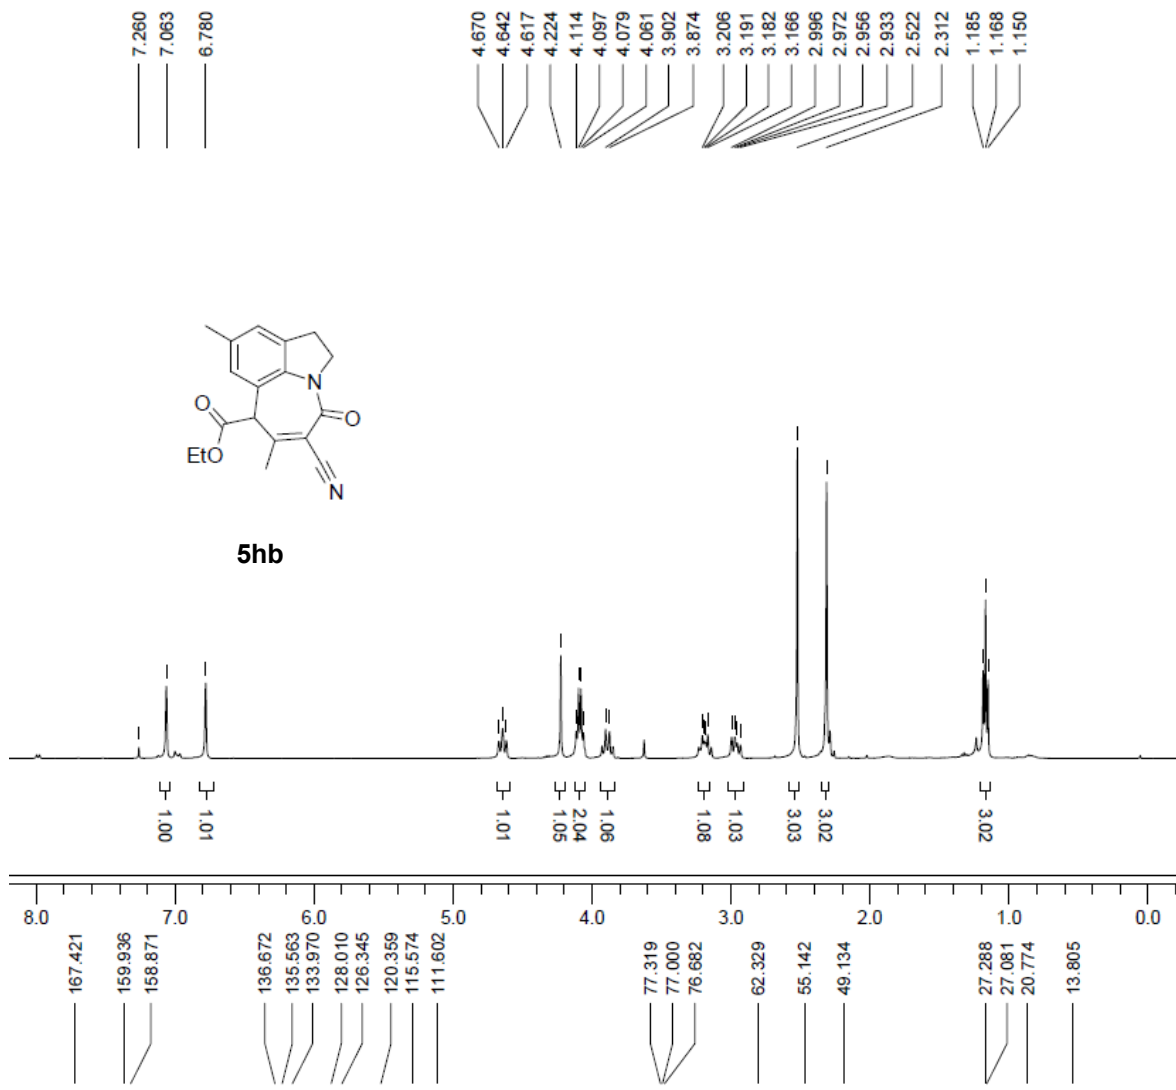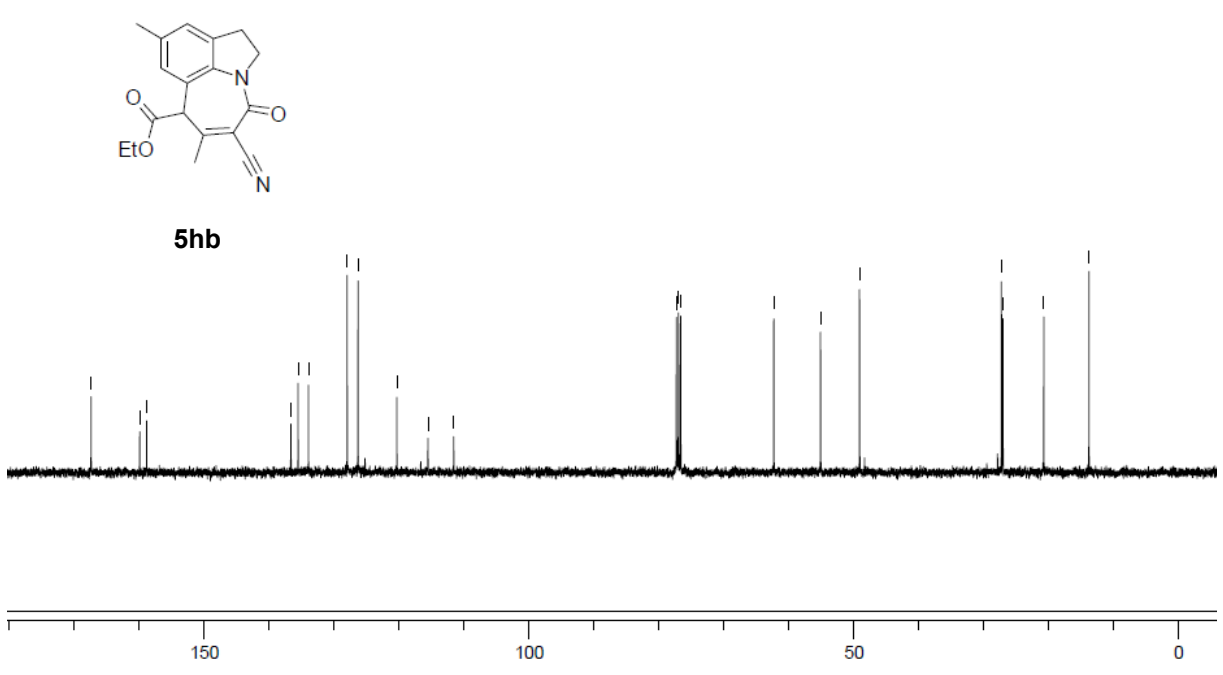

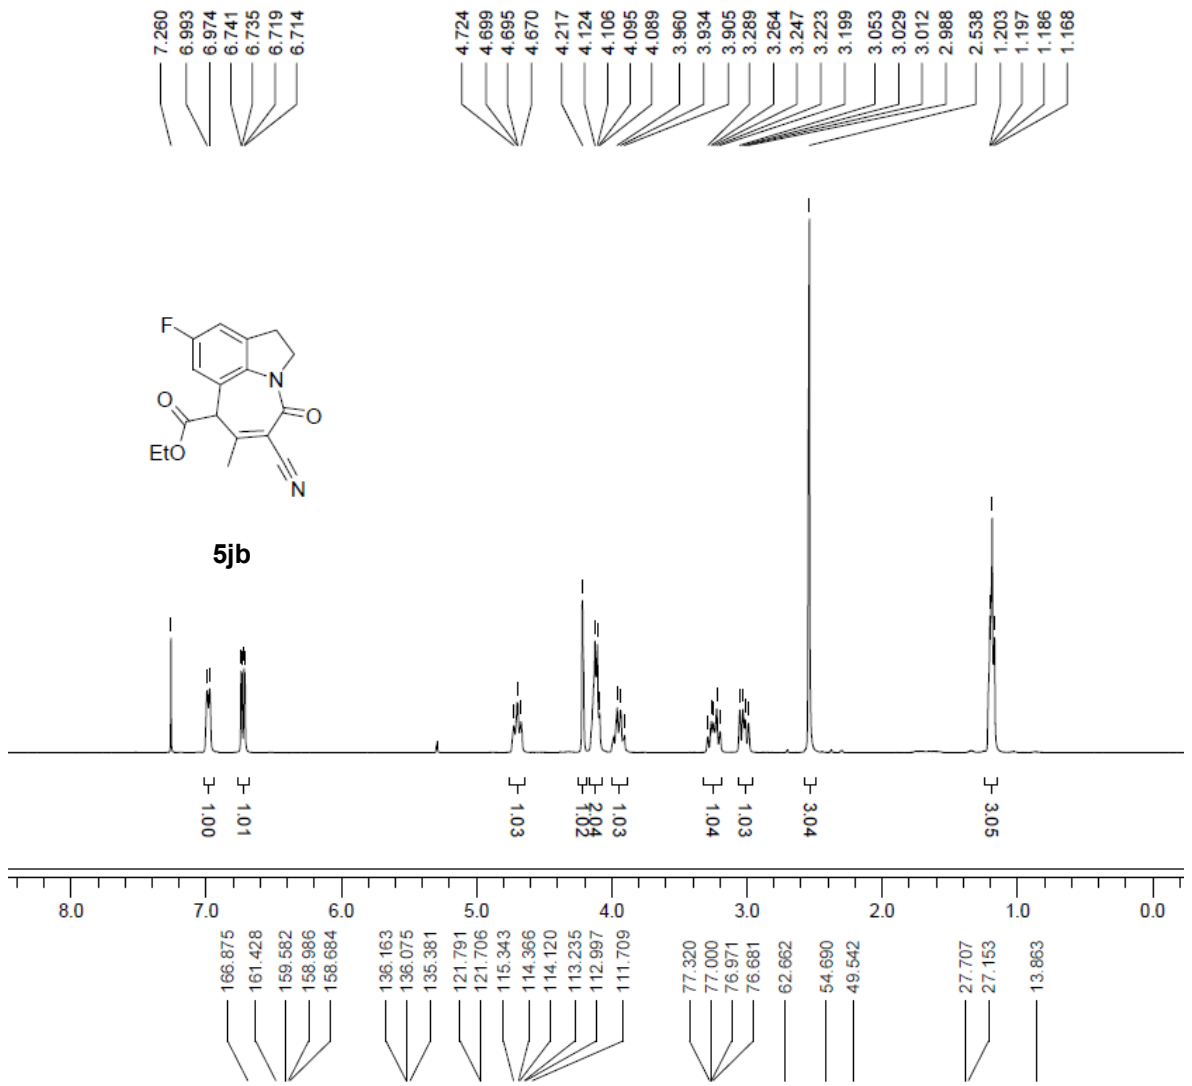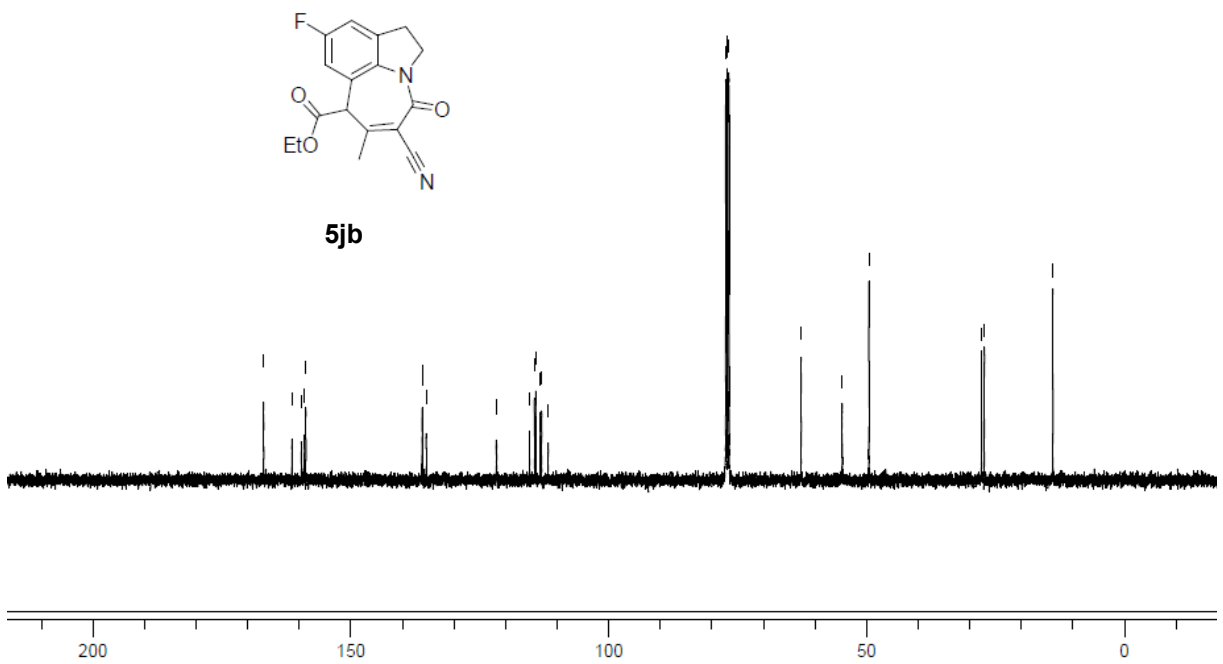

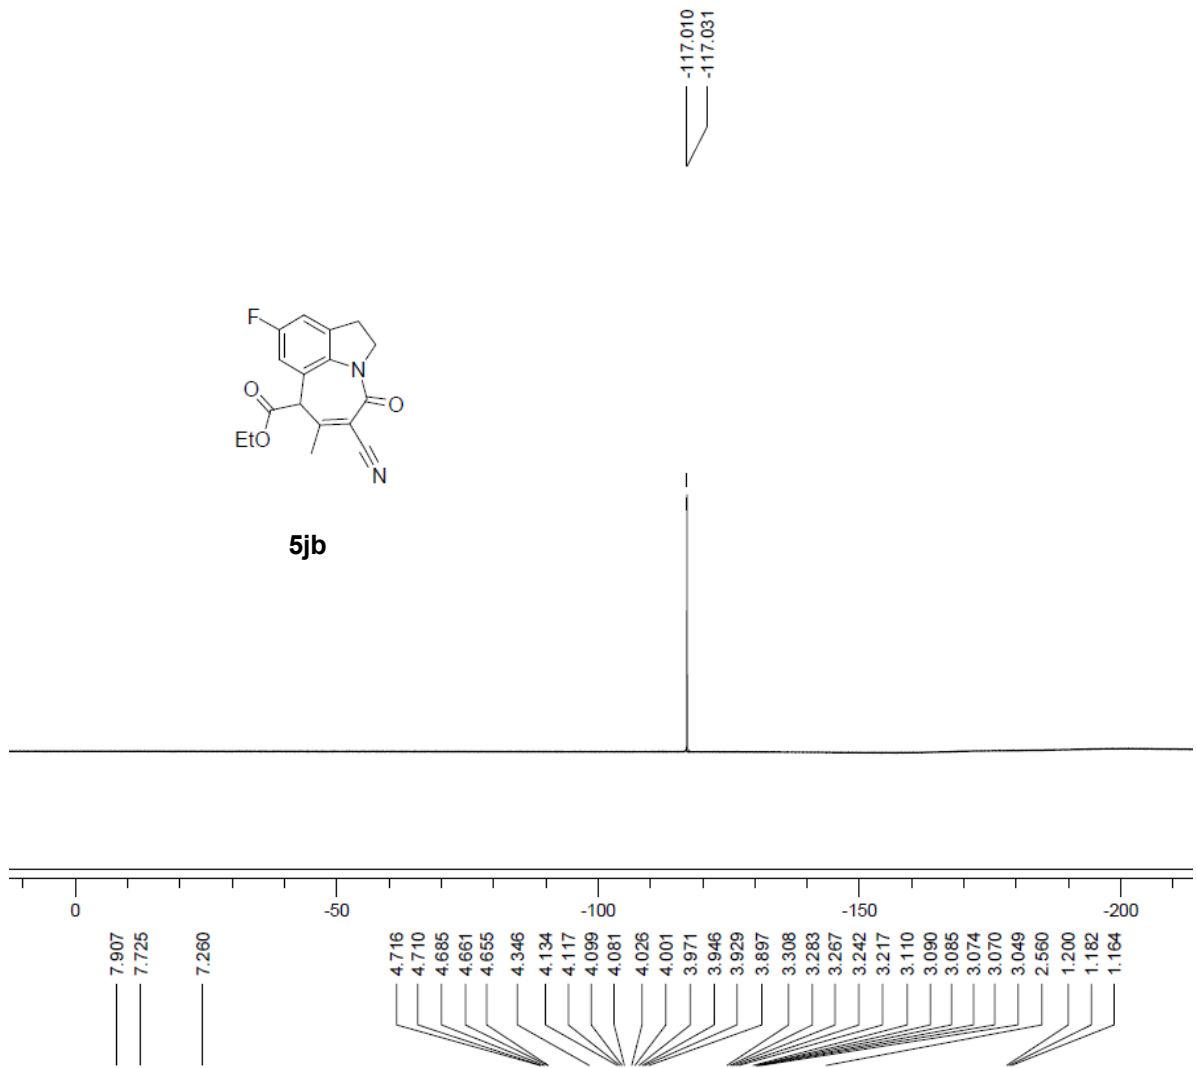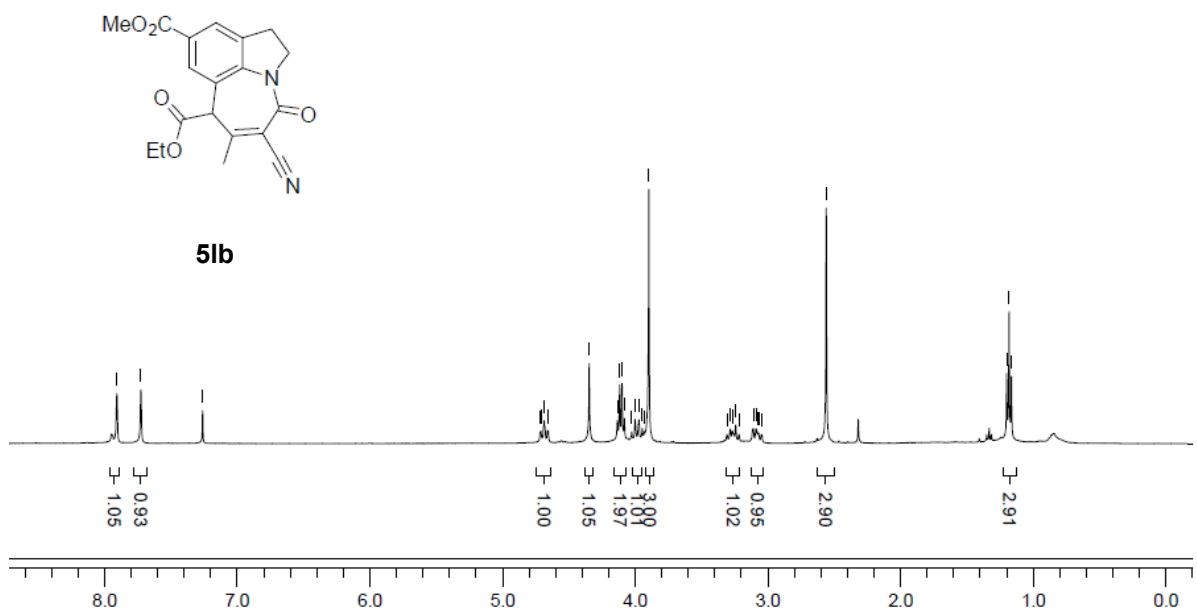

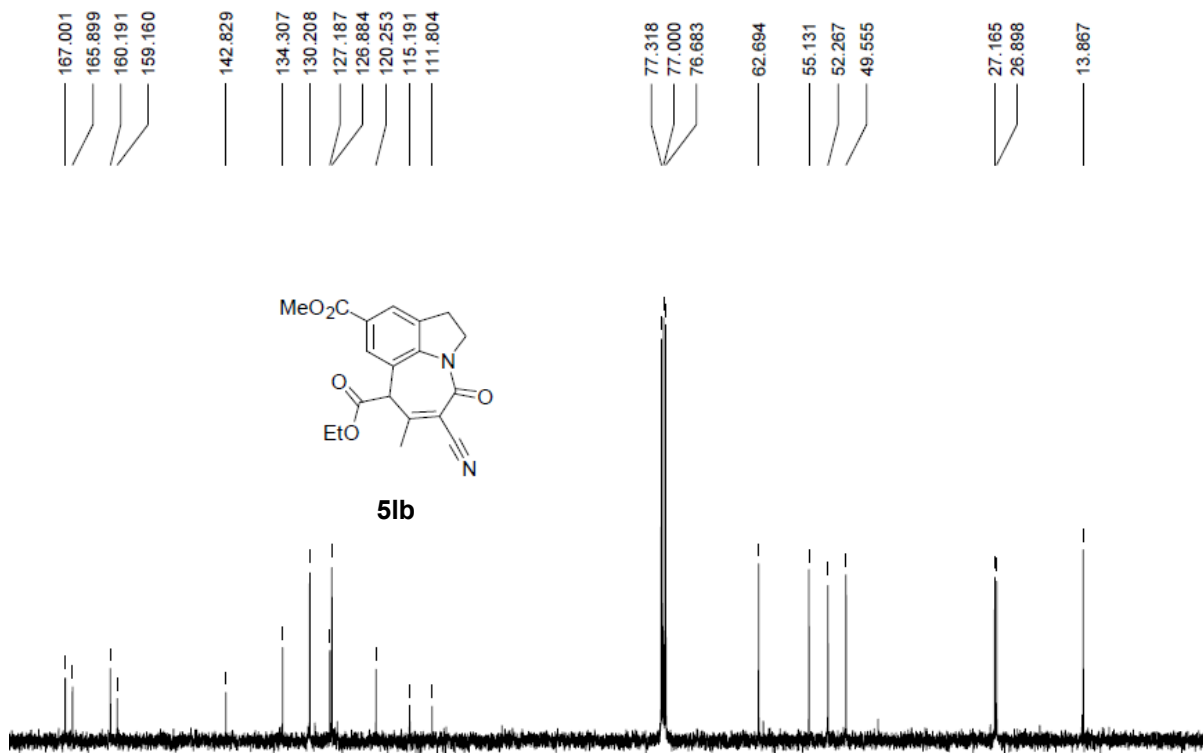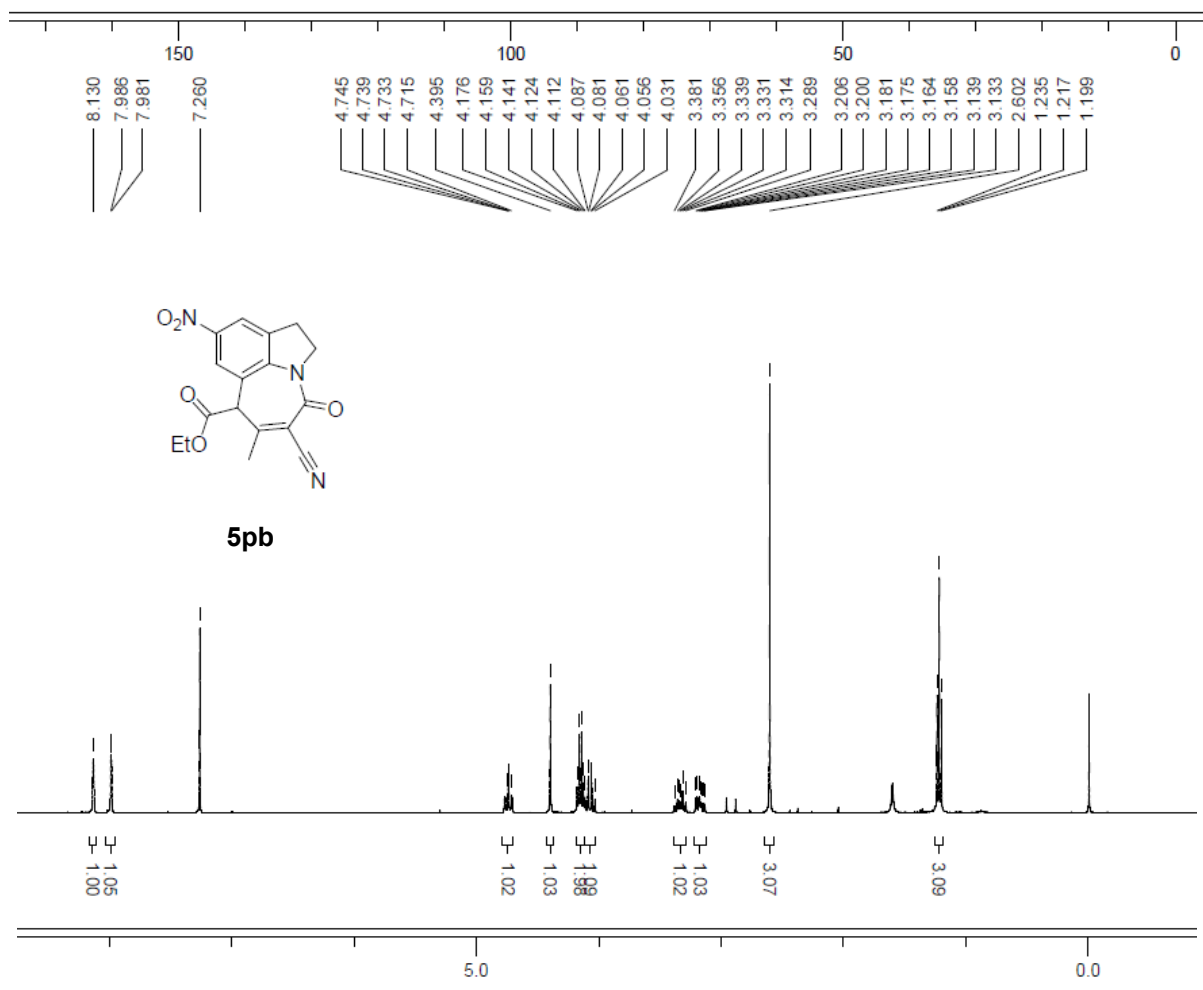

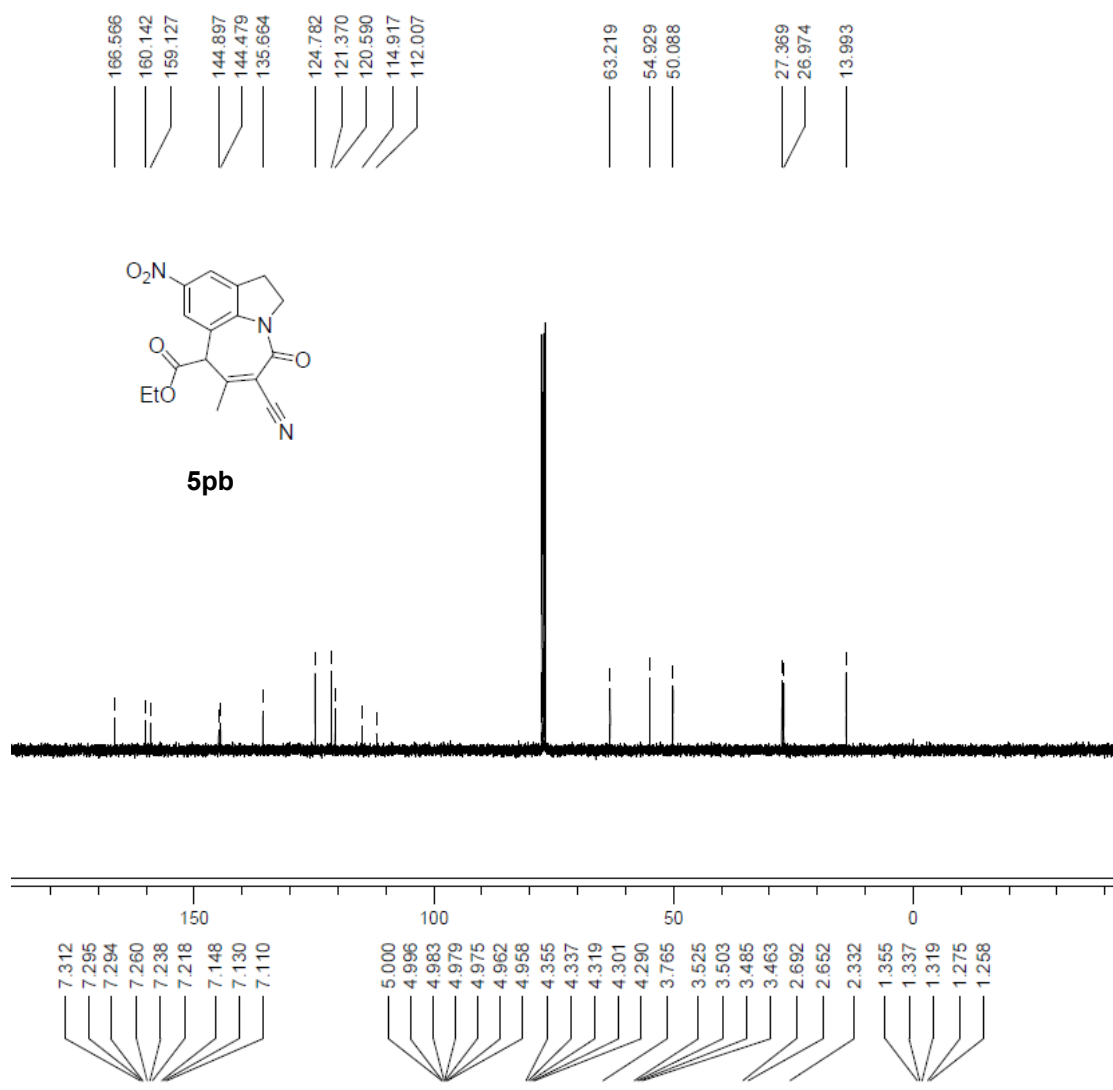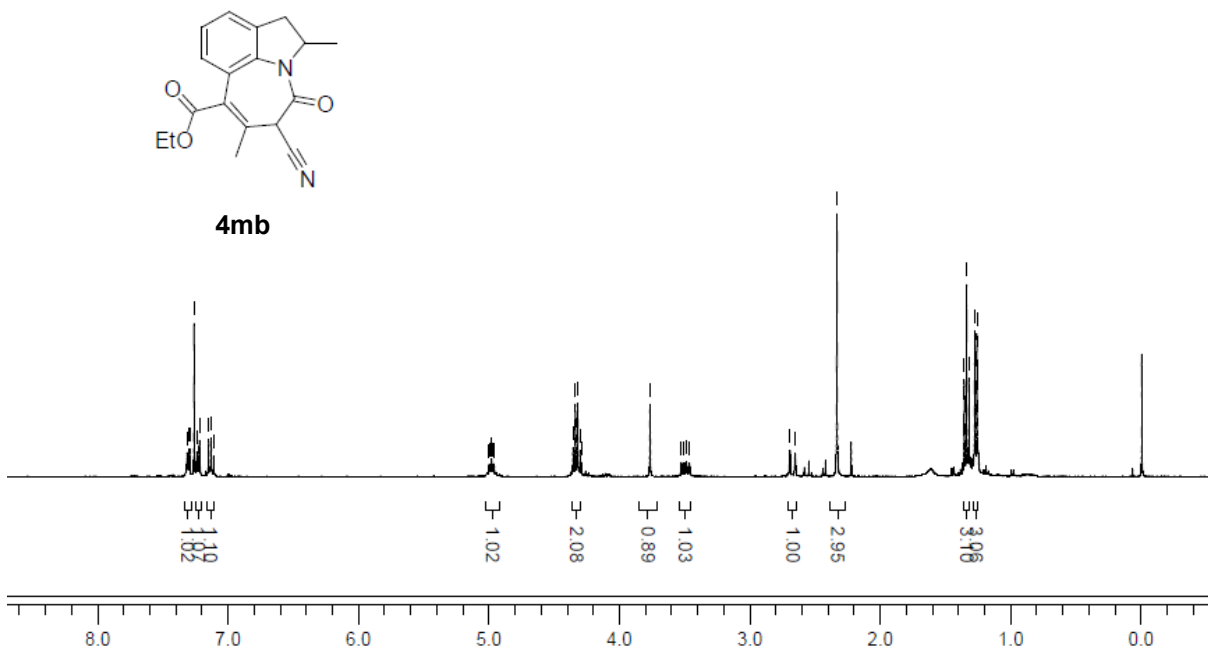

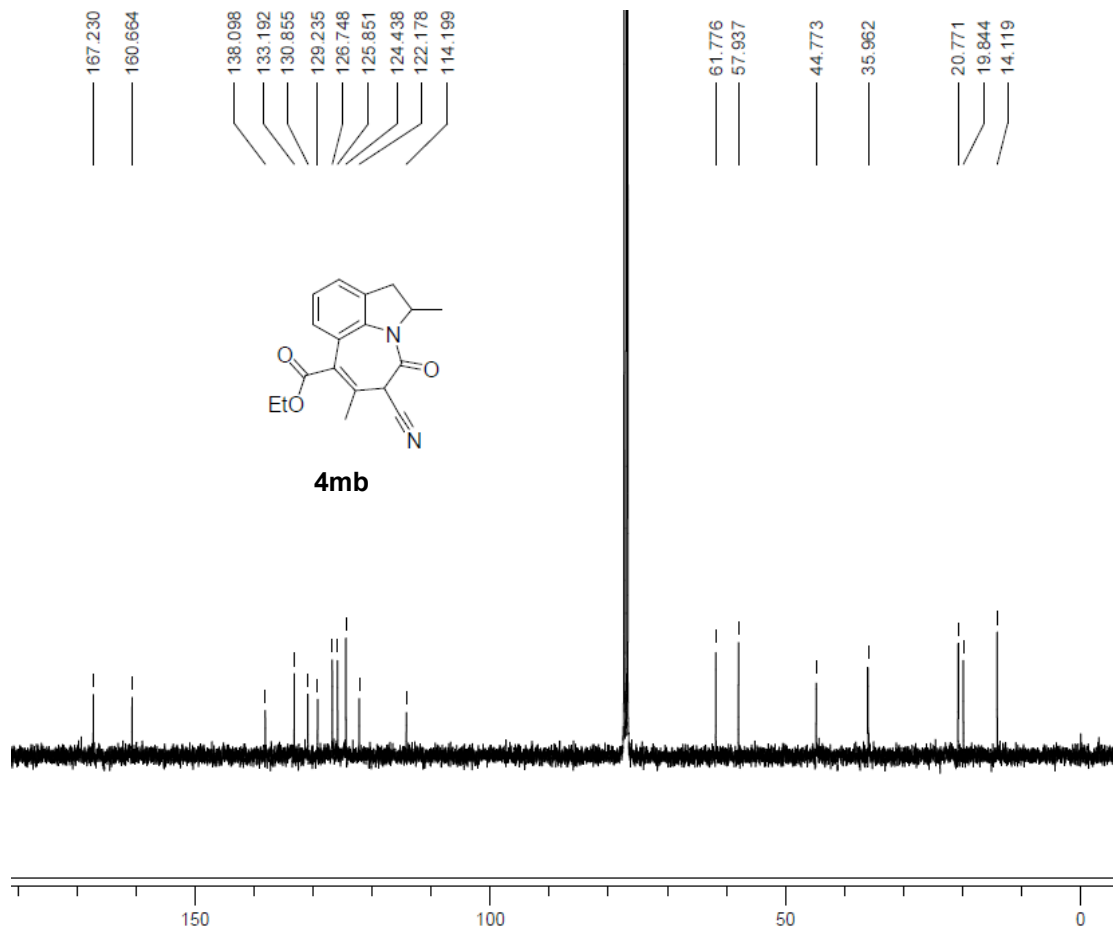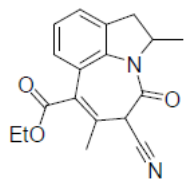

**4mb**

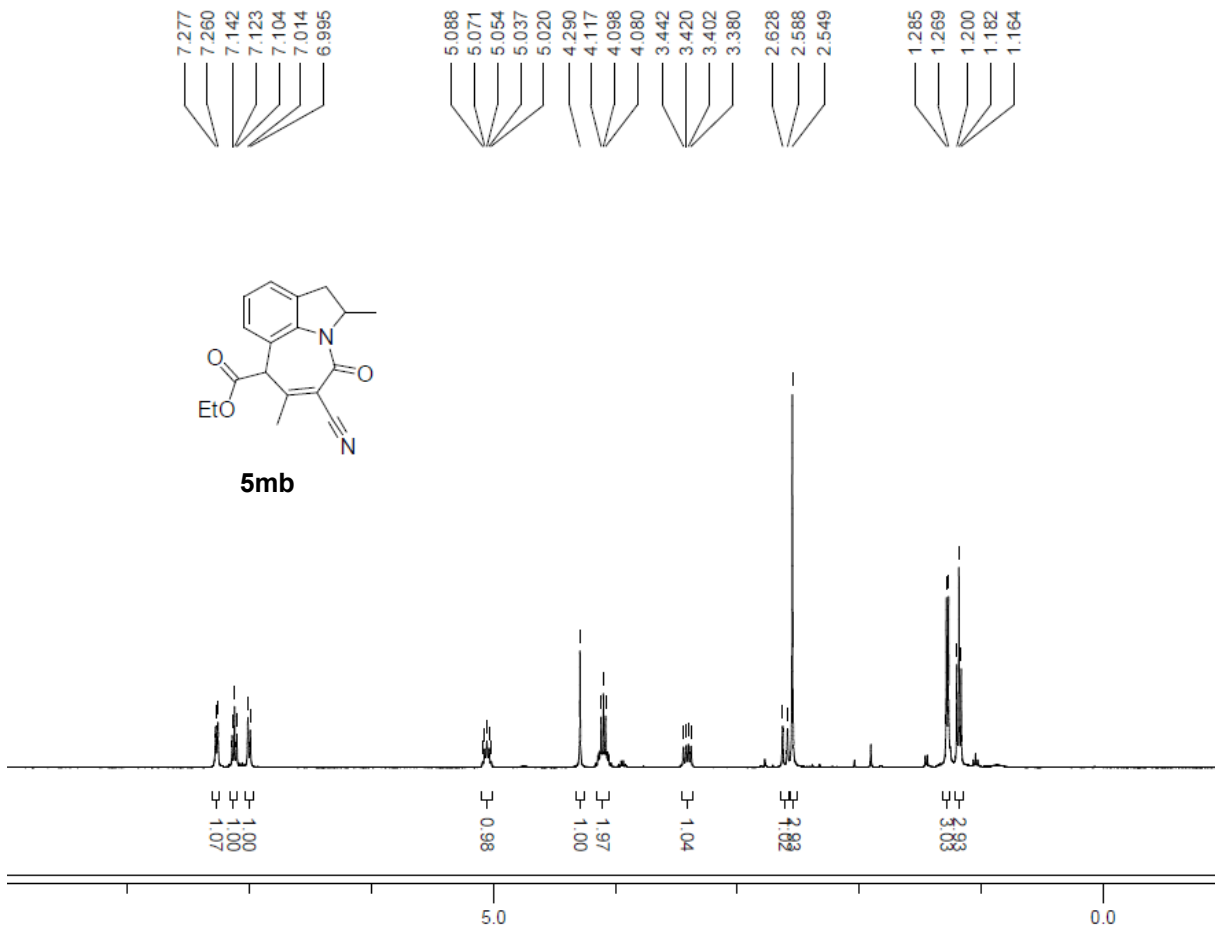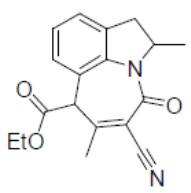

**5mb**



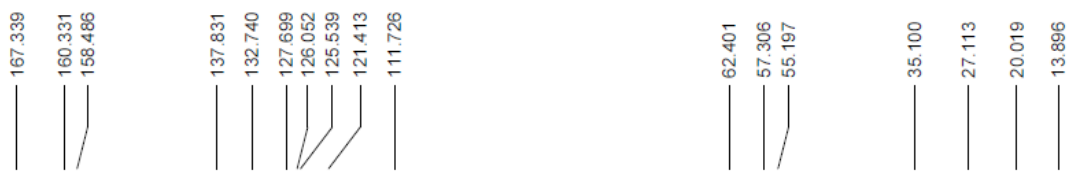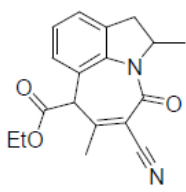

**5mb**

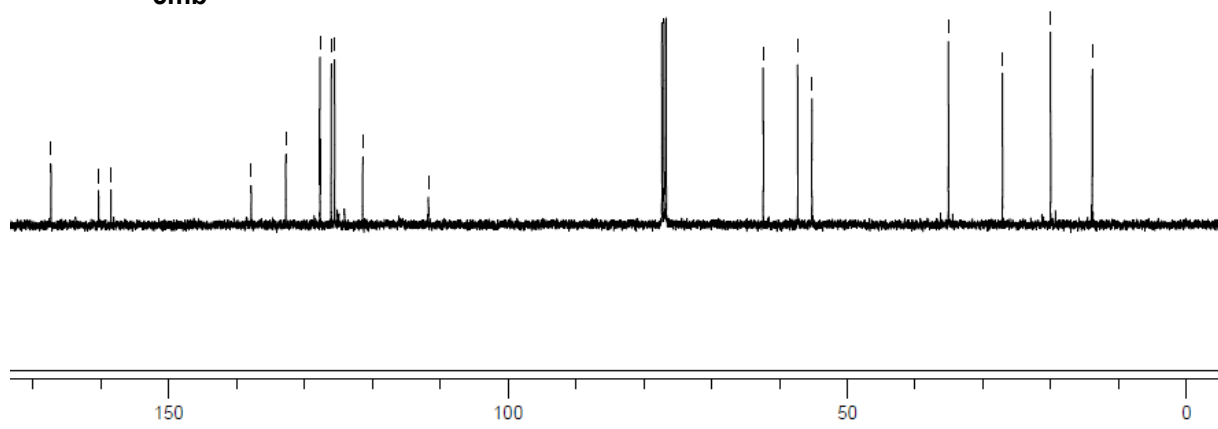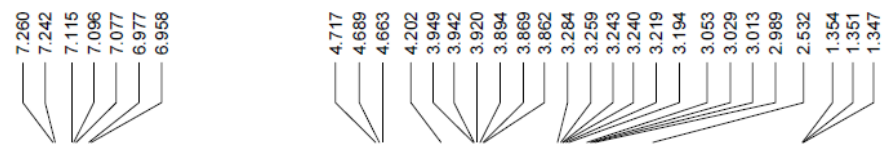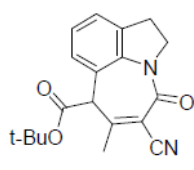

**5ac**

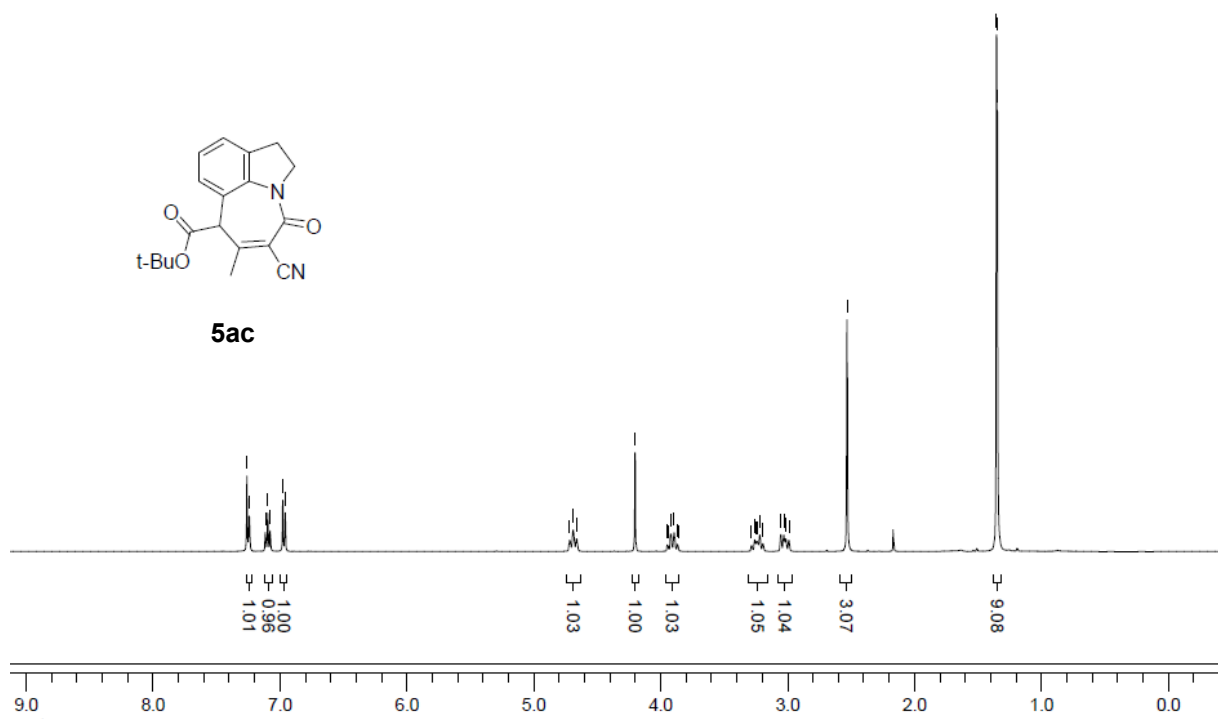

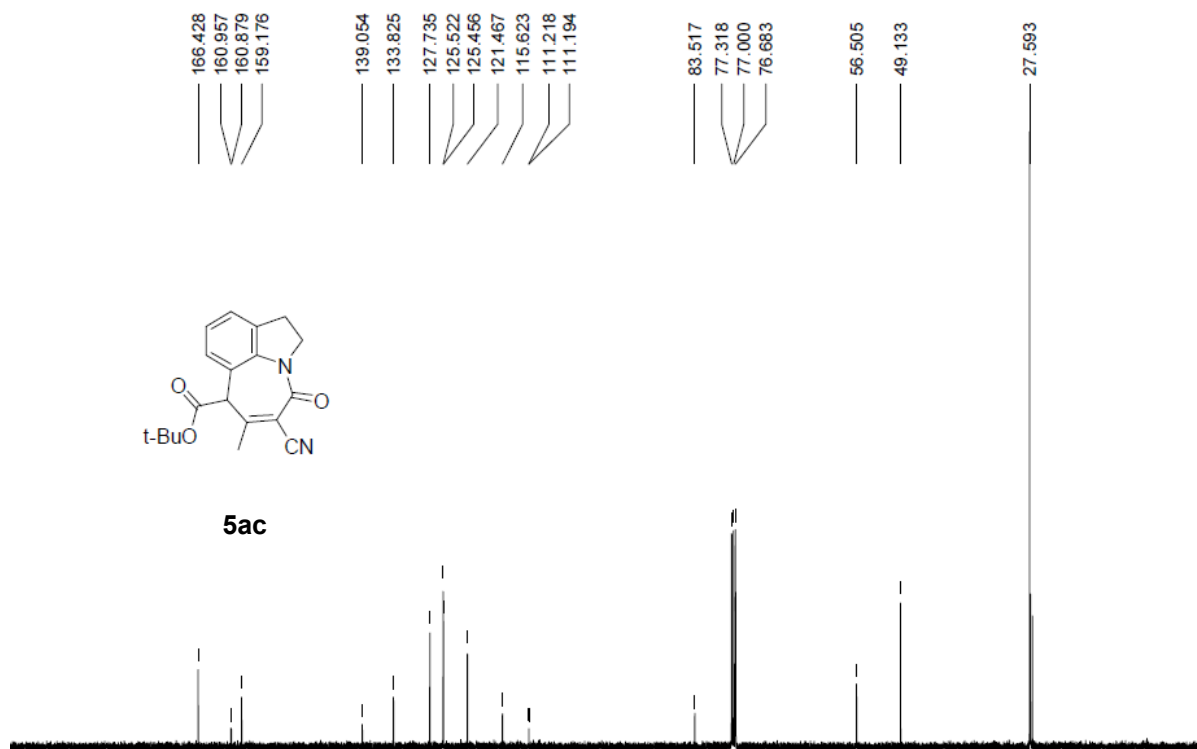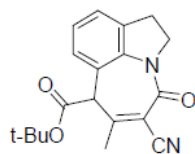

**5ac**

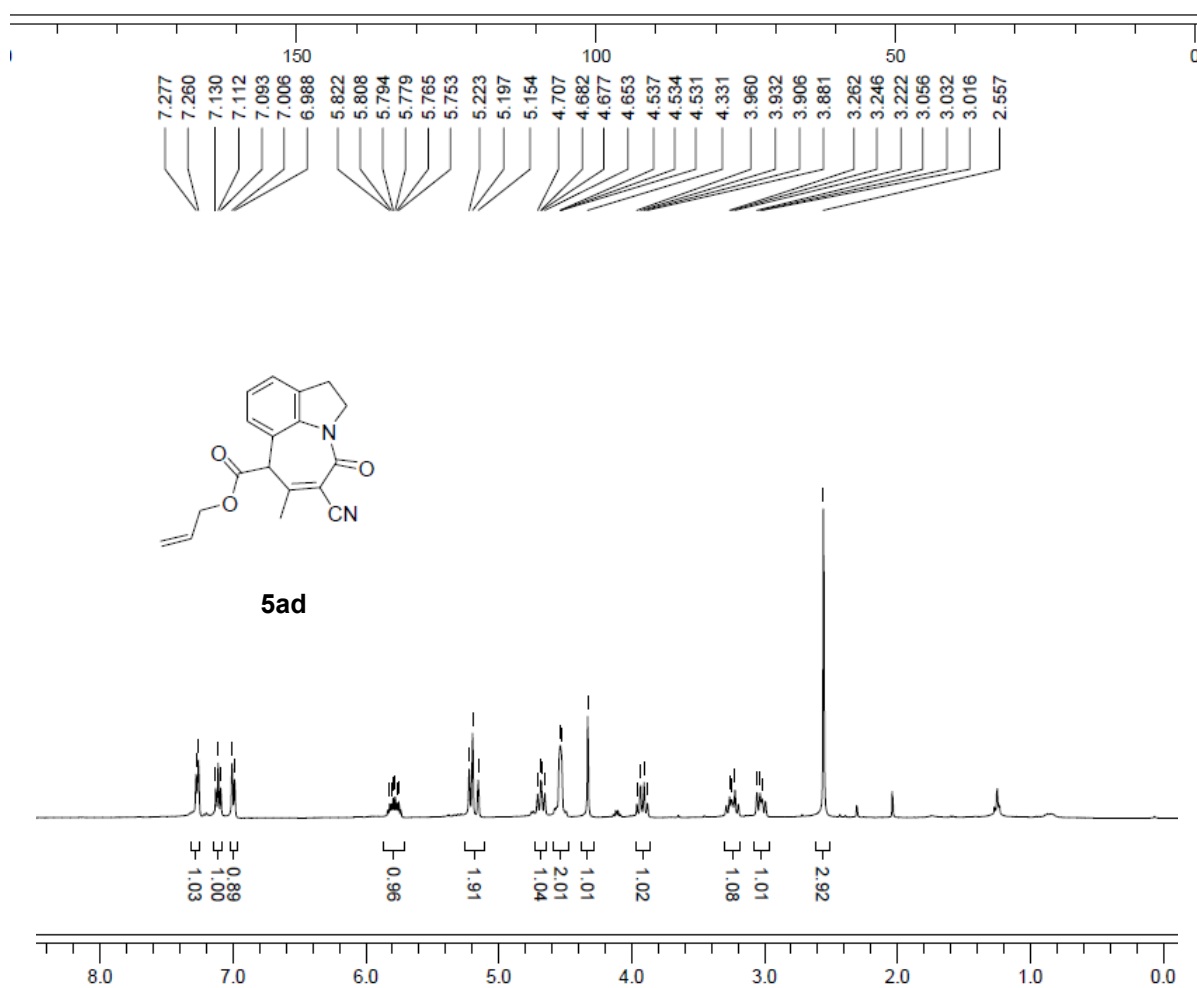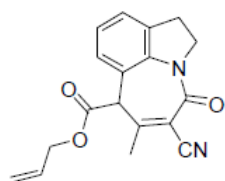

**5ad**

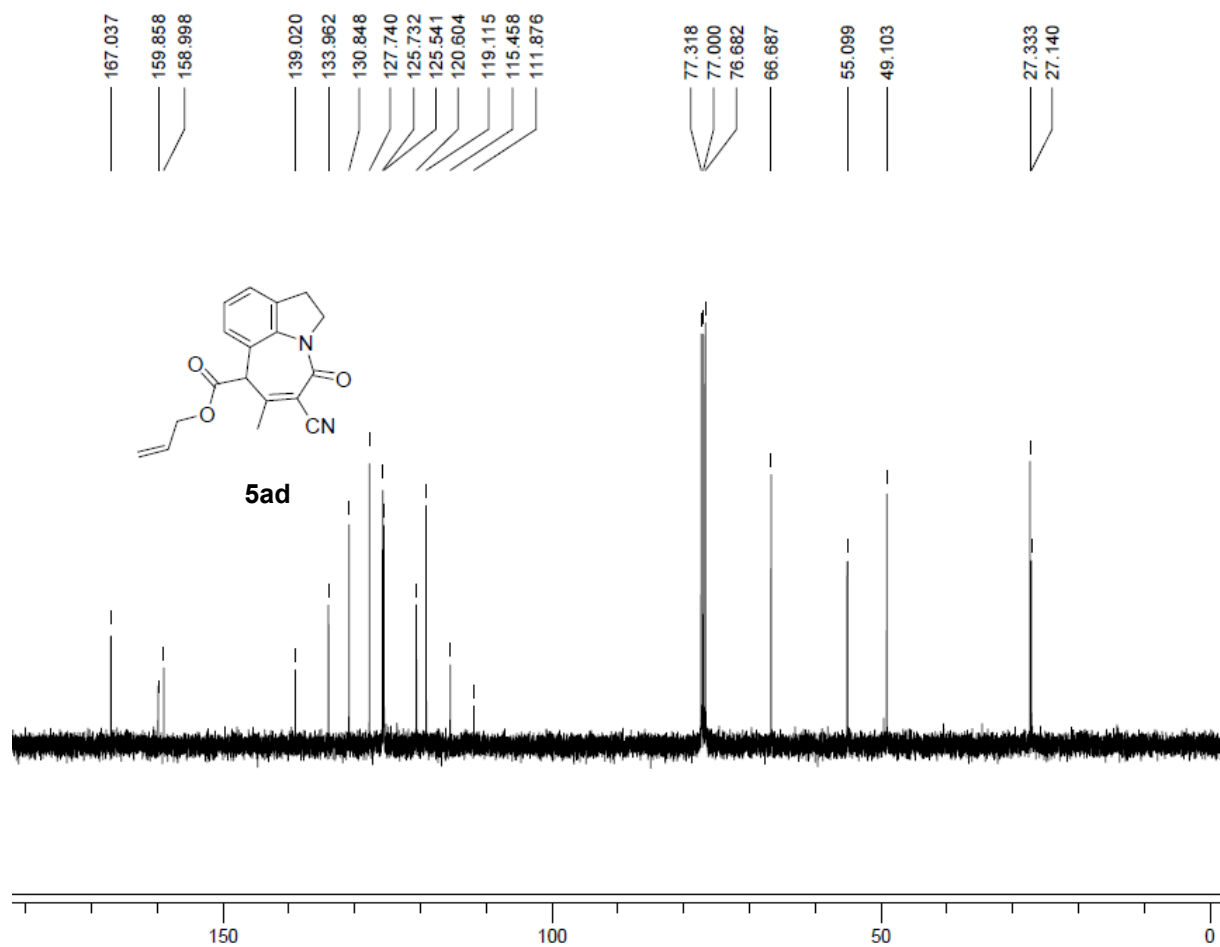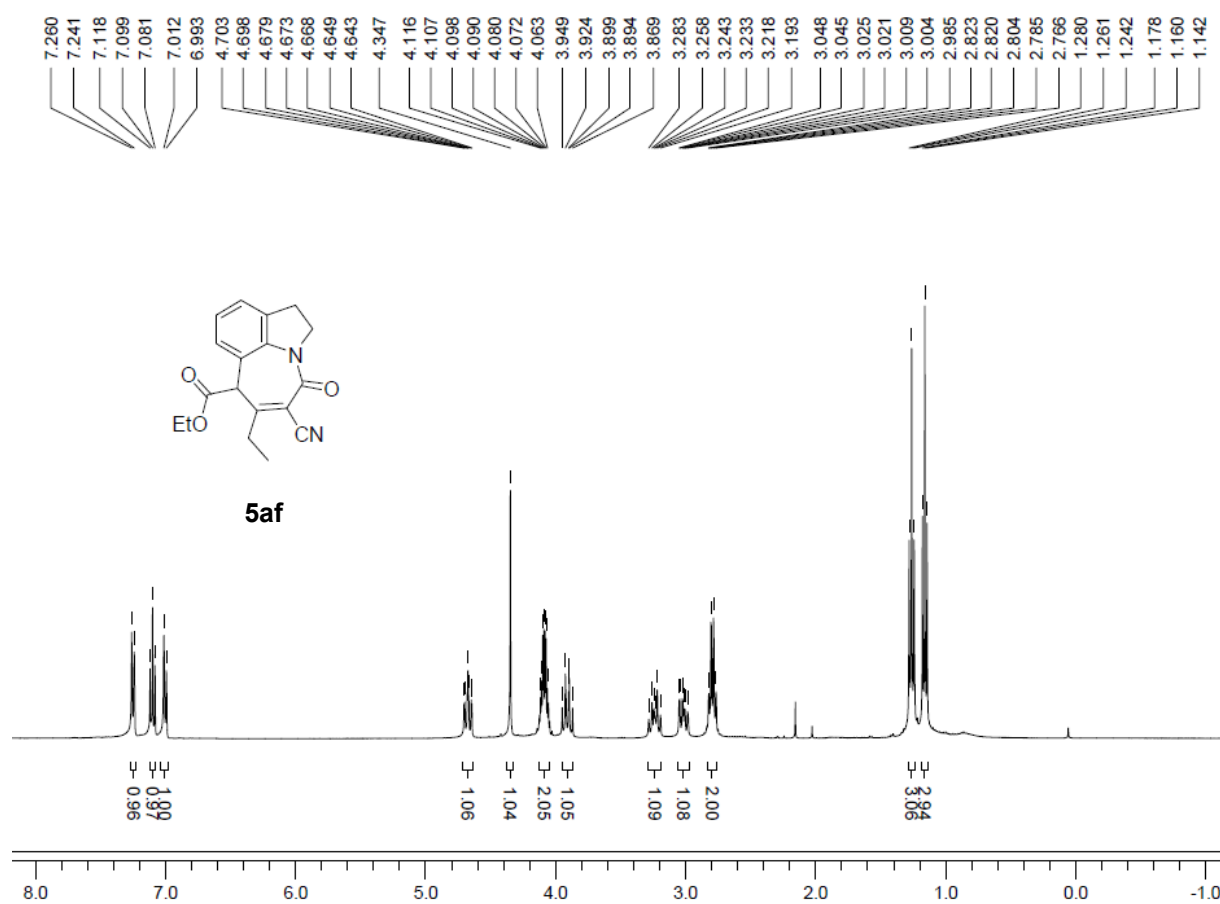

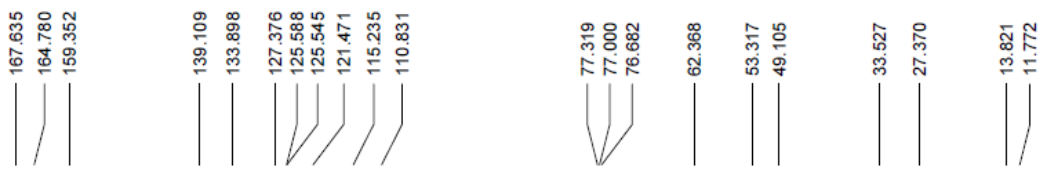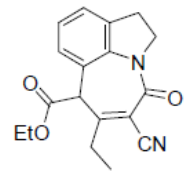

5af

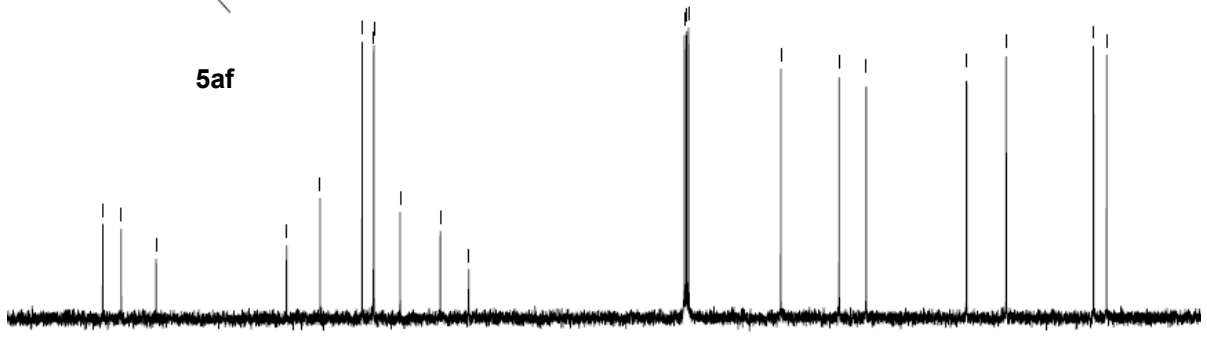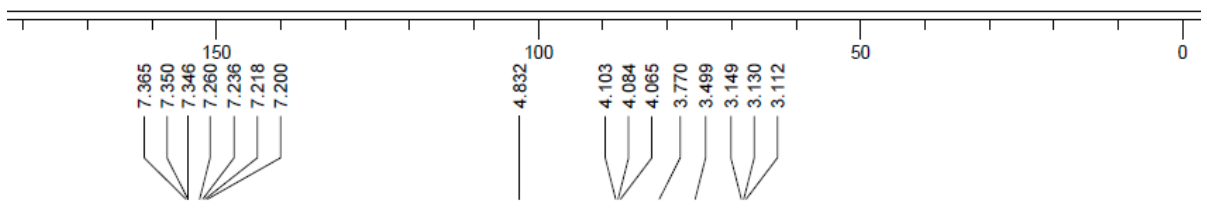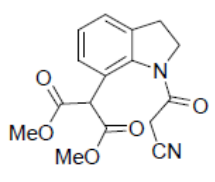

6ah

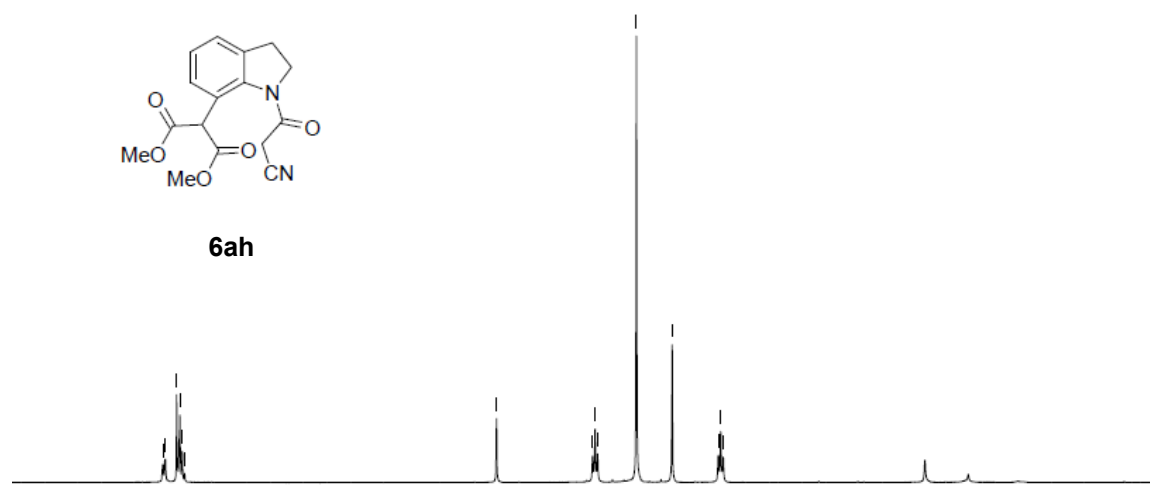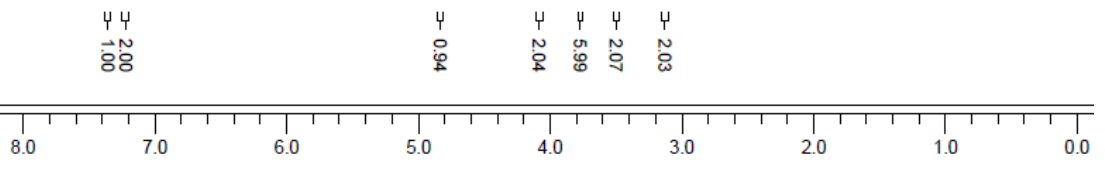

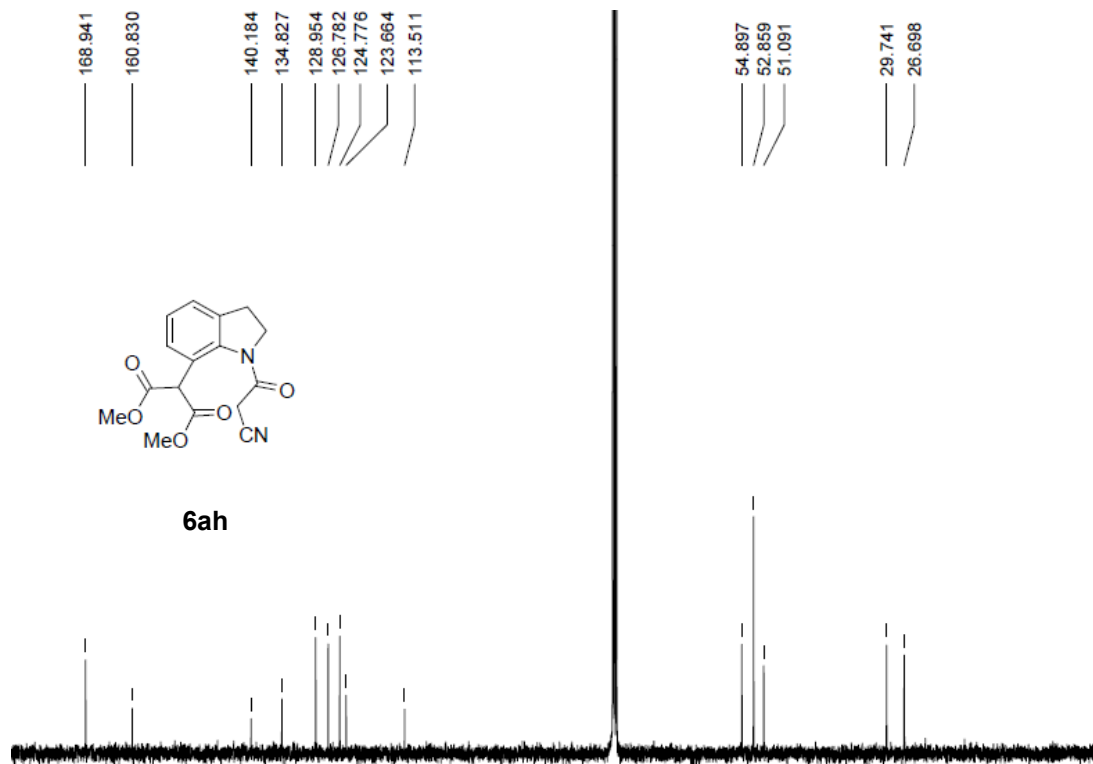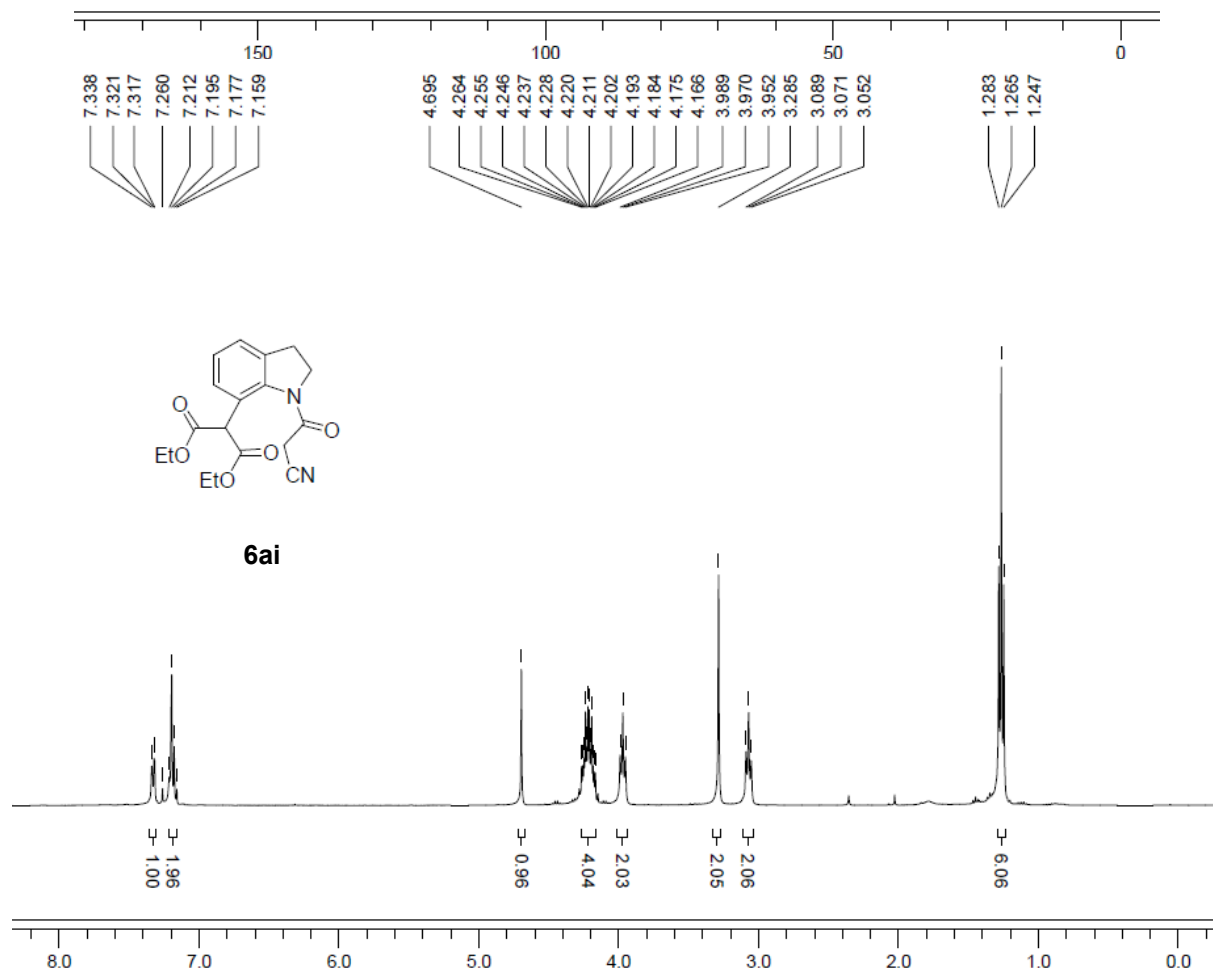

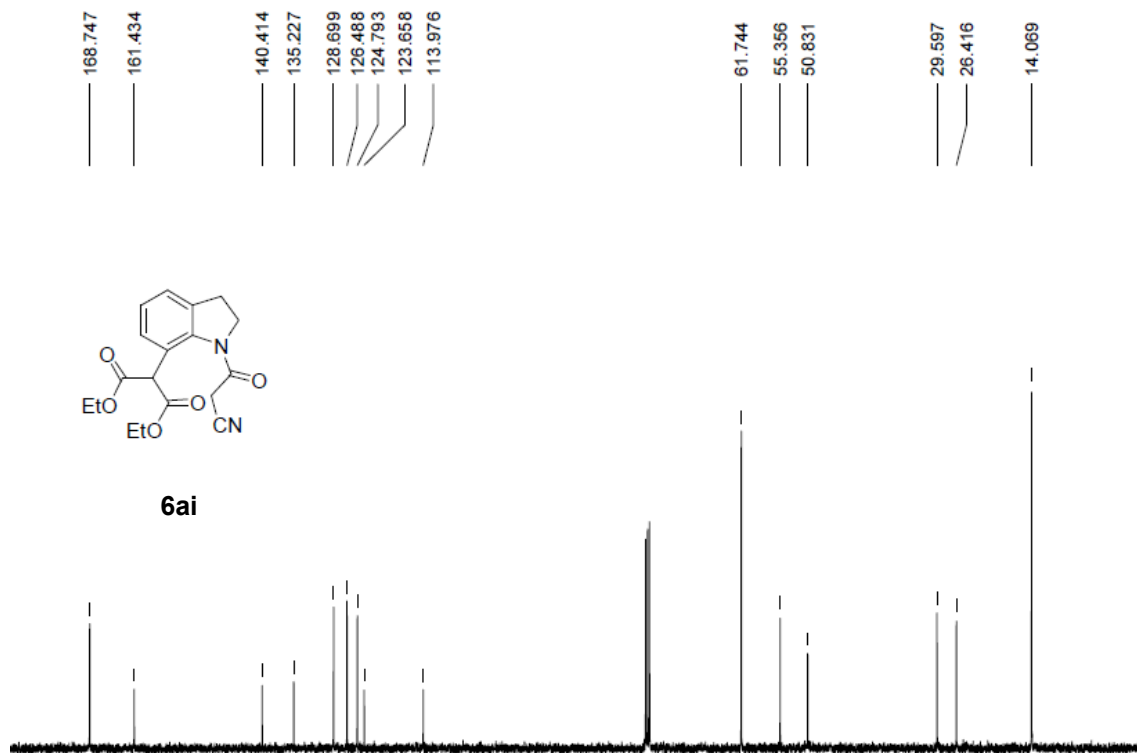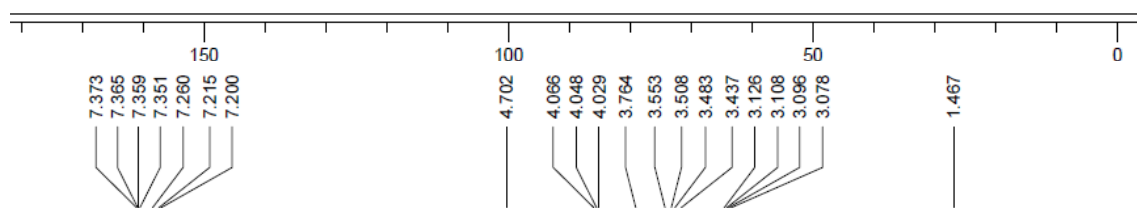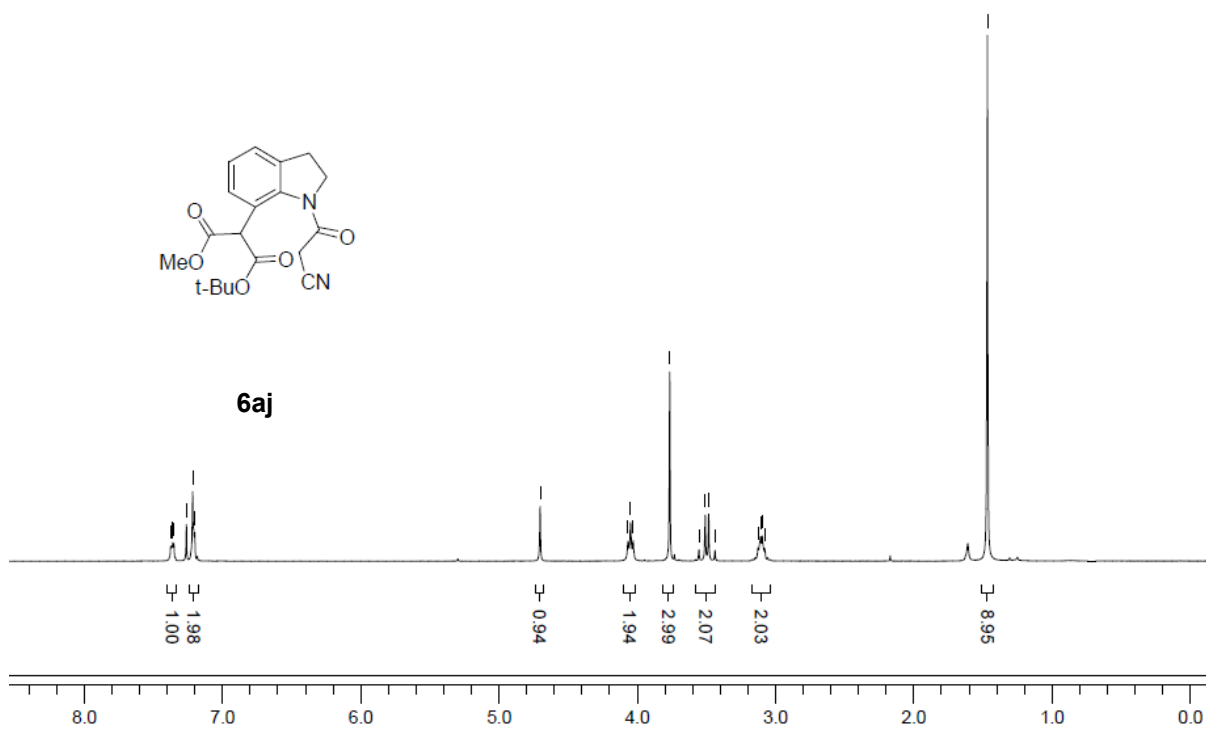

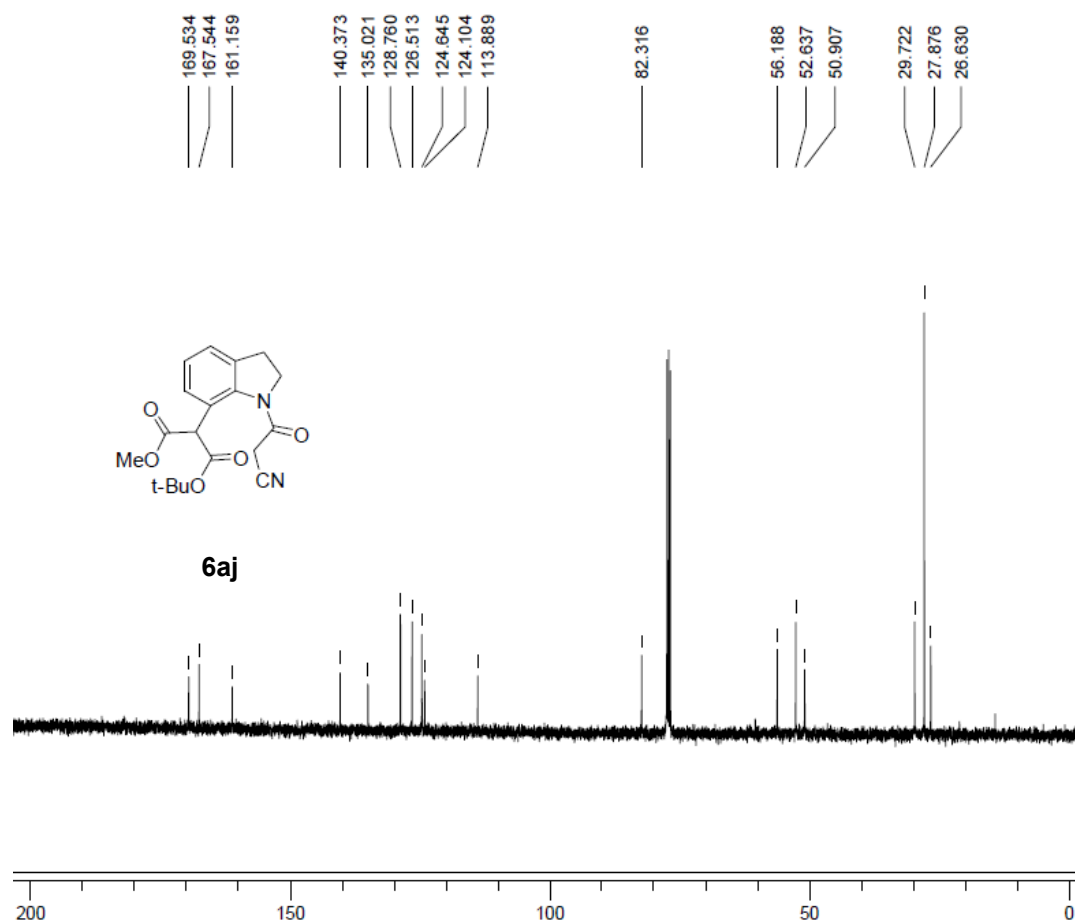

## References:

1. C. White, A. Yates and P. M. Maitlis, *Inorg. Synth.* 1992, **29**, 228.
2. T. Zhou, Y. Wang, B. Li and B. Wang, *Org. Lett.* 2016, **18**, 5066.
